# Supplementary material for: Potential ecotoxicological effects of antimicrobial surface coatings: a literature survey backed up by analysis of market reports
Source: PeerJ. 2019 Feb 11;7:e6315. doi: 10.7717/peerj.6315 (PMC6375256; doi:10.7717/peerj.6315)
Supplement: Supplemental Information 2 [file peerj-07-6315-s002.xlsx]

## Sheet: Obtained words & phrases
Category	Frequency in title-abstract-keywords	Word/phrase
material	2362	silver
target	2274	bacteria
target	1764	coli
target	1692	staphylococcus
target	1640	aureus
material	1569	polymer
target	1387	escherichia
target	1381	Escherichia coli
target	1337	Staphylococcus aureus
material	1146	polymers
material	989	acid
material	981	titanium
material	901	copper
material	860	Ag
target	835	marine
application	753	infections
material	745	protein
material	707	chitosan
target	658	microorganisms
application	630	medical
material	628	metal
target	593	pseudomonas
application	578	treatment
target	570	aeruginosa
material	562	TiO2
application	558	food
target	552	bacterium
application	536	catheter
application	533	devices
material	499	ammonium
target	479	Pseudomonas aeruginosa
material	469	silver nanoparticles
material	468	methacrylate
application	456	biomedical
application	446	implant
application	437	implants
material	428	ethylene
application	407	paint
application	407	catheters
material	391	zinc
material	380	quaternary
material	377	stainless
material	373	antibiotic
material	369	polyethylene
application	367	corrosion
material	362	silicone
material	357	copolymers
material	344	peptide
material	344	Cu
material	341	silicon
material	337	silica
target	332	epidermidis
material	329	quaternary ammonium
material	326	glycol
material	314	PEG
material	310	copolymer
material	300	proteins
material	296	polyurethane
application	284	clinical
material	284	carbon
material	280	peptides
target	275	Staphylococcus epidermidis
application	274	surgical
material	271	of silver
material	267	acrylic
material	264	gold
material	257	ZnO
material	255	polymeric
material	253	plastic
material	250	chloride
material	249	oil
material	249	methyl
material	247	AgNPs
material	246	acids
material	242	Ti
material	236	titanium dioxide
application	235	cleaning
application	233	bone
material	232	sodium
material	230	cellulose
application	228	medical devices
application	219	packaging
material	215	HA
application	213	paints
material	209	graphene
material	205	enzyme
target	202	listeria
application	196	sutures
material	189	PDMS
application	187	hospital
material	185	plastic coatings
target	184	methicillin
target	179	pathogens
material	176	chlorhexidine
target	173	bacillus
material	165	triclosan
target	164	candida
material	162	the polymer
application	161	urinary
application	161	patients
material	158	acrylate
application	157	suture
material	156	zinc oxide
application	156	ship
target	156	salmonella
application	155	protective coatings
application	154	wound
material	152	silicones
material	152	calcium
target	150	gram-negative bacteria
material	149	metal nanoparticles
material	149	antibiotics
material	148	glycols
application	147	biomedical applications
material	147	vinyl
material	145	epoxy
target	143	monocytogenes
target	142	bacteria (microorganisms)
application	141	antifouling paint
target	141	albicans
material	140	PEI
material	139	phosphate
target	138	green
application	137	dental
application	136	central venous
application	136	textiles
material	134	polyethylene glycols
material	133	halamine
material	132	ethyl
application	128	drug delivery
material	127	of Ag
material	127	hydroxyapatite
target	127	fungi
material	125	polydopamine
material	123	si
material	123	dopamine
material	122	metals
application	119	surgery
material	118	SiO2
application	118	prosthesis
application	118	implantation
material	116	polyvinyl
material	116	PDA
material	116	aluminum
target	113	Candida albicans
material	111	lysozyme
material	110	metallic
target	109	pathogenic
target	108	enterococcus
material	108	chlorine
material	106	of copper
target	106	sp
material	106	gentamicin
material	105	silver ions
target	104	Listeria monocytogenes
target	104	subtilis
material	104	quartz
target	103	barnacle
application	102	medical applications
application	102	bacterial infections
application	101	marine environment
material	101	poly(ethylene glycol)
target	101	ulva
application	101	hull
material	101	GO
material	100	ether
application	99	ships
material	98	PS
material	98	polyurethanes
material	97	silver nanoparticle
material	97	vancomycin
application	97	edible
material	97	acetate
material	96	graphene oxide
material	96	styrene
material	95	polystyrene
material	95	catechol
material	94	TBT
material	94	PET
target	93	Bacillus subtilis
material	93	metal ions
material	93	polypropylene
material	93	PAA
application	93	orthopedic
target	93	mussel
target	93	MRSA
application	92	prostheses
material	92	fluorinated
target	91	the bacteria
material	91	the silver
material	91	silane
material	91	polyethyleneimine
material	91	bromide
material	91	alkyl
application	90	hulls
material	89	ammonium compounds
target	88	gram negative
material	88	polyester
material	87	PMMA
target	87	faecalis
application	86	antifouling paints
application	86	marine antifouling
material	85	acid derivative
material	85	lactic
material	84	antimicrobial peptide
target	84	algae
material	84	alcohol
material	83	Zn
material	83	polydimethylsiloxane
material	83	macrogol
application	83	healing
material	82	hyaluronic
application	82	catheterization
material	81	Ag nanoparticles
material	81	nitrogen
material	80	hyaluronic aicid
target	80	methicillin-resistant Staphylococcus
target	80	diatom
target	79	gram positive
application	79	indwelling
target	78	methicillin-resistant staphylococcus aureus
material	78	AgNP
target	77	streptococcus
material	77	siloxane
material	77	enzymes
target	76	gram-positive bacteria
material	76	of silver nanoparticles
material	76	surfactant
application	76	patient
application	75	biomedical deivices
application	75	shelf life
material	74	ammonium salt
material	74	sulfobetaine
target	74	planktonic
material	74	PES
target	74	innocua
material	74	CHX
application	73	biomedical equipment
target	73	methicillin resistant
material	73	QAS
material	73	methacrylic
material	73	ceramic
material	72	block copolymers
material	72	ethylene glycol
material	72	nanoparticles were
application	72	panels
application	71	food packaging
target	71	spores
material	71	PEO
material	71	nitrate
material	71	nisin
material	71	methacrylates
material	71	butyl
material	71	blue
material	70	antimicrobial peptides
material	70	quaternary ammonium salt
application	70	the marine
target	70	diatoms
target	70	aspergillus
material	69	amino acids
material	69	minocycline
target	68	larvae
material	68	gelatin
material	68	diamond
application	67	health care
target	67	methicillin resistant staphylococcus aureus
material	67	titania
application	67	nosocomial
material	67	nanosilver
target	66	Enterococcus faecalis
application	66	of medical
material	66	PVC
application	65	sensors
target	65	pathogen
material	65	heparin
material	65	fluorine
material	64	and silver
target	64	coli o157
target	64	gram-positive and
material	64	nanoparticles AgNPs
application	64	urinary tracy
target	64	balanus
material	63	antimicrobial cationic
application	63	for biomedical
application	63	CVCs
material	62	of polymer
application	62	hospitals
material	62	DLC
material	62	cyclodextrin
target	62	amphitrite
material	62	AMP
application	61	prostheses and
material	61	silver nanoparticles AgNPs
material	61	melimine
material	61	ciprofloxacin
material	61	chitin
material	61	carboxylic
material	61	Ca
application	60	intensive care
material	60	starch
material	60	PU
application	60	implanted
material	59	with silver
target	59	virus
material	59	phosphorylcholine
material	59	dimethylamino
material	59	cement
material	58	on titanium
application	58	prevention and
material	58	silver nitrate
application	58	underwater
material	58	cuprous
material	58	amines
material	58	allyl
application	57	for medical
target	57	gram-positive bacterium
material	57	polymer coating
target	57	staphylococcal
material	57	alginate
material	56	polymer coatings
target	56	yeast
application	56	diseases
material	55	lactic acid
target	55	marine organisms
material	55	silicon dioxide
application	55	water treatment
material	55	polysaccharides
target	55	klebsiella
application	55	fruit
material	55	ester
application	55	endotracheal
material	55	anhydride
application	55	AF
material	54	ammonium derivative
application	54	medical device
material	54	zeolite
application	54	tubes
material	54	silanes
material	54	oils
material	54	nickel
application	54	milk
application	54	inflammatory
material	54	acrylamide
material	53	titanium titanium
material	53	gold nanoparticles
material	53	methacrylic acid
material	53	of chitosan
application	53	venous catheters
target	53	thoracica
material	53	potassium
material	53	nitric
material	53	DMAEMA
application	52	catheter infection
application	52	central venous catheters
application	52	marine fouling
material	52	terephthalate
application	52	oral
target	52	mutans
application	52	dye
material	51	acrylic acid
application	51	on stainless steel
material	51	TiO 2
material	51	zno nanoparticles
application	51	vessels
material	51	PMOXA
material	51	esters
material	51	AgNO3
material	50	acrylic monomers
application	50	and implants
application	50	antibiotic resistance
material	50	chitosan coatings
material	50	chlorine compounds
material	50	cuprous oxide
material	50	quaternary ammonium derivative
material	50	pyridinium
material	50	PE
target	49	typhimurium
material	49	polyacrylic
target	49	pneumoniae
material	49	plastics
target	49	niger
material	49	latex
material	49	extracts
material	49	dimethyl
application	49	bloodstream
material	49	AMPs
application	48	in marine
material	48	metal nanoparticle
material	48	of titanium
material	48	poly(methyl methacrylate)
material	48	silver and
application	48	surgical site
application	48	wound infection
material	48	PVP
material	48	peroxide
material	48	molybdenum
application	48	fracture
application	48	biosensors
application	47	delivery system
material	47	nitric oxide
material	47	on glass
material	47	organic acids
application	47	staphylococcal infctions
application	47	vascular
material	47	sulfate
material	47	polyesters
material	47	furanone
material	47	fluoride
target	47	alga
material	46	amino acid
target	46	and gram-positive
application	46	food preservation
material	46	macrogol derivative
material	46	PVDF
application	46	prosthetic
material	46	polyglactin
material	46	polyethylenimine
material	46	polyaniline
material	46	hydrochloride
target	46	fungus
material	45	chitin chitosan
target	45	Klebsiella pneumoniae
material	45	of ZnO
material	45	PVA
material	45	polyethylenes
material	45	PCL
material	45	hydroxyethyl
material	45	glycidyl
material	44	ammonium salts
target	44	Balanus amphitrite
application	44	for marine
material	44	quaternary ammonium compounds
material	44	sulfadiazine
material	44	PDMAEMA
target	44	algal
material	43	copper and
material	43	essential oil
application	43	infection prevention
target	43	pathogenic bacteria
material	43	the Ag
material	43	tannin
material	43	cysteine
material	43	carbonate
application	42	venous catheter
application	42	central venous catheter
material	42	hydrogen peroxide
application	42	marine applications
application	42	of medical devices
material	42	urethane
material	42	polysiloxane
material	42	polypeptide
material	42	NP
material	42	lipid
material	42	glycerol
material	42	curcumin
application	41	bacterial infection
material	41	calcium phosphate
application	41	dental implants
application	41	drug delivery system
target	41	Listeria innocua
material	41	nanoparticles silver
material	41	polyethylene glycol
application	41	prostheses and implants
material	41	titanium titanium dioxide
material	41	propyl
material	41	oxazoline
material	41	isothiocyanate
target	41	enterica
target	41	cyprids
material	41	CS
target	41	acinetobacter
target	40	against gram-positive
material	40	cationic peptodes
application	40	for biomedical applications
application	40	infection control
material	40	quaternary ammonium salts
application	40	the implant
material	40	TA
application	40	stents
material	40	RGO
material	40	polyglycerol
material	40	phenolic
target	40	barnacles
material	40	Au
application	39	contact lenses
material	39	silver ion
material	39	silver surface
material	39	the protein
material	39	zwitterionic polymers
application	39	wastewater
material	39	sorbate
material	39	PLL
material	39	penicillium
application	39	meat
material	39	lysine
material	39	laccase
material	39	fatty
application	39	CVC
material	39	azide
application	38	equipment contamination
application	38	marine coatings
application	38	nosocomial infections
material	38	of Cu
target	38	Salmonella typhimurium
material	38	silica nanoparticles
material	38	the copper
material	38	the polymers
material	38	TiO2
material	38	polystyrenes
material	38	penicillin
material	38	organometallic
target	38	mold
material	38	hema
application	38	dressings
material	38	dendrimers
target	37	aureus mrsa
material	37	carbon nanotubes
material	37	clycol peg
application	37	implant surfaces
application	37	marine biofouling
material	37	methacrylic acid derivative
material	37	polyurethane coatings
application	37	prosthesis-related infections
target	37	Salmonella enterica
target	37	Streptococcus mutans
application	37	urinary catheters
material	37	polyethersulfone
material	37	chlorinated
material	37	ceramics
material	37	capsaicin
target	36	Aspergillus niger
application	36	cross infection
target	36	nonhuman Pseudomonas
material	36	of proteins
material	36	of TiO2
material	36	polyvinyl alcohol
target	36	viruses
application	36	tooth
material	36	tertiary
material	36	rosin
material	36	polysaccharide
material	36	PLA
material	36	montmorillonite
material	36	iodine
material	36	iodide
application	36	implantable
application	36	fruits
application	36	ETT
target	35	both gram-positive
application	35	catheter-related infections
material	35	cellulose acetate
application	35	clinical trial
application	35	delivery systems
application	35	in seawater
application	35	industrial applications
material	35	ionic liquids
material	35	polyethylene oxides
material	35	polymer blends
material	35	titanium alloy
material	35	titanium surfaces
application	35	tract infections
material	35	VP
application	35	solar
application	35	RO
target	35	putida
material	35	polyamide
material	35	PA
material	35	Ni
material	35	MPC
application	35	hygiene
application	35	filters
material	35	collagen
material	35	betaine
material	35	acrylates
material	34	Ag ions
material	34	antimicrobial polymers
material	34	block copolymer
material	34	chitosan coating
material	34	disinfectant agent
target	34	Escherichia coli O157: H7
application	34	for preventing
target	34	infections staphylococcus
material	34	of silver ions
material	34	protein and
material	34	sodium chloride
application	34	urinary tract infections
material	34	zwitterionic polymer
material	34	rifampicin
material	34	QA
material	34	polycarbonate
target	34	phage
material	34	methylene
material	33	antimicrobial cationic peptides
material	33	ethylene ethylene glycol
application	33	marine antifouling coatings
material	33	poly(acrylic acid
material	33	surface properties titanium
application	33	surgical wound
material	33	the TiO2
material	33	tannic
material	33	SWNT
material	33	pyridine
material	33	PP
material	33	porphyrin
material	33	polymethyl
material	33	phenols
material	33	medetomidine
material	33	magnesium
material	33	dimethylsiloxane
material	33	Cr
target	33	cereus
target	33	bacteriophage
material	33	amide
material	32	ammonium chloride
material	32	and copper
application	32	bloodstream infection
application	32	corrrosion protection
material	32	diamond-like carbon
application	32	food safety
application	32	in medical
material	32	of PEG
material	32	of polymers
material	32	organic compounds
material	32	polydimethylsiloxane PDMS
material	32	polymers were
application	32	ship hulls
application	32	the food
application	32	tract infection
material	32	waterborne polyurethane
material	32	fatty acids
material	32	protease
application	32	medicine
application	32	intubation
material	32	Br
material	32	benzoate
target	32	baumannii
application	32	anticorrosive
application	32	allograft
application	31	bacterial contamination
material	31	and zinc
application	31	edible coatings
material	31	cationic peptide
material	31	nanoparticle silver
material	31	oligo(ethylenene glycol
material	31	organic polymers
application	31	surgical wound infection
material	31	violet
material	31	polylactic
target	31	navicula
material	31	maleic
target	31	larva
application	31	heart
material	31	cinnamaldehyde
material	31	CHI
material	31	carboxyl
application	31	anticorrosion
material	30	Ag NPs
target	30	marine bacteria
material	30	ether methacrylate
material	30	titanium implants
application	30	SSI
material	30	soybean
material	30	polyurethan
target	30	pneumonia
material	30	octenidine
application	30	mats
application	30	clinically
material	30	clay
material	30	caprolactone
material	30	alumina
application	29	contact lens
material	29	chitosan and
application	29	hospital-acquired infections
application	29	medical implants
application	29	microbial contamination
target	29	Pseudomonas putida
material	29	containing silver
material	29	tannic acid
material	29	the hydrogel
material	29	of Ag nanoparticles
material	29	of the silver
application	29	the marine environment
material	29	pSBMA
target	29	posibacteria
material	29	polypropylenes
material	29	methacryloyloxyethyl
material	29	LF
material	29	graphite
material	29	ethers
material	29	aromatic
material	29	AgCl
application	28	and biomedical
target	28	Bacillus cereus
application	28	care unit
application	28	on medical
material	28	and chitosan
material	28	copper nanoparticles
material	28	copper oxide
material	28	polypeptide antibiotic
material	28	silver titanium
material	28	chitin chitosan coatings
material	28	metal nanoparticles nanoparticles
material	28	polypeptide antibiotic agent
material	28	silver nanoparticles silver
material	28	silver nanoparticles were
target	28	methicillin-resistant staphylococcus aureus MRSA
application	28	subcutaneous
application	28	sepsis
application	28	screws
material	28	rifampin
material	28	polylactide
material	28	polyimide
material	28	PHMG
material	28	PC
application	28	meshes
target	28	linza
target	28	larval
material	28	guanidine
material	28	EO
application	27	edible coating
material	27	a polymer
material	27	and Ag
material	27	copolymers were
application	27	wastewater treatment
material	27	methyl ether
material	27	of AgNPs
material	27	polylactic acid
material	27	polymers are
material	27	the chitosan
material	27	the copolymer
material	27	TiO2 nanoparticles
material	27	titanium surface
application	27	drug delivery systems
application	27	intensive care unit
application	27	urinary tract infection
application	27	SPC
material	27	PAS
material	27	isopropylacrylamide
material	27	iron
material	27	hypochlorite
material	27	dextran
application	27	denture
material	27	CMC
material	27	chromium
material	27	CD
material	27	carvacrol
material	27	carrageenan
material	27	carboxymethyl
application	26	artificial membrane
application	26	human infection
application	26	of biomedical
application	26	ortophedic implants
application	26	site infection
application	26	surgical infection
material	26	AgNPs were
application	26	wound dressings
application	26	wound healing
material	26	alkyl chain
material	26	antibacterial polymer
material	26	of graphene
material	26	oxide nanoparticles
material	26	polymethyl methacrylate
material	26	quantum dots
material	26	silver particles
material	26	the metal
application	26	in the marine
material	26	triazole
material	26	terpolymers
material	26	terpolymer
material	26	selenium
material	26	polypeptides
material	26	polyols
application	26	pigments
material	26	PI
material	26	methacrylamide
material	26	hydantoin
material	26	halamines
target	26	cyprid
material	26	citrate
target	26	amphora
material	26	allylamine
application	25	active packaging
application	25	and medical
application	25	catheter-related bloodstream
application	25	food storage
application	25	implant-associated infections
application	25	packaging materials
application	25	the catheter
target	25	Ulva linza
material	25	Ag and
material	25	coatings copper
material	25	essential oils
material	25	glycol methyl
material	25	peptides (AMPs)
material	25	polymers with
material	25	silver compounds
material	25	the AgNPs
material	25	antimicrobial cationic peptide
material	25	antimicrobial peptides AMPs
material	25	glycol methyl ether
material	25	the silver nanoparticles
application	25	shelf life of
application	25	surgical site infection
application	25	wires
material	25	sulfur
application	25	stent
material	25	SB
material	25	PSS
material	25	PLLA
material	25	PANI
target	25	microalgae
material	25	CuO
target	24	Acinetobacter baumannii
application	24	and industrial
application	24	antibiotic prophylaxis
application	24	catheters were
application	24	food microbiology
application	24	food processing
application	24	infection central
application	24	of implant
material	24	allyl isothiocyanate
material	24	carbocylic acid
material	24	cationic polymers
material	24	gold surfaces
material	24	methylene blue
material	24	polyacrylic acid
material	24	polyethylene terephthalates
material	24	potassium sorbate
material	24	terephthalate (PET)
material	24	the copolymers
material	24	the PEG
material	24	zinc zinc
application	24	coatings for medical
application	24	for medical devices
application	24	the shelf life
material	24	vinylpyridine
material	24	terephthalates
material	24	TC
material	24	polymethacrylic
application	24	pharmaceutical
material	24	PEGMA
material	24	HAP
material	24	halloysite
material	24	formaldehyde
target	24	fluorescens
target	24	difficile
application	24	CV
material	24	ampicillin
application	23	antifouling device
application	23	antimicrobial packaging
application	23	bacteria biomedical
application	23	contamination food
application	23	environmental monitoring
application	23	of biomaterials
target	23	Pseudomonas fluorescens
application	23	site infections
material	23	copolymers with
material	23	epoxy resins
material	23	maleic anhydride
material	23	mesoporous silica
material	23	of metal
material	23	of polyurethane
material	23	poly(ethylene terephthalate
material	23	silicone derivative
material	23	the titanium
application	23	sterile
material	23	QAC
material	23	platinum
material	23	Nb
target	23	mussels
material	23	mercury
target	23	lactobacillus
material	23	hydroxypropyl
material	23	DMA
application	23	dermatitis
material	23	chlorides
material	23	biopolymer
material	23	bacteriophages
application	22	endotracheal tube
application	22	food industry
target	22	gram-negative and
application	22	hulls ship
application	22	the clinical
material	22	a silver
material	22	antibacterial polymers
application	22	to marine
material	22	copper ions
material	22	of zinc
material	22	oil and
material	22	on silicone
material	22	polydopamine PDA
material	22	polymer silver
material	22	silane derivative
material	22	silver in
material	22	the PDMS
material	22	the ZnO
material	22	titanium alloys
application	22	vegetable
material	22	tannins
material	22	silicate
material	22	SBMA
application	22	preservative
material	22	polytetrafluoroethylene
material	22	PAH
material	22	MMA
target	22	marina
material	22	LL-37
material	22	HPG
application	22	HAIs
material	22	GS
material	22	furanones
material	22	cyclodextrins
material	22	carboxybetaine
application	22	BSI
target	22	alternaria
application	21	biomedical implants
application	21	clinical study
application	21	food preservatives
application	21	for food
application	21	fouling prevention
application	21	hospital acquired
application	21	of food
material	21	2-(Dimethylamino)Ethyl Methacrylate
material	21	acrylic resins
material	21	Ag nanoparticle
target	21	the barnacle
application	21	the paint
material	21	Ag SiO2
material	21	agent copper
material	21	carbon nanotube
application	21	water pollution
material	21	carboxylic acids
material	21	copper coatings
material	21	derivative silver
material	21	epoxy resin
material	21	of lysozyme
material	21	of quaternary
material	21	polymer and
material	21	polymer surface
material	21	the silica
material	21	titanium oxide
material	21	titanium substrates
material	21	with chitosan
material	21	Zr
application	21	ventilation
application	21	turkey
material	21	trioxide
application	21	transplantation
application	21	papaya
material	21	methylcellulose
material	21	maleimide
target	21	jejuni
material	21	ILs
application	21	hernia
target	21	halobacterium
target	21	foley
material	21	detergent
material	21	Cys
application	21	cantaloupes
material	21	boron
application	20	and orthoses
application	20	bone cement
application	20	catheters and
application	20	contact dermatitis
application	20	device infection
application	20	drug carriers
application	20	endotracheal intubation
application	20	food contamination
application	20	fuel consumption
application	20	heart valve
application	20	implant-associated infection
application	20	in biomedical
application	20	in hospitals
material	20	Ag coatings
target	20	of barnacle
material	20	antifouling polymer
material	20	antimicrobial polymer
material	20	coating copper
material	20	crystal violet
application	20	ship hull
material	20	glycol methacrylate
material	20	glycols polyethylene
application	20	the medical
material	20	graft copolymers
material	20	heavy metals
material	20	ions metal
material	20	methyl methacrylate
material	20	minocycline and
material	20	of poly(ethylene
material	20	pes membranes
material	20	polymer was
material	20	reduced graphene
material	20	silica surface
material	20	silver sulfadiazine
material	20	agents antimicrobial cationic
application	20	in the marine environment
application	20	food contamination food
application	20	prostheses and orthoses
application	20	surgical site infections
target	20	yeasts
material	20	whey
material	20	trimethoxysilyl
application	20	RTE
material	20	PTFE
target	20	pseudoalteromonas
material	20	polysulfone
material	20	PNIPAAm
application	20	orthoses
material	20	MEL
application	20	maritime
material	20	GMA
material	20	glycine
application	20	foods
material	20	fluorocarbon
target	20	faecium
material	20	epoxide
application	20	dressing
material	20	DOPA
material	20	arginine
application	20	apples
material	20	aluminium
material	20	alloyed
application	19	a marine
application	19	and optical
application	19	indwelling catheter
target	19	marine bacterium
application	19	medical and
application	19	self-cleaning and
material	19	acid PAA
application	19	tooth implant
material	19	acid resin
material	19	and sodium
material	19	calcium carbonate
material	19	copper content
material	19	hyperbranched polyglycerol
material	19	methacrylate polymer
material	19	of antibiotic
material	19	of TiO
material	19	silver loaded
material	19	sorbic acid
material	19	the peptide
material	19	TiO2 Ag
material	19	transition metal
material	19	with Ag
material	19	glycol methyl ether methacrylate
material	19	poly(ethylene glycol methyl ether
material	19	polyethylene glycols polyethylene oxides
material	19	glycols; polyethylene oxides
material	19	methyl ether methacrylate
material	19	poly(ethylene glycol methyl
material	19	poly(ethylene glycol PEG
material	19	poly(ethylene glycols polyethylene
target	19	zoospores
application	19	ventilator
material	19	trimethylammonium
material	19	tetracycline
target	19	substrata
material	19	steels
target	19	sponge
material	19	SPI
material	19	sorbic
material	19	SnO2
application	19	respiratory
target	19	proteus
material	19	polycaprolactone
material	19	polyacrylates
material	19	PFA
application	19	peritonitis
material	19	PEOX
application	19	orthopedics
target	19	molds
target	19	mirabilis
material	19	magnetite
material	19	lactide
target	19	gingivalis
material	19	coumarin
target	19	cobetia
application	19	coastal
target	19	clostridium
material	19	AIT
application	18	air conditioning
application	18	and corrosion
application	18	anticorrosive and
application	18	care units
target	18	Enterococcus faecium
application	18	in healthcare
target	18	larvae of
target	18	of pathogenic
target	18	of pathogens
application	18	of ships
application	18	on marine
application	18	paints were
application	18	pharmacology pharmacology
application	18	umbilical vein
application	18	vein endothelial
material	18	2-methacryloyloxyethyl phosphorylcholine
material	18	acid HA
material	18	copolymers of
material	18	cotton cotton
material	18	heavy metal
material	18	molybdenum trioxide
material	18	of antibiotics
material	18	proteins surface
material	18	silicon compounds
material	18	steel SS
material	18	the silicon
material	18	of Ag ions
material	18	of graphene oxide
material	18	of quaternary ammonium
material	18	with silver nanoparticles
application	18	coatings for medical devices
application	18	antifouling device coating
application	18	umbilical vein endothelial
material	18	vinylidene
material	18	trimethyl
material	18	sulfone
target	18	staphylococci
material	18	rose
material	18	pyrrolidone
material	18	propylene
material	18	polyvinylchloride
material	18	polyhexamethylene
material	18	PLGA
target	18	plaque
target	18	phytoplankton
material	18	ofloxacin
target	18	improvisus
application	18	harbour
application	18	fillets
application	18	ETTs
material	18	CTAB
material	18	bromine
material	18	aniline
target	18	amphibalanus
material	18	aminopropyl
material	18	alcohols
material	18	acetic
material	18	acetates
application	17	a clinical
application	17	acquired infection
target	17	and yeast
application	17	biofilms biomedical
application	17	catheter surface
target	17	Clostridium difficile
target	17	Cobetia marina
application	17	flame retardant
application	17	implant materials
application	17	implantation of
application	17	of hospital-acquired
application	17	paint antifouling
target	17	planktonic bacteria
application	17	staphylococcus infeciton
application	17	the optical
material	17	agent chitosan
material	17	alginic acid
material	17	chloride PVC
material	17	dioxide silver
material	17	dioxide TiO2
material	17	glycidyl methacrylate
material	17	metal oxides
material	17	of dopamine
material	17	of gold
material	17	of triclosan
material	17	on Ti
material	17	peptides and
material	17	polyurethane coating
material	17	rose bengal
material	17	silica particles
material	17	silicone hydrogels
material	17	silver nanoclusters
material	17	silver was
material	17	these polymers
material	17	with quaternary
material	17	zinc coatings
material	17	Chlorine compounds Coatings
material	17	titanium dioxide TiO2
material	17	with quaternary ammonium
material	17	zinc oxide nanoparticles
application	17	catheter infection central venous
application	17	infection central venous catheter
application	17	catheter infection central
application	17	days of storage
application	17	hospital acquired infection
application	17	in the food
application	17	medical devices and
target	17	of marine organisms
application	17	risk of infection
material	17	zeolites
application	17	wounds
material	17	trimethoxysilane
application	17	tomatoes
material	17	thyme
material	17	TAPP
material	17	SNPs
material	17	PSf
application	17	PPE
material	17	PGA
material	17	parylene
material	17	oleic
application	17	naval
material	17	mustard
material	17	MMT
material	17	MgO
application	17	limestone
material	17	levofloxacin
material	17	lauric
material	17	gentamicins
material	17	fluoropolymers
material	17	dimethacrylate
material	17	diisocyanate
application	17	diagnosis
application	17	clothing
material	17	citrus
material	17	cinnamon
application	17	cherry
application	17	boats
material	17	bengal
material	17	alginic
application	16	antimicrobial-coated catheters
application	16	biofilm catheter
application	16	broad-spectrum antimicrobial
application	16	coli food
application	16	drug carrier
application	16	foul-release coatings
target	16	fungi and
target	16	green alga
application	16	implant failure
application	16	infection suture
application	16	medical grade
application	16	minimally processed
application	16	preserving food
target	16	Proteus mirabilis
application	16	vascular grafts
application	16	water filtration
material	16	acetic acid
material	16	Ag coating
material	16	Ag release
material	16	aluminum coatings
material	16	aluminum oxide
material	16	ammonium compounds
material	16	and protein
material	16	and TiO2
material	16	coatings polymers
material	16	Cu and
material	16	graphene oxides
material	16	metal oxide
material	16	of HA
material	16	of nanosilver
material	16	of silica
material	16	PEG and
material	16	poly(sulfobetaine methacrylate
material	16	polymeric substances
material	16	polymers and
material	16	polymers have
material	16	silicon surface
material	16	sodium benzoate
material	16	tertiary amine
material	16	the oil
material	16	titatinum implant
material	16	to protein
material	16	vinyl acetate
material	16	antiinfective agent copper
material	16	polyethylene glycol PEG
material	16	zinc zinc oxide
application	16	catheter-related bloodstream infection
application	16	food preservation food
application	16	intensive care units
application	16	on medical devices
target	16	tricornutum
material	16	toluene
material	16	siloxanes
material	16	porphyrins
material	16	polylysine
material	16	PGLD
application	16	pad
application	16	nails
application	16	intravenous
target	16	gordonii
material	16	glutaraldehyde
material	16	bromides
material	16	berberine
material	16	AuNPs
material	16	arsenic
material	16	aminopropyltriethoxysilane
target	16	alternata
application	15	and food
application	15	antimicrobial edible
application	15	aqueous environment
target	15	bacterial pathogens
application	15	bloodstream infections
application	15	catheter material
application	15	catheters in
application	15	clinical applications
application	15	coated catheters
application	15	coating medical
application	15	coatings marine
application	15	device-associated infections
application	15	edible antimicrobial
application	15	for clinical
application	15	hospital infection
application	15	human umbilical
application	15	implants and
application	15	implants with
application	15	in clinical
application	15	marine pollution
target	15	mussel adhesive
application	15	nosocomial infection
application	15	of catheter-related
target	15	pathogens and
target	15	Phaeodactylum tricornutum
application	15	public health
target	15	Streptococcus gordonii
application	15	sutures were
application	15	the implants
application	15	the mesh
application	15	ultra-filtration membranes
application	15	venous catheterization
material	15	acid as
material	15	acrylic resin
material	15	alcohol PVA
material	15	and rifampin
material	15	chlorhexidine and
material	15	copper ion
material	15	copper surfaces
material	15	glycols polymerization
material	15	metals and
material	15	methacrylate DMAEMA
material	15	modified chitosan
material	15	nanoparticle titanium
material	15	of acrylic
material	15	of metallic
material	15	of PEI
material	15	of polymeric
material	15	oleic acid
material	15	on copper
material	15	on gold
material	15	polyethyleneimine PEI
material	15	polymeric materials
material	15	polymers for
material	15	polystyrene derivative
material	15	silica nanoparticle
material	15	silica silver
material	15	sulfadiazine silver
material	15	the resin
material	15	TiO2 and
material	15	titanium unclassified
material	15	antiinfective agent chitosan
material	15	minocycline and rifampin
material	15	of silver and
material	15	polyethylene glycols polymerization
material	15	quaternary ammonium groups
application	15	bacteria biomedical equipment
application	15	central venous catheterization
application	15	topical antiinfective agent
material	15	Tet213
material	15	zirconia
material	15	thiazole
material	15	thermoplastic
material	15	SWNTs
material	15	Se
material	15	pyrithione
material	15	propionic
target	15	porphyromonas
material	15	polychelates
material	15	phosphorus
target	15	phaeodactylum
material	15	nitrofurazone
material	15	nAg
target	15	MSSA
material	15	janus
target	15	influenza
material	15	HPMC
material	15	diazonium
material	15	diallyldimethylammonium
target	15	chaetomium
target	15	cauti
material	15	catechin
material	15	butenolide
material	15	benzoic
target	15	bacilli
target	14	Alternaria alternata
target	14	Amphibalanus amphitrite
application	14	catheter colonization
application	14	catheter-associated urinary
application	14	clinically relevant
application	14	coatings biomedical
application	14	for industrial
application	14	implant-related infections
application	14	in hospital
application	14	in orthopedic
target	14	marine algae
application	14	medical textiles
target	14	MRSA and
application	14	of catheters
application	14	of nosocomial
application	14	orthopedic implant
application	14	paint coatings
target	14	Porphyromonas gingivalis
application	14	the ETT
application	14	the hull
application	14	ultrafiltration membranes
application	14	water purification
application	14	wound closure
material	14	a titanium
material	14	and gold
material	14	and polymer
material	14	and proteins
material	14	carbon films
material	14	chitosan hyaluronic
material	14	cpüüer alloy
material	14	copper copper
material	14	derivative polymer
material	14	diffraction zinc
material	14	for titantium
material	14	halloysite nanotubes
material	14	hydrogel coatings
material	14	in polymer
material	14	oxide GO
material	14	phenolic compounds
material	14	poly(ethylene oxide
material	14	polyethersulfone membrane
material	14	polymer with
material	14	polyurethane acrylates
material	14	polyvinyl chlorides
material	14	silicon oxide
material	14	silicon surfaces
material	14	silver chloride
material	14	silver coating
material	14	sodium hypochlorite
material	14	the polyurethane
material	14	the silicone
material	14	TiO2 coatings
material	14	titanium oxides
material	14	with copper
material	14	with minocycline
material	14	with polymer
material	14	anti-bacterial agents antimicrobial cationic peptides
material	14	poly(ethylene glycol) methyl ether methacrylate
material	14	agent anntimicrobial cationic peptide
material	14	agent antimicrobial cationic
material	14	antibactrerial activity antibiotic
material	14	copper and zinc
material	14	graphene oxide GO
material	14	ions metal nanoparticles
material	14	nanoparticles silver nanoparticles
material	14	of TiO 2
material	14	of ZnO nanoparticles
material	14	poly(acrylic acid PAA
material	14	pole(ethylene terephthalate PET
material	14	polyvinyl chloride PVC
material	14	quaternary ammonium compound
material	14	reduced graphene oxide
material	14	silicon dioxide silver
material	14	silver nanoparticles and
application	14	catheter infection central venous catheter
application	14	antibiotic resistance article
application	14	catheter-associated urinary tract
application	14	equipment and supplies
application	14	in marine antifouling
application	14	in medical devices
material	14	zirconium
material	14	vanadium
material	14	tungsten
material	14	polyvinylidene
material	14	polyamines
material	14	polyamine
target	14	plankton
material	14	PG
material	14	perfluoropolyether
material	14	organosilicon
material	14	natamycin
target	14	mytilus
material	14	methacryloyloxy
material	14	gendine
material	14	flavonoids
material	14	ethylenediamine
target	14	enterococci
material	14	dimeticone
target	14	cylindrotheca
material	14	cobalt
application	14	clabsi
material	14	citric
target	14	cinerea
material	14	cephalosporin
application	14	burn
material	14	bisphenol
application	13	and marine
target	13	barnacle cyprids
application	13	bone regeneration
application	13	dental imlant
application	13	dental prostheses
application	13	denture base
application	13	food products
application	13	food quality
application	13	for dental
application	13	hulls and
application	13	implant coating
application	13	implants is
application	13	inflammatory response
target	13	larval settlement
target	13	of diatoms
application	13	orthopedic surgery
application	13	packaging applications
application	13	packaging food
application	13	product safety
application	13	textile industry
application	13	water quality
material	13	acrylic monomer
material	13	agent chlorhexidine
material	13	agent polymer
material	13	AgNPs in
material	13	carboxymethyl cellulose
material	13	cellulose cellulose
material	13	chitosan coated
material	13	citric acid
material	13	coatings polymer
material	13	coatings silicones
material	13	containing polymers
material	13	copper alloys
material	13	copper coating
material	13	copper oxides
material	13	derivative silicon
material	13	diblock copolymer
material	13	fatty acid
material	13	glycol dimethacrylate
material	13	glycols polymers
material	13	ionic liquid
material	13	methacrylate and
material	13	of hydroxyapatite
material	13	of polydopamine
material	13	organometallic polymers
material	13	plasma polymers
material	13	plasma protein
material	13	poly(2-(dimethylamino)ethyl methacrylate
material	13	poly(allylamine hydrochloride
material	13	polymers polystyrenes
material	13	polymers silver
material	13	polyurethane PU
material	13	primary amine
material	13	PVDF membrane
material	13	silver Ag
material	13	silver content
material	13	toluidine blue
material	13	with triclosan
material	13	ZnO and
material	13	antiinfective agent antimicrobial cationic peptide
material	13	nanoparticles silver nanoparticles AgNPs
material	13	acrylic acid resin
material	13	chitosan hyaluronic acid
material	13	loaded with silver
material	13	polyethylene glycols polymers
material	13	silver nanoparticles on
application	13	human umbilical vein endothelial cells
application	13	drug delivery system drug
application	13	human umbilical vein epitthelial
application	13	umbilical vein endothelial cells
application	13	biofilms biomedical equipment
application	13	delicery system drug
application	13	food packaging food
application	13	for marine antifouling
application	13	human umbilical vein
application	13	in an aqueous
application	13	of hospital-acquired infections
application	13	the food industry
application	13	vein endothelial cells
application	13	window
material	13	vinylbenzyl
material	13	vanillin
material	13	urushiol
material	13	UHMWPE
application	13	tomato
material	13	toluidine
material	13	SeaNine
target	13	globosum
material	13	ginseng
material	13	cetyltrimethylammonium
target	12	alga Ulva
application	12	and clinical
application	12	and surgical
target	12	barnacle larvae
application	12	biomedical and
application	12	catheter-related infection
application	12	catheters with
application	12	cherry tomatoes
application	12	cleaning and
application	12	clinical and
application	12	cold storage
application	12	corrosion corrosion
application	12	endotracheal tubes
application	12	food control
application	12	food handling
application	12	fracture fixation
target	12	Halobacterium sp
application	12	implant material
application	12	implants are
application	12	industry and
application	12	infection rates
application	12	infections catheterization
application	12	lenses were
application	12	microbiology food
application	12	of clinical
target	12	of fungal
application	12	of optical
application	12	optical and
application	12	paint bacteria
application	12	paints and
target	12	pathogenic microorganisms
application	12	pollution control
application	12	self-polishing antifouling
application	12	surfaces biomedical
application	12	the floor
application	12	vascular access
application	12	water pollutants
material	12	agents chitosan
material	12	and lysosyme
material	12	bacteria chitin
material	12	benzoic acid
material	12	broad-spectrum antibacterial
material	12	catechol groups
material	12	coli gold
material	12	copolymers and
material	12	derivative methacrylic
material	12	derivative titanium
material	12	fluorine containing
material	12	inorganic salt
material	12	Janus particles
material	12	methacrylate PMMA
material	12	nano silver
material	12	noble metal
material	12	of AgNP
material	12	of gentamicin
material	12	on silicon
material	12	PES membrane
material	12	phosphate coatings
material	12	polymer materials
material	12	polymethacrylic acids
material	12	polypropylene PP
material	12	Pongamia glabra
material	12	propionic acid
material	12	SeaNine 211
material	12	silica coatings
material	12	silicone oil
material	12	silicone surface
material	12	silver is
material	12	soybean oil
material	12	that silver
material	12	the alkyl
material	12	the enzyme
material	12	the N-halamine
material	12	thyme oil
material	12	triclosan-coated sutures
material	12	with TiO2
material	12	wollastonite coatings
material	12	zinc compounds
material	12	zwitterionic sulfobetaine
material	12	silver nanoparticles silver nanoparticles AgNPs
material	12	metal ions metal nanoparticles
material	12	of silver nanoparticles AgNPs
material	12	silver nanoparticles silver nanoparticles
material	12	derivative methacrylic acid
material	12	fluorine containing polymers
material	12	hyaluronic acid HA
material	12	metal ions metal
material	12	silver nanoparticle titanium
material	12	with minocycline and
application	12	antifouling paint bacteria
application	12	in biomedical applications
application	12	of marine fouling
application	12	the implant surface
material	12	wollastonite
material	12	stearic
material	12	pongamia
material	12	polyglycolic
material	12	metalorganic
target	12	glabra
application	11	a ship
target	11	barnacle Balanus
application	11	bone infection
application	11	catheters coatings
application	11	cell patterning
target	11	Chaetomium globosum
application	11	clinical application
application	11	coaning marine
application	11	corrosion resistant
application	11	Foley catheters
application	11	food additives
application	11	implant infection
application	11	implants in
application	11	indwelling medical
application	11	infection sutures
application	11	litter decomposition
application	11	membranes microfiltration
target	11	of barnacles
application	11	of bone
application	11	of fabrics
application	11	of implants
application	11	of orthopedic
application	11	of paint
application	11	of ship
target	11	of Ulva
application	11	on biomedical
application	11	on implants
application	11	osmosis membranes
application	11	pin tract
application	11	prosthesis infection
application	11	prosthetic heart
target	11	Pseudomonas sp
application	11	RO membranes
application	11	surgical mesh
application	11	suture materials
application	11	textile materials
application	11	urinary catheterization
material	11	a silicon
material	11	acid polymer
material	11	adsorption protein
material	11	amphiphilic block
material	11	and silicone
material	11	antifouling polymers
material	11	binding protein
material	11	biofouling coper
material	11	cetyltrimethylammonium bromide
material	11	chlorhexidine; coated
material	11	coatings silver
material	11	cobalt chromium
material	11	copolymer was
material	11	copolymers for
material	11	Cu ions
material	11	dioxide titanium
material	11	extracellular protease
material	11	f-(TA) (GrO)
material	11	fresh ginseng
material	11	gold nanoparticle
material	11	hierarchical polymer
material	11	in polyurethane
material	11	interpenetrating polymer
material	11	ions silver
material	11	metal coatings
material	11	metal organic
material	11	metallic silver
material	11	N-halanine siloxane
material	11	of amino
material	11	of catechol
material	11	of cellulose
material	11	of chlorhexidine
material	11	of polyethylene
material	11	Oriental mustard
material	11	oxide PEO
material	11	p-aramid fibers
material	11	PDMS surface
material	11	PEI and
material	11	polyglycolic acid
material	11	polymer composites
material	11	polymers antimicrobial
material	11	polymers silicones
material	11	polymers to
material	11	silicone hydrogel
material	11	silver zeolite
material	11	single-walled carbon
material	11	sodium salt
material	11	Ti substrates
material	11	Ti surface
material	11	TiO2 coating
material	11	titanium compounds
material	11	trimethyl ammonium
material	11	xN 4
material	11	ZnO NPs
material	11	antimicrobial coatings antimicrobial peptide
material	11	derivative methacrylic acid derivative
material	11	with minocycline and rifampin
material	11	agent metal nanoparticle
material	11	and siler nanoparticles
material	11	bacteria chitin chitosan
material	11	chlorhexidine coated materials
material	11	coating on titanium
material	11	coatings antimicrobial peptide
material	11	cuprous oxide and
material	11	of poly(ethylene glycol
material	11	of silver in
material	11	of the AgNPs
material	11	silver and copper
material	11	silver nanoparticles in
material	11	the antimicrobial peptide
material	11	titanium dioxide X
material	11	volatile organic compounds
application	11	food packaging food preservation
application	11	the risk of infection
application	11	and biomedical devices
application	11	antifouling paint coatings
application	11	biomedical equipment coatings
application	11	for biomedical devices
application	11	indwelling medical devices
application	11	marine antifoulig coating
application	11	of central venous
target	11	of marine bacteria
application	11	of nosocomial infections
application	11	of the marine
application	11	packaging food preservation
application	11	peripherally inserted central
material	11	alkylammonium
target	10	Amphora coffeaeformis
application	10	and dental
application	10	and disinfection
application	10	antibacterial paper
target	10	antibiotic-resistant bacteria
target	10	Balanus improvisus
application	10	balloon catheter
application	10	biocompatible dental
application	10	biotechnological applications
application	10	blood clotting
application	10	catheters are
application	10	catheters CVCs
application	10	coated fabrics
application	10	corrosion of
target	10	drug-resistant bacteria
application	10	food and
target	10	food pathogens
application	10	for orthopedic
application	10	from marine
application	10	fuel cells
application	10	implant coatings
application	10	indwelling catheters
application	10	infections HAIs
application	10	local delivery
application	10	marine and
application	10	marine engineering
application	10	medial technology
application	10	metal implants
application	10	of dental
application	10	of fresh-cut
application	10	of incisional
application	10	of prosthetic
application	10	on implant
application	10	patients were
application	10	prosthetic devices
application	10	pseudomonas infections
application	10	seawater immersion
application	10	self-cleaning coatings
application	10	self-cleaning surfaces
application	10	self-polishing coatings
application	10	slippery surfaces
application	10	surgical instruments
application	10	the catheters
application	10	to ship
material	10	2-hydroxyethyl methacrylate
material	10	a polymeric
application	10	valve sewing
application	10	water supply
material	10	a quartz
target	10	yeast and
material	10	acid silver
material	10	Ag content
material	10	agent silver
material	10	and antibiotic
material	10	and Cu
material	10	and quaternary
material	10	aromatic compounds
material	10	as silver
material	10	bacteria chlorine
material	10	bioactive compounds
material	10	carboxyl groups
material	10	cationic surfactant
material	10	chlorine and
material	10	chromium alloy
material	10	coated polyglactin
application	10	central venous catheters CVCs
application	10	in the food industry
material	10	coatings titanium
material	10	composite resins
application	10	surgical wound infection sutures
material	10	composites were
material	10	copolymers as
material	10	copper compounds
material	10	copper escherichia
material	10	copper in
material	10	coumarin dericatives
material	10	epoxy coatings
material	10	functional polymer
material	10	furanone molecules
material	10	gold surface
material	10	high density
material	10	hydrophilic polymers
material	10	hydroxyapatite HA
material	10	hydroxypropyl methylcellulose
material	10	ions nanoparticles
material	10	like carbon
material	10	matrix composites
material	10	metal surfaces
material	10	metalorganic polymers
material	10	microfibrillated cellulose
material	10	minocycline rifampicin
material	10	noble metals
material	10	of carbon
material	10	of composite
material	10	of copolymers
material	10	of N-halamine
material	10	of PDMS
material	10	of ofpeptide
material	10	of phenolic
material	10	on chitosan
material	10	on silver
material	10	PDMS and
material	10	PET sheets
material	10	PI films
material	10	plastic products
material	10	poly vinyl
material	10	poly(vinylidene fluoride
material	10	polyhexamethylene guanidine
material	10	polymer chain
material	10	polymer for
material	10	polymer protein
material	10	polymerase chain
material	10	polymers containing
material	10	polyvinyl alcohols
material	10	protease production
material	10	protein conformation
material	10	protein fouling
material	10	proteins in
material	10	quaternary pyridinium
material	10	rare earth
material	10	resin and
material	10	resin was
material	10	silicon oxides
material	10	silver derivative
material	10	silver nanocomposites
material	10	SiO2 core-shell
material	10	stearic acid
material	10	steel titanium
material	10	sulfur compounds
material	10	sutures triclosan
material	10	testing metal
material	10	the alloyed
material	10	the chlorinated
material	10	the quaternary
material	10	the Zn
material	10	TiO2 nanotubes
material	10	titanium Ti
material	10	titanium ultraviolet
material	10	to titanium
material	10	transition metals
material	10	urethane acrylate
material	10	whey protein
material	10	of silver nanoparticles on
material	10	of the silver nanoparticles
material	10	a broad spectrum
material	10	acrylic acid derivative
material	10	Ag SiO core-shell
application	10	catheter-related infections catheterization
material	10	cationic antimicrobial peptides
material	10	chitosan coated materials
material	10	cobalt chromium alloy
material	10	diamond like carbon
material	10	ethylene glycol dimethacrylate
application	10	heart valve sewing
application	10	morbidity and mortality
material	10	of copper and
material	10	of copper ions
material	10	of the copper
application	10	on implant surfaces
material	10	polyethylene terephthalate PET
material	10	silicone coatings silicones
material	10	silver in the
material	10	silver ions silver
material	10	silver titanium dioxide
material	10	titanium dioxide titanium
application	10	venous catheters CVCs
application	10	wound infection; sutures
material	10	polymerase
target	10	coffeaeformis

## Sheet: Analyzed words & phrases
Category	Frequency in title-abstract-keywords	Word/phrase
materials	3642	silver (Ag)
target	2228	bacteria
materials	1941	titanium
target	1347	Escherichia coli
materials	1298	copper
materials	1189	Ag nanoparticles
target	1099	Staphylococcus aureus
materials	982	titanium dioxide (TiO2)
materials	887	zinc (Zn)
application	750	infections
materials	738	chitosan (CHI)
materials	667	copolymers
materials	628	metal
materials	624	peptides
application	519	catheters
target	504	microorganisms
application	494	implants
materials	489	polyethylene glycol (PEG)
target	479	Pseudomonas aeruginosa
application	454	marine
materials	413	zinc oxide (ZnO)
application	393	paints
target	383	coli
materials	377	stainless
materials	373	antibiotic
materials	362	silicone
application	356	corrosion
application	353	sutures
materials	341	silicon
materials	337	silica
materials	330	Ag ions
materials	329	quaternary ammonium
materials	326	glycol
target	303	aureus
materials	296	polyurethane
materials	284	carbon
target	275	Staphylococcus epidermidis
target	273	pathogens
application	271	medical devices
materials	267	acrylic
materials	264	gold
application	258	clinical
materials	255	polymeric
materials	253	plastic
materials	250	chloride
materials	249	oil
application	247	food
target	238	methicillin-resistant staphylococcus aureus
application	235	cleaning
materials	232	sodium
materials	230	cellulose
application	227	antifouling paints
application	225	textiles
materials	215	HA
materials	209	graphene
materials	207	methacrylates
materials	205	enzyme
application	203	medical
application	203	ships
application	196	central venous catheters
materials	195	ammonium
materials	189	PDMS
application	189	bone
application	188	hospital
materials	185	plastic coatings
application	183	devices
materials	176	chlorhexidine
target	173	fungi
materials	165	triclosan
target	162	gram-positive bacteria
materials	158	acrylate
application	155	protective coatings
materials	154	antimicrobial peptides
materials	152	silicones
materials	152	calcium
application	151	surgical
target	150	gram-negative bacteria
target	150	diatoms
materials	149	antibiotics
materials	149	metal nanoparticles
application	65	prosthesis
materials	148	glycols
materials	147	vinyl
application	147	biomedical applications
materials	145	epoxy
target	145	algae
application	143	bacterial infections
target	142	bacteria (microorganisms)
materials	140	PEI
application	140	biomedical
materials	139	phosphate
application	94	hulls
materials	134	polyethylene glycols
materials	133	halamine
materials	132	ethyl
materials	127	hydroxyapatite
materials	125	polydopamine
materials	123	Si
materials	123	dopamine
materials	122	metals
materials	118	SiO2
target	118	barnacles
application	118	implantation
materials	116	polyvinyl
materials	116	PDA
materials	116	aluminum
target	116	mussels
materials	115	amino acids
application	115	catheter-related infections
materials	113	polymer coatings
target	113	Candida albicans
materials	111	lysozyme
materials	110	metallic
materials	109	silver nitrate (AgNO3)
materials	108	chlorine
materials	106	gentamicin
application	106	surgery
materials	104	methyl
materials	104	quartz
target	104	Listeria monocytogenes
application	102	medical applications
materials	101	GO
materials	101	poly(ethylene glycol)
application	101	marine environment
materials	100	ether
application	69	orthopedic
materials	98	PS
materials	98	polyurethanes
materials	97	vancomycin
materials	97	acetate
materials	96	styrene
materials	96	graphene oxide
materials	95	polystyrene
materials	95	catechol
target	95	viruses
materials	94	TBT
materials	94	PET
materials	93	polypropylene
materials	93	PAA
materials	93	metal ions
target	93	Bacillus subtilis
materials	92	fluorinated
materials	91	silane
materials	91	polyethyleneimine
materials	91	bromide
materials	91	alkyl
target	91	aeruginosa
materials	89	ammonium compounds
materials	88	polyester
materials	87	PMMA
application	87	packaging
materials	85	lactic
materials	85	acid derivative
materials	84	alcohol
application	84	food packaging
materials	83	polydimethylsiloxane
materials	83	macrogol
materials	82	hyaluronic
materials	81	nitrogen
target	81	Salmonella
target	80	Staphylococcus
materials	79	ZnO nanoparticles
materials	77	siloxane
materials	77	enzymes
materials	76	surfactant
target	76	Ulva
target	76	yeasts
application	75	biomedical devices
application	75	shelf life
materials	74	sulfobetaine
materials	74	PES
materials	74	CHX
materials	74	ammonium salt
materials	73	QAS
materials	73	methacrylic
materials	73	ceramic
materials	73	zwitterionic polymers
materials	72	block copolymers
materials	72	ethylene glycol
application	72	panels
materials	71	PEO
materials	71	nitrate
materials	71	nisin
materials	71	butyl
materials	71	blue
target	71	spores
materials	70	quaternary ammonium salt
application	70	implant-associated infections
materials	69	minocycline
materials	68	gelatin
materials	68	diamond
application	68	drug delivery systems
materials	67	hyaluronic acid (HA)
application	67	health care
materials	66	copper oxide
materials	66	PVC
target	66	Enterococcus faecalis
materials	65	heparin
materials	65	fluorine
application	65	sensors
materials	63	antimicrobial cationic
materials	62	polyethylene
materials	62	DLC
materials	62	cyclodextrin
materials	62	AMP
materials	62	titanium surfaces
application	62	biomedical equipment
application	62	food preservation
materials	61	melimine
materials	61	ciprofloxacin
materials	61	chitin
materials	61	carboxylic
materials	61	Ca
materials	61	silver coatings
application	61	urinary tract infections
materials	60	starch
materials	60	PU
application	60	drug delivery
application	60	intensive care
application	60	implanted
materials	59	phosphorylcholine
materials	59	dimethylamino
materials	59	cement
materials	58	cuprous
materials	58	amines
materials	58	allyl
application	58	underwater
application	58	edible coatings
materials	57	alginate
materials	57	titanium alloys
materials	57	polyacrylic acid (PAA)
target	57	epidermidis
target	57	Listeria
target	57	planktonic
target	57	staphylococcal
target	57	mold
application	40	healing
application	57	wounds
application	56	catheterization
materials	55	polysaccharides
materials	55	ester
materials	55	anhydride
materials	55	lactic acid
materials	55	silicon dioxide
target	55	marine organisms
application	55	water treatment
application	55	fruit
application	55	endotracheal
application	55	AF
materials	54	zeolite
materials	54	silanes
materials	54	oils
materials	54	nickel
materials	54	acrylamide
materials	54	ammonium derivative
target	54	cyprids
application	54	tubes
application	54	milk
application	54	inflammatory
application	54	dental implants
materials	53	potassium
materials	53	nitric
materials	53	DMAEMA
materials	53	gold nanoparticles
target	53	Thoracica
application	53	nosocomial infections
materials	52	terephthalate
target	52	Bacillus
application	52	marine fouling
application	52	oral
application	52	dye
application	52	ship hulls
materials	51	PMOXA
materials	51	esters
materials	51	acrylic acid
target	51	Pseudomonas
target	51	Candida
application	51	vessels
materials	50	pyridinium
materials	50	PE
materials	50	acrylic monomers
materials	50	chitosan coatings
materials	50	chlorine compounds
materials	50	cuprous oxide
materials	50	quaternary ammonium derivative
application	50	antibiotic resistance
materials	49	polyacrylic
materials	49	plastics
materials	49	latex
materials	49	extracts
materials	49	dimethyl
materials	49	AMPs
application	49	bloodstream
materials	48	ethylene
materials	48	PVP
materials	48	peroxide
materials	48	molybdenum
materials	48	metal nanoparticle
materials	48	poly(methyl methacrylate)
materials	48	antibacterial polymers
application	48	fracture
application	48	biosensors
application	48	prosthesis-related infections
materials	47	sulfate
materials	47	polyesters
materials	47	furanone
materials	47	fluoride
materials	47	nitric oxide
materials	47	organic acids
application	47	delivery system
application	47	staphylococcal infections
application	47	vascular
application	47	bloodstream infections
materials	46	PVDF
materials	46	polyglactin
materials	46	polyethylenimine
materials	46	polyaniline
materials	46	hydrochloride
materials	46	macrogol derivative
application	46	prosthetic
application	46	hospital-acquired infections
materials	45	PVA
materials	45	polyethylenes
materials	45	PCL
materials	45	hydroxyethyl
materials	45	glycidyl
materials	45	chitin chitosan
materials	45	fatty acids
materials	45	carbocylic acid
target	45	Klebsiella pneumoniae
application	45	surgical site infections
materials	44	sulfadiazine
materials	44	PDMAEMA
materials	44	ammonium salts
materials	44	quaternary ammonium compounds
target	44	Balanus amphitrite
application	44	marine antifouling coatings
materials	43	tannin
materials	43	cysteine
materials	43	carbonate
materials	43	essential oil
materials	43	silver chloride (AgCl)
target	43	pathogenic bacteria
application	43	infection prevention
materials	42	urethane
materials	42	polysiloxane
materials	42	polypeptide
materials	42	NP
materials	42	lipid
materials	42	glycerol
materials	42	curcumin
materials	42	hydrogen peroxide
application	42	marine antifouling
application	42	marine applications
materials	41	quaternary
materials	41	propyl
materials	41	oxazoline
materials	41	isothiocyanate
materials	41	CS
materials	41	calcium phosphate
materials	41	polyethylene glycol
target	41	Listeria innocua
materials	40	TA
materials	40	RGO
materials	40	polyglycerol
materials	40	phenolic
materials	40	Au
materials	40	cationic peptodes
materials	40	quaternary ammonium salts
application	40	infection control
application	40	stents
application	40	ortophedic implants
materials	39	sorbate
materials	39	PLL
materials	39	penicillium
materials	39	lysine
materials	39	laccase
materials	39	fatty
materials	39	azide
materials	39	silver surface
target	39	monocytogenes
application	39	edible
application	27	indwelling
application	39	contact lenses
application	39	wastewater
application	39	meat
materials	38	polystyrenes
materials	38	penicillin
materials	38	organometallic
materials	38	hema
materials	38	dendrimers
materials	38	silica nanoparticles
target	38	Salmonella typhimurium
application	38	urinary
application	38	equipment contamination
application	38	marine coatings
materials	37	polyethersulfone
materials	37	chlorinated
materials	37	ceramics
materials	37	capsaicin
materials	37	carbon nanotubes
materials	37	clycol peg
materials	37	methacrylic acid derivative
materials	37	polyurethane coatings
target	37	Salmonella enterica
target	37	Streptococcus mutans
application	37	implant surfaces
application	37	marine biofouling
application	37	urinary catheters
materials	36	tertiary
materials	36	rosin
materials	36	polysaccharide
materials	36	PLA
materials	36	montmorillonite
materials	36	iodine
materials	36	iodide
materials	36	polyvinyl alcohol
target	36	Aspergillus niger
application	36	cross infection
application	36	tooth
application	36	implantable
application	36	fruits
application	36	ETT
application	36	drug carriers
materials	35	VP
materials	35	polyamide
materials	35	PA
materials	35	Ni
materials	35	MPC
materials	35	collagen
materials	35	betaine
materials	35	acrylates
materials	35	cellulose acetate
materials	35	ionic liquids
materials	35	polyethylene oxides
materials	35	polymer blends
materials	35	polymer silver
materials	35	silver sulfadiazine
materials	35	silicon dioxide silver
application	35	delivery systems
application	35	industrial applications
application	35	solar
application	35	RO
application	35	hygiene
application	35	filters
application	35	device-associated infections
materials	34	rifampicin
materials	34	QA
materials	34	polycarbonate
materials	34	methylene
materials	34	antimicrobial polymers
materials	34	block copolymer
materials	34	chitosan coating
materials	34	disinfectant agent
materials	34	sodium chloride
target	34	Aspergillus
target	34	Escherichia coli O157: H7
materials	33	tannic
materials	33	SWNT
materials	33	pyridine
materials	33	PP
materials	33	porphyrin
materials	33	polymethyl
materials	33	phenols
materials	33	medetomidine
materials	33	magnesium
materials	33	dimethylsiloxane
materials	33	Cr
materials	33	amide
materials	33	antimicrobial cationic peptides
materials	33	ethylene ethylene glycol
target	33	innocua
materials	32	protease
materials	32	Br
materials	32	benzoate
materials	32	ammonium chloride
materials	32	diamond-like carbon
materials	32	organic compounds
materials	32	polydimethylsiloxane PDMS
materials	32	waterborne polyurethane
materials	32	silver loaded
application	29	dressings
application	32	corrrosion protection
application	32	food safety
application	32	medicine
application	32	intubation
application	32	anticorrosive
application	32	allograft
materials	31	violet
materials	31	polylactic
materials	31	maleic
materials	31	cinnamaldehyde
materials	31	carboxyl
materials	31	cationic peptide
materials	31	oligo(ethylenene glycol
materials	31	organic polymers
target	31	Navicula
application	31	bacterial contamination
application	31	surgical wound infection
application	31	heart
application	31	anticorrosion
materials	30	soybean
materials	30	polyurethan
materials	30	octenidine
materials	30	clay
materials	30	caprolactone
materials	30	alumina
materials	30	ether methacrylate
materials	30	titanium implants
target	30	marine bacteria
application	30	dental
application	30	SSI
application	30	mats
materials	29	pSBMA
materials	29	polypropylenes
materials	29	methacryloyloxyethyl
materials	29	LF
materials	29	graphite
materials	29	ethers
materials	29	aromatic
materials	29	containing silver
materials	29	tannic acid
materials	29	silver titanium dioxide
target	29	Pseudomonas putida
application	29	contact lens
application	29	medical implants
application	29	microbial contamination
application	29	implant materials
application	29	indwelling catheters
materials	28	rifampin
materials	28	polylactide
materials	28	polyimide
materials	28	PHMG
materials	28	PC
materials	28	guanidine
materials	28	EO
materials	28	copper nanoparticles
materials	28	polypeptide antibiotic
materials	28	silver titanium
materials	28	chitin chitosan coatings
materials	28	polypeptide antibiotic agent
target	28	albicans
target	28	Bacillus cereus
application	28	care unit
application	28	subcutaneous
application	28	sepsis
application	28	screws
application	28	meshes
materials	27	PAS
materials	27	isopropylacrylamide
materials	27	iron
materials	27	hypochlorite
materials	27	dextran
materials	27	CMC
materials	27	chromium
materials	27	CD
materials	27	carvacrol
materials	27	carrageenan
materials	27	carboxymethyl
materials	27	methyl ether
materials	27	polylactic acid
materials	27	TiO2 nanoparticles
application	27	central venous
application	27	wastewater treatment
application	27	intensive care unit
application	27	SPC
application	27	denture
materials	26	triazole
materials	26	terpolymers
materials	26	terpolymer
materials	26	selenium
materials	26	polypeptides
materials	26	polyols
materials	26	PI
materials	26	methacrylamide
materials	26	hydantoin
materials	26	halamines
materials	26	citrate
materials	26	allylamine
materials	26	alkyl chain
materials	26	oxide nanoparticles
materials	26	polymethyl methacrylate
materials	26	quantum dots
materials	26	silver particles
application	26	artificial membrane
application	26	surgical infection
application	26	wound dressings
application	26	wound healing
application	26	pigments
materials	25	sulfur
materials	25	SB
materials	25	PSS
materials	25	PLLA
materials	25	PANI
materials	25	coatings copper
materials	25	essential oils
materials	25	glycol methyl
materials	25	peptides (AMPs)
materials	25	silver compounds
materials	25	antimicrobial cationic peptide
materials	25	antimicrobial peptides AMPs
materials	25	glycol methyl ether
target	25	Streptococcus
target	25	Ulva linza
target	25	microalgae
application	25	catheter-related bloodstream
application	25	food storage
application	25	packaging materials
application	25	wires
application	25	stent
materials	24	vinylpyridine
materials	24	terephthalates
materials	24	TC
materials	24	polymethacrylic
materials	24	PEGMA
materials	24	HAP
materials	24	halloysite
materials	24	formaldehyde
materials	24	ampicillin
materials	24	allyl isothiocyanate
materials	24	cationic polymers
materials	24	gold surfaces
materials	24	methylene blue
materials	24	polyethylene terephthalates
materials	24	potassium sorbate
materials	24	terephthalate (PET)
materials	24	zinc zinc
target	24	Enterococcus
target	24	Acinetobacter baumannii
application	24	and industrial
application	24	antibiotic prophylaxis
application	24	food processing
application	24	pharmaceutical
application	24	CV
materials	23	QAC
materials	23	platinum
materials	23	Nb
materials	23	mercury
materials	23	hydroxypropyl
materials	23	DMA
materials	23	chlorides
materials	23	biopolymer
materials	23	bacteriophages
materials	23	epoxy resins
materials	23	maleic anhydride
materials	23	mesoporous silica
materials	23	poly(ethylene terephthalate
materials	23	silicone derivative
target	23	Pseudomonas fluorescens
target	23	Lactobacillus
application	23	antimicrobial packaging
application	23	environmental monitoring
application	23	sterile
application	23	dermatitis
application	23	implant coating
materials	22	tannins
materials	22	silicate
materials	22	SBMA
materials	22	polytetrafluoroethylene
materials	22	PAH
materials	22	MMA
materials	22	LL-37
materials	22	HPG
materials	22	GS
materials	22	furanones
materials	22	cyclodextrins
materials	22	carboxybetaine
materials	22	copper ions
materials	22	polydopamine PDA
materials	22	silane derivative
application	22	endotracheal tube
application	22	food industry
application	22	vegetable
application	22	preservative
application	22	HAIs
application	22	BSI
materials	21	Zr
materials	21	trioxide
materials	21	methylcellulose
materials	21	maleimide
materials	21	ILs
materials	21	detergent
materials	21	Cys
materials	21	boron
materials	21	2-(Dimethylamino)Ethyl Methacrylate
materials	21	acrylic resins
materials	21	carbon nanotube
materials	21	copper coatings
materials	21	epoxy resin
materials	21	polymer surface
materials	21	titanium oxide
materials	21	titanium substrates
target	21	faecalis
target	21	jejuni
application	21	biomedical implants
application	21	food preservatives
application	21	fouling prevention
application	21	water pollution
application	21	ventilation
application	21	turkey
application	21	transplantation
application	21	papaya
application	21	hernia
application	21	cantaloupes
materials	20	whey
materials	20	trimethoxysilyl
materials	20	PTFE
materials	20	polysulfone
materials	20	PNIPAAm
materials	20	MEL
materials	20	GMA
materials	20	glycine
materials	20	fluorocarbon
materials	20	epoxide
materials	20	DOPA
materials	20	arginine
materials	20	aluminium
materials	20	alloyed
materials	20	antifouling polymer
materials	20	antimicrobial polymer
materials	20	coating copper
materials	20	crystal violet
materials	20	glycol methacrylate
materials	20	glycols polyethylene
materials	20	graft copolymers
materials	20	heavy metals
materials	20	ions metal
materials	20	methyl methacrylate
materials	20	pes membranes
materials	20	reduced graphene
materials	20	silica surface
target	20	Pseudoalteromonas
application	20	bone cement
application	20	contact dermatitis
application	20	endotracheal intubation
application	20	fuel consumption
application	20	heart valve
application	20	RTE
application	20	orthoses
application	20	maritime
application	20	apples
materials	19	trimethylammonium
materials	19	tetracycline
materials	19	steels
materials	19	SPI
materials	19	sorbic
materials	19	SnO2
materials	19	polycaprolactone
materials	19	polyacrylates
materials	19	PFA
materials	19	PEOX
materials	19	magnetite
materials	19	lactide
materials	19	coumarin
materials	19	AIT
materials	19	calcium carbonate
materials	19	hyperbranched polyglycerol
materials	19	methacrylate polymer
materials	19	sorbic acid
materials	19	transition metal
materials	19	glycol methyl ether methacrylate
materials	19	poly(ethylene glycol methyl ether
materials	19	polyethylene glycols polyethylene oxides
materials	19	glycols; polyethylene oxides
materials	19	methyl ether methacrylate
materials	19	poly(ethylene glycol methyl
materials	19	poly(ethylene glycol PEG
materials	19	poly(ethylene glycols polyethylene
target	19	marine bacterium
target	19	zoospores
application	19	and optical
application	19	tooth implant
application	19	ventilator
application	19	respiratory
application	19	peritonitis
application	19	coastal
materials	18	vinylidene
materials	18	trimethyl
materials	18	sulfone
materials	18	rose
materials	18	pyrrolidone
materials	18	propylene
materials	18	polyvinylchloride
materials	18	polyhexamethylene
materials	18	PLGA
materials	18	ofloxacin
materials	18	CTAB
materials	18	bromine
materials	18	aniline
materials	18	aminopropyl
materials	18	alcohols
materials	18	acetic
materials	18	acetates
materials	18	2-methacryloyloxyethyl phosphorylcholine
materials	18	cotton cotton
materials	18	heavy metal
materials	18	molybdenum trioxide
materials	18	proteins surface
materials	18	silicon compounds
materials	18	steel SS
target	18	Enterococcus faecium
target	18	staphylococci
target	18	plaque
target	18	phytoplankton
application	18	air conditioning
application	18	care units
application	18	pharmacology pharmacology
application	18	umbilical vein
application	18	vein endothelial
application	18	antifouling device coating
application	18	umbilical vein endothelial
application	18	harbour
application	18	fillets
application	18	ETTs
materials	17	zeolites
materials	17	trimethoxysilane
materials	17	thyme
materials	17	TAPP
materials	17	SNPs
materials	17	PSf
materials	17	PGA
materials	17	parylene
materials	17	oleic
materials	17	mustard
materials	17	MMT
materials	17	MgO
materials	17	levofloxacin
materials	17	lauric
materials	17	gentamicins
materials	17	fluoropolymers
materials	17	dimethacrylate
materials	17	diisocyanate
materials	17	citrus
materials	17	cinnamon
materials	17	bengal
materials	17	alginic
materials	17	alginic acid
materials	17	chloride PVC
materials	17	dioxide silver
materials	17	glycidyl methacrylate
materials	17	metal oxides
materials	17	polyurethane coating
materials	17	rose bengal
materials	17	silica particles
materials	17	silicone hydrogels
materials	17	silver nanoclusters
materials	17	zinc coatings
materials	17	Chlorine compounds Coatings
target	17	Acinetobacter
target	17	Clostridium difficile
target	17	Cobetia marina
target	17	planktonic bacteria
application	17	wound infection
application	17	catheter surface
application	17	flame retardant
application	17	staphylococcus infeciton
application	17	tomatoes
application	17	PPE
application	17	naval
application	17	limestone
application	17	diagnosis
application	17	clothing
application	17	cherry
application	17	boats
materials	16	methacrylic acid
materials	16	toluene
materials	16	siloxanes
materials	16	porphyrins
materials	16	polylysine
materials	16	PGLD
materials	16	glutaraldehyde
materials	16	bromides
materials	16	berberine
materials	16	AuNPs
materials	16	arsenic
materials	16	aminopropyltriethoxysilane
materials	16	acetic acid
materials	16	aluminum coatings
materials	16	aluminum oxide
materials	16	ammonium compounds
materials	16	coatings polymers
materials	16	graphene oxides
materials	16	metal oxide
materials	16	poly(sulfobetaine methacrylate
materials	16	polymeric substances
materials	16	silicon surface
materials	16	sodium benzoate
materials	16	tertiary amine
materials	16	titatinum implant
materials	16	vinyl acetate
materials	16	antiinfective agent copper
materials	16	polyethylene glycol PEG
materials	16	zinc zinc oxide
target	16	Amphora
target	16	green alga
target	16	Proteus mirabilis
application	16	antimicrobial-coated catheters
application	16	biofilm catheter
application	16	broad-spectrum antimicrobial
application	16	foul-release coatings
application	16	implant failure
application	16	minimally processed
application	16	vascular grafts
application	16	water filtration
application	16	intensive care units
application	16	pad
application	16	nails
application	16	intravenous
materials	15	Tet213
materials	15	zirconia
materials	15	thiazole
materials	15	thermoplastic
materials	15	SWNTs
materials	15	Se
materials	15	pyrithione
materials	15	propionic
materials	15	polychelates
materials	15	phosphorus
materials	15	nitrofurazone
materials	15	janus
materials	15	HPMC
materials	15	diazonium
materials	15	diallyldimethylammonium
materials	15	catechin
materials	15	butenolide
materials	15	benzoic
materials	15	acrylic resin
materials	15	alcohol PVA
materials	15	copper ion
materials	15	copper surfaces
materials	15	glycols polymerization
materials	15	methacrylate DMAEMA
materials	15	modified chitosan
materials	15	nanoparticle titanium
materials	15	oleic acid
materials	15	polyethyleneimine PEI
materials	15	polymeric materials
materials	15	polystyrene derivative
materials	15	silica nanoparticle
materials	15	silica silver
materials	15	titanium unclassified
materials	15	antiinfective agent chitosan
materials	15	minocycline and rifampin
materials	15	polyethylene glycols polymerization
materials	15	quaternary ammonium groups
target	15	mutans
target	15	bacterial pathogens
target	15	Phaeodactylum tricornutum
target	15	Streptococcus gordonii
target	15	MSSA
target	15	influenza
target	15	bacilli
application	15	aqueous environment
application	15	catheter material
application	15	clinical applications
application	15	hospital infection
application	15	human umbilical
application	15	marine pollution
application	15	public health
application	15	ultra-filtration membranes
application	15	central venous catheterization
application	15	topical antiinfective agent
materials	14	zirconium
materials	14	vanadium
materials	14	tungsten
materials	14	polyvinylidene
materials	14	polyamines
materials	14	polyamine
materials	14	PG
materials	14	perfluoropolyether
materials	14	organosilicon
materials	14	natamycin
materials	14	methacryloyloxy
materials	14	gendine
materials	14	flavonoids
materials	14	ethylenediamine
materials	14	dimeticone
materials	14	cobalt
materials	14	citric
materials	14	cephalosporin
materials	14	bisphenol
materials	14	carbon films
materials	14	chitosan hyaluronic
materials	14	copper alloy
materials	14	diffraction zinc
materials	14	halloysite nanotubes
materials	14	hydrogel coatings
materials	14	oxide GO
materials	14	phenolic compounds
materials	14	poly(ethylene oxide
materials	14	polyethersulfone membrane
materials	14	polyurethane acrylates
materials	14	polyvinyl chlorides
materials	14	silicon oxide
materials	14	silicon surfaces
materials	14	sodium hypochlorite
materials	14	TiO2 coatings
materials	14	titanium oxides
materials	14	poly(ethylene glycol) methyl ether methacrylate
materials	14	antibactrerial activity antibiotic
materials	14	copper and zinc
materials	14	graphene oxide GO
materials	14	ions metal nanoparticles
materials	14	poly(ethylene terephthalate PET
materials	14	polyvinyl chloride PVC
materials	14	quaternary ammonium compound
materials	14	reduced graphene oxide
target	14	Alternaria alternata
target	14	Amphibalanus amphitrite
target	14	marine algae
target	14	Porphyromonas gingivalis
target	14	plankton
target	14	Mytilus
target	14	enterococci
target	14	Cylindrotheca
target	14	cinerea
application	54	nosocomial
application	14	catheter colonization
application	14	medical textiles
application	14	ultrafiltration membranes
application	14	water purification
application	14	wound closure
application	14	antibiotic resistance article
application	14	catheter-associated urinary tract
application	14	clabsi
application	14	burn
materials	13	vinylbenzyl
materials	13	vanillin
materials	13	urushiol
materials	13	UHMWPE
materials	13	toluidine
materials	13	SeaNine
materials	13	ginseng
materials	13	cetyltrimethylammonium
materials	13	acrylic monomer
materials	13	carboxymethyl cellulose
materials	13	cellulose cellulose
materials	13	chitosan coated
materials	13	citric acid
materials	13	coatings polymer
materials	13	coatings silicones
materials	13	containing polymers
materials	13	copper alloys
materials	13	copper coating
materials	13	copper oxides
materials	13	diblock copolymer
materials	13	glycol dimethacrylate
materials	13	glycols polymers
materials	13	ionic liquid
materials	13	organometallic polymers
materials	13	plasma polymers
materials	13	plasma protein
materials	13	poly(2-(dimethylamino)ethyl methacrylate
materials	13	poly(allylamine hydrochloride
materials	13	polymers polystyrenes
materials	13	polyurethane PU
materials	13	primary amine
materials	13	PVDF membrane
materials	13	toluidine blue
materials	13	acrylic acid resin
materials	13	chitosan hyaluronic acid
materials	13	polyethylene glycols polymers
target	13	niger
target	13	barnacle cyprids
application	13	bone regeneration
application	13	dental prostheses
application	13	denture base
application	13	food products
application	13	food quality
application	13	inflammatory response
application	13	orthopedic surgery
application	13	product safety
application	13	textile industry
application	13	water quality
application	13	human umbilical vein
application	13	vein endothelial cells
application	13	window
application	13	tomato
materials	12	wollastonite
materials	12	stearic
materials	12	pongamia
materials	12	polyglycolic
materials	12	metalorganic
materials	12	bacteria chitin
materials	12	benzoic acid
materials	12	broad-spectrum antibacterial
materials	12	catechol groups
materials	12	coli gold
materials	12	fluorine containing
materials	12	inorganic salt
materials	12	Janus particles
materials	12	methacrylate PMMA
materials	12	noble metal
materials	12	PES membrane
materials	12	phosphate coatings
materials	12	polymer materials
materials	12	polymethacrylic acids
materials	12	polypropylene PP
materials	12	Pongamia glabra
materials	12	propionic acid
materials	12	SeaNine 211
materials	12	silica coatings
materials	12	silicone oil
materials	12	silicone surface
materials	12	soybean oil
materials	12	thyme oil
materials	12	triclosan-coated sutures
materials	12	wollastonite coatings
materials	12	zinc compounds
materials	12	zwitterionic sulfobetaine
materials	12	fluorine containing polymers
materials	12	metal ions metal
materials	12	silver nanoparticle titanium
target	12	barnacle larvae
target	12	Halobacterium sp
target	12	pathogenic microorganisms
application	12	cherry tomatoes
application	12	cold storage
application	12	endotracheal tubes
application	12	food control
application	12	food handling
application	12	fracture fixation
application	12	infection rates
application	12	pollution control
application	12	self-polishing antifouling
application	12	vascular access
application	12	water pollutants
materials	11	alkylammonium
materials	11	acid polymer
materials	11	adsorption protein
materials	11	amphiphilic block
materials	11	antifouling polymers
materials	11	binding protein
materials	11	cetyltrimethylammonium bromide
materials	11	chlorhexidine; coated
materials	11	cobalt chromium
materials	11	Cu ions
materials	11	extracellular protease
materials	11	f-(TA) (GrO)
materials	11	fresh ginseng
materials	11	gold nanoparticle
materials	11	hierarchical polymer
materials	11	interpenetrating polymer
materials	11	metal coatings
materials	11	metal organic
materials	11	metallic silver
materials	11	N-halanine siloxane
materials	11	Oriental mustard
materials	11	oxide PEO
materials	11	p-aramid fibers
materials	11	PDMS surface
materials	11	polyglycolic acid
materials	11	polymer composites
materials	11	polymers antimicrobial
materials	11	polymers silicones
materials	11	silicone hydrogel
materials	11	silver zeolite
materials	11	single-walled carbon
materials	11	sodium salt
materials	11	Ti substrates
materials	11	Ti surface
materials	11	TiO2 coating
materials	11	titanium compounds
materials	11	trimethyl ammonium
materials	11	xN 4
materials	11	antimicrobial coatings antimicrobial peptide
materials	11	bacteria chitin chitosan
materials	11	chlorhexidine coated materials
materials	11	coatings antimicrobial peptide
materials	11	volatile organic compounds
target	11	subtilis
target	11	typhimurium
target	11	Chaetomium globosum
target	11	Pseudomonas sp
application	11	bone infection
application	11	catheters coatings
application	11	cell patterning
application	11	clinical application
application	11	corrosion resistant
application	11	Foley catheters
application	11	food additives
application	11	litter decomposition
application	11	membranes microfiltration
application	11	osmosis membranes
application	11	pin tract
application	11	prosthetic heart
application	11	RO membranes
application	11	surgical mesh
application	11	textile materials
application	11	urinary catheterization
application	11	biomedical equipment coatings
application	11	indwelling medical devices
materials	10	polymerase
materials	10	2-hydroxyethyl methacrylate
materials	10	acid silver
materials	10	aromatic compounds
materials	10	bacteria chlorine
materials	10	bioactive compounds
materials	10	carboxyl groups
materials	10	cationic surfactant
materials	10	chromium alloy
materials	10	coated polyglactin
materials	10	coatings titanium
materials	10	composite resins
materials	10	copper compounds
materials	10	coumarin dericatives
materials	10	epoxy coatings
materials	10	functional polymer
materials	10	furanone molecules
materials	10	gold surface
materials	10	high density
materials	10	hydrophilic polymers
materials	10	hydroxyapatite HA
materials	10	hydroxypropyl methylcellulose
materials	10	ions nanoparticles
materials	10	matrix composites
materials	10	metal surfaces
materials	10	metalorganic polymers
materials	10	microfibrillated cellulose
materials	10	minocycline rifampicin
materials	10	noble metals
materials	10	PET sheets
materials	10	PI films
materials	10	plastic products
materials	10	poly vinyl
materials	10	poly(vinylidene fluoride
materials	10	polyhexamethylene guanidine
materials	10	polymer chain
materials	10	polymer protein
materials	10	polymerase chain
materials	10	polymers containing
materials	10	polyvinyl alcohols
materials	10	protease production
materials	10	protein conformation
materials	10	protein fouling
materials	10	quaternary pyridinium
materials	10	rare earth
materials	10	silicon oxides
materials	10	silver derivative
materials	10	silver nanocomposites
materials	10	SiO2 core-shell
materials	10	stearic acid
materials	10	steel titanium
materials	10	sulfur compounds
materials	10	TiO2 nanotubes
materials	10	titanium ultraviolet
materials	10	transition metals
materials	10	urethane acrylate
materials	10	whey protein
materials	10	acrylic acid derivative
materials	10	Ag SiO core-shell
materials	10	cationic antimicrobial peptides
materials	10	chitosan coated materials
materials	10	cobalt chromium alloy
materials	10	diamond like carbon
materials	10	ethylene glycol dimethacrylate
materials	10	polyethylene terephthalate PET
materials	10	silicone coatings silicones
target	10	Balanus
target	10	Klebsiella
target	10	Amphora coffeaeformis
target	10	antibiotic-resistant bacteria
target	10	Balanus improvisus
target	10	drug-resistant bacteria
target	10	food pathogens
application	10	antibacterial paper
application	10	balloon catheter
application	10	biotechnological applications
application	10	blood clotting
application	10	coated fabrics
application	10	fuel cells
application	10	local delivery
application	10	marine engineering
application	10	medial technology
application	10	metal implants
application	10	prosthetic devices
application	10	pseudomonas infections
application	10	seawater immersion
application	10	self-cleaning coatings
application	10	self-cleaning surfaces
application	10	self-polishing coatings
application	10	slippery surfaces
application	10	surgical instruments
application	10	valve sewing
application	10	water supply
application	10	heart valve sewing
