# Supplementary material for: Potential ecotoxicological effects of antimicrobial surface coatings: a literature survey backed up by analysis of market reports
Source: PeerJ. 2019 Feb 11;7:e6315. doi: 10.7717/peerj.6315 (PMC6375256; doi:10.7717/peerj.6315)
Supplement: Supplemental Information 3 [file peerj-07-6315-s003.xlsx]

## Sheet: Silver
Search phrase:	( ( ( TITLE-ABS-KEY ( "antimicrob* coat*" ) OR TITLE-ABS-KEY ( "antibact* coat*" ) OR TITLE-ABS-KEY ( "antimicrob* surface*" ) OR TITLE-ABS-KEY ( "antibact* surface*" ) OR TITLE-ABS-KEY ( "biocid* surface*" ) OR TITLE-ABS-KEY ( "biocid* coat*" ) OR TITLE-ABS-KEY ( "antibiof* surface*" ) OR TITLE-ABS-KEY ( "antibiof* coat*" ) OR TITLE-ABS-KEY ( "antivir* surface*" ) OR TITLE-ABS-KEY ( "antivir* co…
Material	Release medium and conditions (solution, dry abrasion, cleaning product etc)	Dissolution or shedding of particles; triggered/intentional or unconrolled continuous release/shedding	What was released and in which amount	DOI
IN VITRO:Radioactive Ag nanoparticle-coated PE-BAX polyamide catheters, 2 concentrations - 600microg/g catheter (avg cath weight 336 ± 5 mg, length 69.2 ± 1.1 cm) and 1000microg/g catheter (avg cath weight 348 ± 4 mg, length 71.7 ± 0.7 cm); IN VIVO: C57Bl/6J male mice implanted with 28 cm of radioactive Ag nanoparticle-coated catheters (total 221.7 ± 0.8 µg of silver); 14 catheter segments, 2 cm …	IN VITRO: Catheters fully immersed in Saline (PBS?), at 37°C for 10 days; IN VIVO: Urine, faeces sampled for 10 days; organs and tissues sampled for silver leakage and sequestration at the end of experiment	uncontrolled ion release	IN VITRO: 10 day average: 24.1 ± 2.4 ng/cm/day(catheters coated with 600 µg/g silver),45.1 ± 1.1 ng/cm/day(catheters coated with 1000 µg/g silver);total release-0.38 ± 0.03 µg/cm(14% of coated silver) for 600mg/cm and0.45 ± 1.1 µg/cm(9% of coated silver) for 1000mg/cm IN VIVO: urine - 0.02 µg/day, i.e. <0.01% of the silver implanted, total over 10 days - 0.22 ± 0.04 µg, 0.1% of the silver implant…	https://doi.org/10.1093/jac/dkn034				1
Ag–chitosan monolayer coating (prepared from 0.5 g/L chitosan-1 mM AgNO3 solution) and hydroxyapatite-chitosan/Ag-chitosan bilayer coating (prepared from 1 g/L HA, 0.5 g/L chitosan-1 mM AgNO3 solution) on stainless steel (3 × 6 cm2)	20 mL of high purity water	uncontrolled ion release	Ag ions; Ag-chitosan monolayer coating release - final Ag+ concentration in high purity water = 30 ppm after 300 h (plateau reached at 12 h); HA-Ag-chitosan coating final concentration - 1 ppm afer 300 h	https://doi.org/10.1016/j.surfcoat.2008.01.022				2
30 mm spherical cover glasses covered with poly-L-lysine/hyaluronic acid film and AgNO3 encapsulated in liposomes	1 mL of 10 mM HEPES buffer (pH 7.4, 150 mM NaNO3)	uncontrolled ion release at RT/ enhanced ion release at 37 C/ coating degradation at 4 C	Ag ions; no Ag detected in HEPES supernatants after 3 h incubation at RT; 54 +/-17% of total coated silver detected after 90 min at 37 C; 100% Ag released after 15 h incubation. 32% of total coated silver remains after 5 days at 4 C	10.1021/la8014755				3
Ti6Al4V discs coated with glass polyalkenoate cement (GPC) containing Ag2O (0.33 mol. percentage) and ZnO (33 mol. percentage)	immersed in up to 65 mL of purified water	uncontrolled ion release	Ion release measured after 1, 7 and 30 days; Ag ions - 0.2 ppm released within 24 h, additional 0.1 ppm released over 30 days (below biocidal concentration of 3.25 ppm); Zn ions - 1.5 ppm released in 24 h, another 1 ppm after 7 days, final 1 ppm released in 30 days (biocidal conc. - >6.53 × 10−4 ppm	https://doi.org/10.1007/s10856-008-3519-x				4
silver nanoparticle-loaded hyperbranched polyethyleneimine coating on poly(ethylene terephthalate); Ag/N ratio between 1:4 and 1:64; between 2 and 15 wt% of silver in total coating	water, pH = 3.5	uncontrolled ion release	Ag ions; 0.05 mg/L in eluate after 4h, 0.07 mg/L after 24h for coating with Ag/N = 1/4. 0.05 mg/L after 4h and 0.04 mg/L after 24h for coating with Ag/N = 1/8; no data for coatings with lower silver content	https://doi.org/10.1002/mame.200800269				5
titanium discs (40 mm diameter, 2 mm thickness) coated with Ag2O (0.3% wt) and hydroxyapatite (99.7% wt) mixture	test 1) coated discs placed in 100 mL of FBS in a glass beaker at 37 C, 1 mL aliquots taken at 0, 1, 4, 12, 24, 72 and 168 h; test 2) coated disc immersed in 4.2 mL of FBS at 37 C for 24h, after which the disc was washed with distileld water and immersed in fresh FBS - 6 successive immersions in total, 24h each	uncontrolled ion release	Ag ions; test 1) concentration - 78 ppb (microg/L) after 1h incubation, 127 ppb after 4h, 197 ppb after 12h, 260 ppb after 24h, 333 ppb after 72h, 373 ppb after 168h in 100 mL FBS; test 2) Ag concentration = 6467 ppb in FBS after first immersion, 2167 ppb after second, 1433 ppb after third, 987 ppb after fourth, 1177 ppb after fifth, 583 ppb after sixth. Total amount of released Ag ions after 24h…	https://doi.org/10.1002/jbm.b.31235				6
AgNO3-doped (55 mg/0.3 mmol) perfluoropolyether-urethane coated glass substrates (25 cm2), coat thickness approx. 30 micrometers	50 mL of PBS, pH = 7.4, 37 °C for 1h, followed by six successive 24 h immersion periods (total 144h), each time in fresh PBS	uncontrolled ion release	Ag ions; 300 ppb released after 1h, additional ~100 ppb released after each 24h incubation step	https://doi.org/10.1016/j.colsurfb.2009.03.014				7
polydimethylsiloxane (silicone) discs (10 mm diameter) coated with 0.8–0.9 μg/cm2 Ag	subcutaneous implants in rats, on the back; discs were explanted after 21 days	uncontrolled ion release	no significant difference in total Ag content on discs before and after implantation (0.8–0.9 μg/cm2 Ag on discs after 21 days)	https://doi.org/10.1002/jbm.b.31492				8
glass slides coated with n-heptylamine plasma polymer (HApp) films loaded with Ag nanoparticles (500 ng/cm2), ∼200 nm coat thickness; additional overlays of 6, 12 and 18 nm thick HApp to control Ag ion release	immersion in PBS for up to 20 days (at RT? pH = 7.4? Info n/a)	uncontrolled ion release	Ag ions; Remaining silver in coating measured at 1, 2, 5, 7, 14 and 20 days from plasmon resonance peaks. Silver release data estimated from graph (no numbers provided). Cumulative silver release: no overlay - 30% (d1), 46% (d2), 50% (d5), 57% (d7), 68% (d14) 70% (d20); 6nm - 29% (d1), 40% (d2), 46% (d5), 50% (d7), 53% (d14) 58% (d20); 12nm - 5% (d1), 14% (d2), 25% (d5), 28% (d7), 31% (d14) 35% (…	10.1021/nl903274q (SCOPUS link, journal re-directs proper DOI article and full article links to starting page)				9
glass slides coated with Ag nanoparticles embedded in copolymer of butyl acrylate (BuA) and methyl methacrylate (MMA) with poly(acrylic acid) (PAA) blocks to coordinate NPs	deionized water (pH- and temperature-controlled, but values not given)	uncontrolled ion release	Ag ions; 8.5 × 10−8 M/cm2released after 1 day, 1.6 × 10−7 M/cm2(0.16 µM/cm2) after 6 day immersion (cumulative release, medium was not changed)	https://doi.org/10.1007/s00396-009-2178-x				10
steel coated with 1 wt% Ag/SiO2 core–shell nanoparticles in acrylic resin varnish	fresh seawater (no additional characterization given)	uncontrolled ion release	Ag ions; concentration in water samples - 0.02 ppm, 0.04 ppm and 0.04 ppm after 7, 14 and 21 days of immersion (cumulative?)	https://doi.org/10.1016/j.matchemphys.2009.11.020				11
Tissue culture polystyrene Petri dishes coated with plasma polymer created from ethylene (C2H4) and CO2with incorporated Ag nanoparticles. Various combinations tested: coating thickness 25 or 100 nm, CO2/C2H4= 2:1, 4:1 and 6:1, power input 50 and 100 W. Coatings: 1) pure Ag (no CO2/C2H4, power 100W) 2)25nm/2:1/50W 3)25nm/4:1/50W 4)25nm/6:1/50W 5)25nm/6:1/100W 6)100nm/2:1/50W 7)100nm/4:1/50W 8)100…	4 ml deionized water, incubated for 1 h, 1, 4, 6, and 14 d (RT?)	uncontrolled ion release	Ag ions; Cumulative release after 1 day in µgcm−2: 1) 5.3 2) 0.4 3) 0.8 4) 0.8 5) 2.1 6) 0.4 7) 0.8 8) 1.6 9) 4.5; after 14 days in µgcm−2: 1) 7.4 2) 0.4, 3) 0.8, 4) 1.3 5) 3.2 6) 0.4 7) 0.8 8) 2.5 9) 8.3 Ag released/Ag content: after 1 day - 2) 40% 3) 50% 4) 30% 5) 30% 6) 55% 7) 40% 8) 20% 9) 15%. after 14 days - 2) 55% 3) 70% 4) 55% 5) 50% 6) 55% 7) 40% 8) 40% 9) 35%	https://doi.org/10.1002/ppap.200900163				12
Textile fabric coated with silica sol consisting of tetraethoxysilane (TEOS) and 3-glycidyloxypropyltriethoxysilane (GLYEO) in 7:3 ratio with 0.25 wt% of Ag in the form of AgNO3; thermal treatment after coating at 80, 120 and 180°C for 1 h	5 × 7.5 cm of a plain textile sol-coated thermal-treated fabric were stirred in 200 mL of distilled H2Oat 40 °C	uncontrolled ion release	Ag ions, release data estimated from graphs. Release after 1h: 80 C - 720 mg/m2, 120 C - 620 mg/m2, 180 C - 20 mg/m2; release after 24h - 80 C - 900 mg/m2, 120 C - 800 mg/m2, 180 C- 100 mg/m2. (100 mg/m2 = approx. 2% of total silver content)	https://doi.org/10.1007/s10971-010-2245-2				13
Ag nanoparticles on self-assembled mercaptosilane monolayer-coated glass; 2.1 × 2.6 cm glass slides coated on both sides (10.92 cm2 coated surface), 4.64 μg total silver in coating	3 mL of bidistilled water at RT	uncontrolled ion release	Ag ions; 0.69 μg of total 4.64 μg released (15%) over 19 days; approx. 0.6 μg released during first 24 h	https://doi.org/10.1016/j.jcis.2010.06.019				14
Bisphenol A glycidylmethacrylate (BisGMA)/triethyleneglycol dimethacrylate (TEGDMA) surface coated with lactose-modified chitosan containing Ag nanoparticles	coated sample rinsed in 1 mL of deionized water for 1 h with constant stirring (no info on temp.)	uncontrolled ion release	Ag ions; concentration below ICP-AES detection limit (<0.01 ppm)	https://doi.org/10.1016/j.actbio.2010.07.024				15
Double lumen polyurethane ‘‘Carbothane’’ catheters (Silvertech Ltd) 30 cm long and with an outer diameter of 4 mm coated with Ag nanoparticles (0.54% wt Ag content)	thermal bath set to 37° C in which deionized water flows in and out the catheter pushed by a pump with a capacity of 5 L/min	uncontrolled ion release	Ag ions; Ag content reduced from 0.54% wt to 0.41% wt afteer 30 days of washing	https://doi.org/10.1007/s10856-011-4380-x				16
Microscopic glass slides coated with tetraethoxysilane (TEOS)-methyl-triethoxysilane (MTES)-SiO2 sol containing AgNO3 (3% mol Ag with respect to the silica coating)	immersion in deionized water at 30 °C (immersed surface/water ratio of 0.4 cm2/ml) for 48 days (lixiviation test)	uncontrolled ion release	Ag ions; 5% of total silver coating released after 5 days, 11% released after 48 days	https://doi.org/10.1016/j.surfcoat.2011.06.018				17
Ti–6Al–7Nb biomedical alloy disks (22 mm diameter, 8 mm height) with porous TiO2 coatings containing Ag nanoparticles. Two different Ag coatings - 0.3 (27.53 ± 0.82) and 3.0 (213.9 ± 3.13) μg total Ag; only Ag in contact with solution was available for release and antimicrobial activity - total of 20.82 ± 0.88 (0.3) and 127.75 ± 5.28 μg (3.0) Ag available	30 ml of double distilled water kept at 37 °C under gentle stirring conditions up to 7 days; water replaced at days 1, 2, 5 and 7	uncontrolled ion release	Ag ions; Cumulative Ag release, μg ml−1:0.3 coating - 0.0077 ± 0.0022 (2 days) 0.0096 ± 0.0027 (5 days) 0.0120 ± 0.0032 (7 days); 3.0 coating - 0.0492 ± 0.0129 (2 days), 0.0633 ± 0.0132 (5 days), 0.0894 ± 0.0154 (7 days). Release in μg: 0.3 coating - 0.231/1.1% (2 days), 0.288/1.3% (5 days), 0.36/1.7% (7 days); 3.0 coating - 1.476/1.1% (2 days), 1.899/1.5% (5 days), 2.682/2% (7 days)	https://doi.org/10.1016/j.actbio.2012.07.005				18
Microscopy cover glass slides coated with polyethilenimine-silane self-assembled monolayers containing Ag nanoparticles	samples dipped in ultrapure water and shaken for 14 days	uncontrolled ion release	Ag ions; 4.9% of total grafted silver is released in 5 h, 7.2% in 24 h, 8.2% of Ag released in 14 days (0.062 μg cm−2 released after 14 days)	https://doi.org/10.1039/C1DT11373A				19
soda-lime glass-Ag nanoparticle (20 wt%) coating on aluminum and zirconia ceramic substrates	Petri dishes covered with Soft Nutrient Agar, incubation at 30°C for 24 hours	uncontrolled ion release	Ag ions; ~1 mg/cm2 silver released (biocidal against E.coli)	https://doi.org/10.1371/journal.pone.0033135				20
Titanium oxide coating containing Ag nanoparticles on Ti-6Al-4V alloy rods (4.5 mm diameter × 30 mm length)	10 ml of PBS at 37 °C for 15 days	uncontrolled ion release	Ag ions; release rate 1.2 ppb.mm−2(1.2 ng/g coating*mm-2) after 12 hours, 0.4 ppb.mm−2(0.4 ng/g coating*mm-2)after 24 hours - equilibrium value, maintained for 15 days	https://doi.org/10.1016/j.surfcoat.2012.02.015				21
5 cm x 5 cm glass slides coated with methyltriethoxysilane (MTEOS) sol–gel containing 1% Ag (w/w of coating), most likely in nanoparticle form (d<50 nm)	5 mL of sterile deionized water at 37°C replaced afer 1, 4, 8, 12, 16, 20 and 24 h	uncontrolled ion release	Ag ions; release rate: 1h - 50 ppm/m2, 4h - 33 ppm/m2, 8h - 30 ppm/m2, 12h - 15 ppm/m2, 16h - 15 ppm/m2, 20h - 10 ppm/m2, 24h - 5 ppm/m2 (estimated from graph)	https://doi.org/10.1016/j.colsurfb.2012.01.035				22
Ag nanocluster/silica composite coating on Combitherm®TC XX polymer (Wipak Walsrode GmbH)	Abrasion test - 50,000 cycles with Kevlar as abrasive counterpart material	mechanical wear of coating	100–500 cycles - coating removed at the edge of the sample; 500-3000 cycles - deposited layer was partially removed, surface appeared with dark and light spot; 3000-5000 cycles - coating completely removed from the polymeric substrate	https://doi.org/10.1016/j.matchemphys.2012.05.049				23
Cover glass coated with silicon oxide matrix (SiOx) containing Ag nanoparticles (5% Ag content)	Washability test - nylon brushes and a holder of stainless steel, and distilled water were used on a washability tester (Simex, Haan, Germany). Number of washing cycles - 10-10 000. Ag ion release tested after a set number of washing cycles: around 12 ml of double distilled water was brought in contact with around 20 cm2 surface area of the SiOx–Ag‐coated glass samples for an optimized period of …	uncontrolled ion release measured after mechanical wear cycles	Ag ions; Silver release given in mg/L (concentration in distilled water after an optimized amount of time). Unwashed coating - 8 mg/L; 10 wash cycles - 2.4 mg/L; 100 wash cycles - 2.2 mg/L; 1000 wash cycles - 2.0 mg/L; 10 000 wash cycles - 1.7 mg/L.	https://doi.org/10.1002/ppap.201200059				24
1 cm2 quartz substrate coated with TiO2 matrix containing Ag nanoparticles. Ag metal volume fraction - 6%, 10.5%, 20% and 32%	10 mL of ultrapure water, Ag concentration measured after 40 min, 2 h, 1 day and 3 days	uncontrolled ion release	Ag ions; cumulative Ag release in μg/cm2 - 6%: 0.01 (40'), 0.02 (2h), 0.05 (1d), 0.06 (3d); 10.5%: 0.07 (40'), 0.11 (2h), 0.24 (1d), 0.31 (3d); 20%: 0.16 (40'), 0.61 (2h), 0.84 (1d), 0.66 (3d); 32%: 0.63 (40'), 1.35 (2h), 2.37 (1d), 3.51 (3d)	https://doi.org/10.1016/j.msec.2013.01.069				25
316LVM stainless steel intramedullary nails coated with titanium oxide and siloxane polymer doped with Ag neodecanoate	tibial fracture fixed with coated nails (Ag content in coating not stated) for 5 weeks	uncontrolled ion release	Ag ions; not all coated silver released after 5 weeks of implantation (no quantification given). Silver level in liver 0.045 ppm, which was lower than the method reporting limit (0.099 ppm). No silver was detected from other organs of the treated goat. No silver or titanium was detected in any goat serum samples	https://dx.doi.org/10.1155/2013/674378				26
Titanium rods (length, 20 mm; diam, 1 mm) coated with Ag2O‐containing hydroxyapatite (0.21 wt% Ag2O) implanted into medullary cavity of rat tibiae	Serum levels of Ag were calculated for rats euthanized at 24, 48, 72 h and 4 weeks	uncontrolled ion release	Ag ions; mean concentration of Ag in serum was 1.6 ± 0.8 ppb at 24 h, 3.3 ± 1.6 ppb at 48 h, 2.5 ± 1.3 ppb at 72 h, and 0.4 ± 0.1 ppb at 4 weeks. No significant difference was identified between 24, 48, and 72 h. Mean concentration of Ag at 4 weeks was significantly lower than at 48 or 72 h. Serum Ag ion concentrations peak at about 48 h	https://doi.org/10.1002/jor.22357				27
Glass substrates (1 × 1 cm2) coated with Ag nanoparticles immobilized on amine-functionalized silica; 35.6% wt of the antimicrobial surface occupied with elemental silver	Incubation in deionized water for 60 min. Coated samples were re-used by removing them from aqueous medium, drying them in N2 atmosphere, and reintroducing them to fresh deionized water	uncontrolled ion release	Ag ions; total concentration of silver released after 60 minutes was: 2nd use - 16 ± 1.3, 4th use - 20 ± 0.9, 6th use - 25.1 ± 0.78, 8th use - 19.2 ± 0.04, and 10th use - 11 ± 1.1 ppb. Reduction in AgNP surface coverage - 15.8% (1st use) to 13.3% (11th use)	https://doi.org/10.1039/C3NR00024A				28
Poly(glycolic acid)-based surgical sutures (0.3 mm diameter) coated with amphiphilic hyperbranched core-shell poly-L-lysine containing Ag nanoparticles; polymer modified with fatty acid chlorids (FA) or glycidyl hexadecyl ether (GHE) to obtain core-shell amphiphilic macromolecules. 3 surface Ag concentrations obtained for each PLL modification: 22.49 (G1), 14.58 (G2) and 9.02 (G3) mg/cm2 for GHE …	Coated suture (2 m) was coiled and placed in a tube with 15 mL of PBS (pH=7.4). The tube was shaken with 75 rpm at 37 °C. After 24 h, the sample was placed in a new tube with 15 mL of PBS. This procedure was repeated every 24 h for a period of 30 days. The washing solutions from day 1, 3, 5, 10, 15, 20, 25, and 30 were analyzed for Ag content	uncontrolled ion release	Ag ions; release very similar for all 6 coatings for first 10 days - 0.3–0.4 μg/cm2 a day. G1 and F1 maintain the same release for 30 days, other coatings reduce their release rate: G2/F2 - 0.2 μg/cm2 at day, G3/F3 - 0.1 μg/cm2 at day 30. Total Ag release after 30 days (as % of initial content): G1 - 52%, G2 - 61%, G3 - 72%; F1 - 57%, F2 - 71%, F3 - 86%	https://doi.org/10.1080/09205063.2013.782803				29
Quartz slides coated with Polyelectrolyte multilayer (PEM) containing 8 bilayers of Poly (allylamine hydrochloride) (PAH) and dextrane sulfate (DS), with embedded Ag nanoparticles and moxifloxacin hydrochloride (MH). Average total MH load - 300–600 μg/cm2.	3 ml of PBS buffer in a tightly capped plastic vial maintained at 37 °C in an incubator shaker. 2 mL removed and replaced with fresh PBS at designated timepoints. Laser exposure - 530 nm, 10 Hz series of 7 ns pulses from neodymium:yttrium–aluminum–garnet (Nd:YAG) laser, periodic 15 s exposure	Passive and laser-activated drug release	Moxifloxacin hydrochloride; Total amount of MH release after 7h - 63% (passive) 85% (laser-activated).	https://doi.org/10.1016/j.ijpharm.2013.09.036
Biomedical NiTi alloy plates (10 mm × 10 mm × 2 mm) coated with Ag or Chitosan/Ag complex (2.1% Ag atomic concentration)	25 mL of deionized water at 37 °C, samples incubated for 5 days	uncontrolled ion release	Ag ions; cumulative release: Ag coating - 0.01 μg/mL after 5 days; Ag/chitosan coating - 1 μg/mL after 24 h, unchanged concentration after 5 days	https://doi.org/10.1016/j.surfcoat.2013.05.037				30
13 mm Thermanox cover slips substrates (polyester) coated with Allylamine plasma polymer containing Mercaptosuccinic acid (MSA)-modified Ag nanoparticles	coated samples were immersed in Milli-Q water for time intervals of 1, 3, 7 and 30 days	uncontrolled ion release	Ag ions; percentage of total Ag content released: 1 day -~50%, 3 days -~50%, 7 days -~70%, 30 days -~80% (data estimated from graphs, no numbers given)	https://doi.org/10.1016/j.biomaterials.2014.02.033				31
Ag-doped diamondlike carbon (Ag-DLC) coatings on 100-oriented single crystal silicon (Si) substrates cut into 10 × 10 mm squares; Ag content - 1.7%	Coated samples (10 × 10 mm) were immersed in 3 ml deionized millipore water and kept at room temperature for a period varying between 30 min and two weeks.	uncontrolled ion release	Ag ions; cumulative release - below limit of detection for the first 10 h, ~0.1 mg/L after 100 h, ~1.3mg/L after 2 weeks, plateau not reached (data estimated from graphs)	https://doi.org/10.1116/1.4871435				32
Three different textiles; (i) a white Nylon fabric PIA-44378D,Type I (nylon) (ii) a black textile with active carbon (black) (iii) a camouflage Suit Tissue “Defender M" (camouflage), coated with Ag nanoparticle/silica composite coating	1) Cumulative release: Coated samples (approx. 1 cm × 1 cm) were immersed in artificial sweat (NaCl (5.0 g NaCl/L, 1.0 g urea/L, and 1.0 g lactic acid/L) and synthetic tap water (0.099 g CaCO3/L, 0.033 g NaCl/L, and 0.0298 g Na2SO4/L) with an area/solution volume ratio of 1 cm2/10 mL for 2, 4, 24 and 168 h at dark conditions at 37 °C and pH 6.5 (artificial sweat), or pH 7.5 (synthetic tap water).…	uncontrolled ion release	Ag ions; 1) cumulative: Camouflage/sweat - 80% Ag remaining after 1 week, camouflage/tap - ~100% remaininga fter 1 week. Nylon - ~95% remaining after 1 week in both sweat and tap water. 2) non-cumulative: Camouflage coated in art. sweat - Ag content reduced from less than 6 μg/cm2to less than 1 μg/cm2after 30 days in artificial sweat (~10% Ag remaining). Nylon in tap water - Ag content reduced fr…	https://doi.org/10.1016/j.apsusc.2014.07.196				33
Mussel adhesive proteins (MAP)-Ag4-Ag nanoparticle coated polystyrene surface (9 mm diameter). Ag4 - silver-binding peptide	Successive 24h immersion in 500 μL PBS (HyClone) for 7 days in dark	uncontrolled ion release	Ag ions; Total cumulative release after 7 days - 0.55 ± 0.02 ppm. Cumulative release by days: d1 - 0.2 ppm, d2 - 0.3 ppm, d3 - 0.35 ppm, d4 - 0.4 ppm, d5 - 0.45 ppm, d6 - 0.5 ppm. Release rate by days: d1 - 0.21 ppm, d2 - 0.11 ppm, d3->d7 -~0.05 ppm	https://doi.org/10.1021/am505784k				34
Polypropylene‐made surgical mesh coated with multilayer plasma polymer systems which consisted of two layers of maleic anhydride plasma polymer, with Ag nanoparticles trapped between the layers	9 mL od distilled water for 24h. Elongation of the coated meshes was performed on a homemade stretching device with a speed of 24 µm · s−1. Samples were subjected to stretching/unstretching cycles where the elongation rates were set to 20, 40, or 80% of the initial sample length (100% of elongation means twice the initial length).	uncontrolled ion release; release rate regulated by material porosity as a result of material stretching	Ag ions; no stretching - Ag ions detected in solution within 24h. Concentration of ions increased ~2x in 60% stretched samples in the same timeframe (measured by absorbance and reported in arbitrary units). No quantification of release given.	https://doi.org/10.1002/ppap.201300091				35
Ag ions–intelligent pyridinate vancomycin (IPV) conjugate‐coated gold surface. 2 coatings: Ag-IPV and Ag-IPV-Ag	samples immersed in PBS at RT for 30 days	uncontrolled ion and drug release	Ag ions, IPV; cumulative Ag release: Ag-IPV-Ag coating - After 6 h, approximately 1 ppm (μg mL−1) was released into the PBS solution, followed by a plateau reached at day 4 with 2.29 μg mL−1of silver ions. Ag-IPV coating - only released silver ions for 2 h, and only a low concentration (0.25 μg mL−1) could be measured after seven days. Cumulative IPV release: Ag-IPV-Ag - 40 % of IPV was released …	https://doi.org/10.1002/cmdc.201400072				36
Glass discs functionalized with alkynyl (GDA) terminated monolayers with attached Ag ions	Samples immersed in 0.3 mL of 20 mM PBS (pH 7.4) at 37 °C and 150 rpm for up to two weeks. Samples were collected from the incubation medium after 6, 12, 24, 120, and 360 h	uncontrolled ion release	Ag ions; cumulative release - 40.05 ppb (24h), 60 ppb (5 days) and 120 ppb (15 days)	https://dx.doi.org/10.5012/bkcs.2014.35.1.39				37
Medical grade titanium test discs coated with silane polymer and Ag nanoparticle monolayers; additional alternate silane and AgNP layers deposited on top. Coatings with one (Ag-1, 6.94 ± 1.64 µg Ag), five (Ag-5, 26.32µg Ag), 10 (Ag-10, 58.48 ± 0.53µg Ag) and 15 (Ag-15, 8.99 ± 3.10 µg Ag) AgNP layers were tested	5 mL of Dulbecco’s PBS or FBS at RT for up to 15 days. Timepoints - 1, 5, 8, 12, and 15 days	uncontrolled ion release	Ag ions; Release by days in μg: Ag-1/PBS - 0.2 (d1), 0.1 (d5->d15), Ag-1/FBS - 0.29 (d1), 0.62 (d5), 0.28 (d8), 0.15 (d12), 0.1 (d15), Ag-5/PBS - 0.2 (d1), 0.39 (d5), 0.1 (d8->d15), Ag-5/FBS - 0.47 (d1), 0.6 (d5), 0.82 (d8), 0.8 (d12), 0.35 (d15). Amount of Ag (μg) in FBS at d5: Ag-1 - 0.63, Ag-5 - 0.62, Ag-10 - 0.97, Ag-15 - 1.48	https://doi.org/10.1177/0885328213491793				38
Petri dishes (d=20cm) coated with polydopamine-immobilized Ag nanoparticles (PDA - reducing agent)	111 mL of seawater medium on an orbital shaker (70 rpm) at RT. 2 mL of media collected at each timepoint and replenished with fresh medium	uncontrolled ion release	Ag ions; cumulative release (µg/mL) - 7.5 (12h), 15.5 (24h), 22.5 (36h), 25.7 (60h) - plateau maintained until the last timepoint (5 days). Ag+ release led to a 5.5% decrease in surface silver content after 4 months (separate experiment).	https://doi.org/10.1021/am500292y				39
Petri dish with an adhesive Teflon layer coated with nanocomposite films containing Ag nanoparticles (NCF-I (20 wt % of AgNP, 6% Ag content) or NCF-II (40 wt % of AgNP, 12% Ag content)), prepared by mixing acrylic latex with pre-synthesized AgNPs stabilized by polyacrylamide with thiol end groups. NCFs were cured in an oven at 150 °C for 5 h	1 × 1 cm2 films immersed in 10 mL of distilled water for 24 h	uncontrolled ion release	Ag ions; total Ag release after 24h: NCF‐I - 84.50%, NCF‐I cured - 7.75%, NCF‐II - 76.00%, NCF‐II cured - 9.92%	https://doi.org/10.1002/pola.27130				40
Titanium (10×10×1 mm) coated with nanostructured TiO2 films (nanorod, nanotip, and nanowire) containing Ag nanoparticles. Ag content - nanorod 1.9%, nanotip - 2.7%, nanowire 3.0% (XPS analysis)	Coated samples were immersed in 10 mL fresh water at 37°C for 1 day, 3 days, and 7 days	uncontrolled ion release	Ag ions; cumulative released Ag concentration: nanowire - 0.65 µg/mL (day 1), 0.69 µg/mL (day 7), nanotip - 0.16 µg/mL (day 1), 0.2 µg/mL (day 7), nanorod - no release detected. Residual Ag content: nanowire - 1.0% (decrease from 3.0%), nanotip - 1.2% (decrease from 2.7%), and nanorod - 1.8% (decrease from 1.9%, Ag not detected in immersion medium)	https://doi.org/10.2147/IJN.S63807				41
Polyurethane coated with two polyparaxylylene layers with elemental Ag trapped in between. Three different coatings tested - no cap layer (1), PPX 190 nm cap thickness (2) and PPX 540 nm cap thickness (3)	25 ml of artificial urine at 37 °C in petri plates on laboratory shaker. 1 mL was taken on 0, 10, 20, 40, 80, 120, 180 min and 18h timepoints and replaced with fresh medium	uncontrolled ion release	Ag ions; release rate after 20 min: coating 1) and 3) 50 pg cm-2 min-1 - plateau, release rate maintained for 3h, coating 2) 2000 pg cm-2 min-1, after 3h - above 650 pg cm-2 min-1; projected release rate after 24h - 340 pg cm-2 min-1.	https://doi.org/10.1116/1.4876736				42
Hydroxyapatite coated with diblock copolymer composed of bisphosphonate and pyridine oligomers containing Ag nanoparticles	0.1 g of coating mix was soaked in deionized water for 2 weeks at room temperature	uncontrolled ion release	Ag ions; 0.3 ppm detected	https://doi.org/10.1021/ma501997x				43
Titanium plates (d=14mm) coated with TiO2 containing elemental Ag. Three different coatings were tested - M1 (0.95 wt% Ag), M2 (1.36 wt% Ag) and M3 (1.93 wt% Ag)	Coated samples were immersed in 20 ml PBS and kept at 37 °C for 7 days. The liquid was collected at days 1, 2, 4 and 7 and replaced with fresh PBS	uncontrolled ion release	Ag ions; concentration detected in PBS: M1 coating - 482 ppb (d1), 310 ppb (d2), 150 ppb (d4), 100 ppb (d7); M2 - 631 ppb (d1), 540 ppb (d2), 210 ppb (d4), 120 ppb (d7); M3 - 679 ppb (d1), 600 ppb (d2), 410 ppb (d4), 320 ppb (d7)	https://doi.org/10.1016/j.msec.2014.07.002				44
Titanium plates coated with TiCaPCON-Ag nanoparticles; three coatings - 0.4, 1.2 and 4.0% of Ag	Coated samples were immersed in flasks filled with 40 ml of a normal saline at room temperature. To analyze Ag concentration, 1 ml of the solution was collected after 1, 3, 5, and 7 days	uncontrolled ion release	Ag ions; cumulative release -> 0.4% and 1.2% - 25 ppb (24h), slow release (1.5–3 ppb/day) for the remaining 6 days, total release ~30 ppb for 0.4% and ~35 ppb for 1.2%. Cum. Release for 4.0% - ~75 ppb (24h), 170 ppb (3d), 190 ppb (5d), 220 ppb(7d).	https://doi.org/10.1016/j.apsusc.2014.12.119				45
Petri dishes coated with Poly(methyl methacrylate‐b‐n‐butyl acrylate‐b‐dimethylsiloxane‐b‐poly‐n‐butylacrylate‐b‐methyl methacrylate) pentablock copolymer containing Au and Ag nanoparticles (containing 0.5–1 mg of Ag)	Copolymer/Ag and copolymer/Au–Ag NC films (0.5 g each) were submerged separately in water (5 mL) and water–methanol (1:1 v/v) mixture, kept at 35°C for 10 and 45 days.	uncontrolled ion release	Ag ions; <0.06 mg/L (below limit of detection), unspecified if the results was obtained for both tested media and both timepoints	https://doi.org/10.1002/pc.23121				46
Glass substrate (2 × 2.3 cm2) coated with Ag nanoparticles immobilized on ZnO nanorods by arginine (Ag content 59.0 ± 5 μg, 12.83 μg cm−2; Zn content 1016 ± 91 μg)	Coated samples were immersed in deionized water for up to 90 minutes. The same samples were used 11 times alternately, such that each nthand n + 1thstudy denotes a disinfection study and a silver/zinc release study, respectively	uncontrolled ion release	Ag and Zn ions; Ag release after 90 minutes duration for the 2nd, 4th, 6th, 8th, and 10thuse was 103.8 ± 4.6, 94.7 ± 2.5, 65.2 ± 2.8, 44.7 ± 2.5, and 40 ± 1.1 ppb, respectively. Zn release after 90 minutes was progressively reduced from 91.6 ± 2.4 ppb in the 2nd use to 18.5 ± 0.2 ppb after the 8th reuse (as low as ∼26 ppb (11th use, 30 min) of silver release was sufficient to elicit 100% killing …	https://doi.org/10.1039/C4NR06913G				47
Titanium alloy substrate coated with alumina/nanosilver (Al2O3/Ag nanoparticles). 5 coatings with different Ag content in ppm: A1 (0.27), A2 (3.18), A3 (13.78), A4 (145.96), A5 (4963.68)	Al2O3/Ag coatings were immersed in 100 ml deionized water at 37 °C for 2, 5, 10, 15, 20, 25, 30 days	uncontrolled ion release	Ag ions; Cumulative release in μg/cm2 A2: 0.2 (d1), 0.3 (d2), 0.5 (d5), 0.6 (d10->30). A3: 0.2 (d1), 0.4 (d2), 0.75 (d5), 0.8 (d10), 1.3 (d15), 1.6 (d20->30). A4: 0.3 (d1), 0.6 (d2), 0.8 (d5), 1.4 (d10), 1.8 (d15), 2.3 (d20), 2.2 (d25), 2.5 (d30). A5: 0.4 (d1), 0.75 (d2), 1.3 (d5), 2.1 (d10), 2.7 (d15), 3.3(d20), 3.8 (d25), 4.0 (d30)	https://doi.org/10.1039/C5RA01329A				48
stainless steel coated with titania-nanosilver (TiO2/Ag nanoparticle). 4 coatings tested for release with different AgNP concentrations in ppm: T2 (10), T3 (100, T4 (1000), T5 (10 000)	TiO2/Ag coatings were immersed in 100 ml deionized water at 37 °C for 2, 5, 10, 15, 20, 25, 30 days	uncontrolled ion release	Ag ions; Cumulative release in μg/cm2 - T2: 0.25 (d2), 0.45 (d5), 0.55 (d10->d30). T3: 0.4 (d2), 0.6 (d5), 1.1 (d10), 1.3 (d15), 1.5 (d20->d30). T4: 0.6 (d2), 1.0 (d5), 1.5 (d10), 2.0 (d15), 2.2 (d20), 2.4 (d25->d30). T5: 0.75 (d2), 1.25 (d5), 2.0 (d10), 2.6 (d15), 2.9 (d20), 3.3 (d25), 3.4 (d30)	https://doi.org/10.1016/j.apsusc.2015.07.147				49
titanium discs (d=10mm) coated with Ag nanoparticles, polyarginine and hyaluronic acid layers with embedded catestatin (discs immersed in 100 × 10−6M catestatin solution)	37 °C in NaCl‐Tris buffer for 40 h	uncontrolled peptide release	Catestatin; After 40 h, the amount of peptide released corresponds to a concentration of about 25 μg mL−1. Release still in linear phase, plateau has not been reached	https://doi.org/10.1002/adhm.201500546
glass coated with periodically ordered mesoporous organosilica nanoparticles containing Ag nanoparticles. Organosilica nanoparticles were functionalized with thiol groups or sulfonic acid: SH100 - all available sites modified with thiol groups; SH50 - 50% of sites modified; SO3H100 - all sites modified with sulfonic acid. S:Ag ratio (1:0.8) -> almost all thiol groups coordinate Ag (no info on Ag …	The leaching of Ag+from the loaded materials was monitored using a silver ion selective electrode (AgISE) measurement, no other info given	uncontrolled ion release	Ag ions; cumulative release through 9 days (plateau reached after 1 day): 0.007 mg/Lm2 (SH100), 0.08 mg/Lm2 (SH50), 0.7 mg/Lm2 (SO3)	https://doi.org/10.1021/am5083057				50
100% silicone Foley catheters [Bardex®, 14 Ch/Fr (OD 4.7 mm)] coated with polydopamine (PDA) with embedded Ag nanoparticles and Poly(sulfobetaine methacrylate‐co‐acrylamide) (PSBMA) outer layer. Three different coatings tested: P1 (PDA‐AgNP‐PDA) - silver content 13 μg cm−2, P2 (PDA‐AgNP‐PDA‐PSBMA) - silver cnt 12.5 μg cm−2, and P3 (PDA‐(AgNP‐PDA)2‐PSBMA) - silver cnt 22 μg cm−2. Control - Dover™ …	1) 1 cm catheter segment immersed in 2 mL of sterilized artificial urine in a 15 mL centrifuge tube, which was then incubated in a 37°C water bath with shaking at 100 rpm. After every 24 h, the segments were taken out and immersed in a fresh artificial urine solution. Release test was performed for 7 days. 2) P3 in art. urine with P.mirabilis (10^5cells/mL) for 48 days (same conditions)	uncontrolled ion release	Ag ions; cumulative release after 7 days in sterile art. urine (μg cm−2) - P1: 0.15 (d1), 0.3 (d2), 0.45 (d3), 0.6 (d4), 0.75 (d5), 0.85 (d6), 1.0 (d7). P2: 0.15 (d1), 0.3 (d2), 0.5 (d3), 0.65 (d4), 0.8 (d5), 1.0 (d6), 1.15 (d7). P3: 0.2 (d1), 0.4 (d2), 0.6 (d3), 0.75 (d4), 0.95 (d5), 1.15 (d6), 1.3 (d7). Dover: 0.25 (d1), 0.5 (d2), 0.75 (d3), 0.8 (d4), 1.0 (d5), 1.15 (d6), 1.3 (d7). Cum. release…	https://doi.org/10.1002/jbm.b.33230				51
Stainless steel gauze (V2A: DIN ISO 1.4301), 50 μm mesh coated with AgXX containing elemental Ag and ruthenium	12 weeks exposure of AgXX® in distilled water	uncontrolled ion release	Ag ions; 0.1–0.2 mg l− 1Ag was measured after 12 weeks exposure of AgXX® in distilled water	https://doi.org/10.1016/j.msec.2015.01.080				52
superabsorbent fibers “Oasis Type 102/52/10” based on crosslinking copolymers of acrylic acid coated with Ag nanoparticles (Ag content 1.37 wt.%)	glass vials with deionized water (30 g) at 37 °C. At 2, 4, 24, 72, and 168 h aliquots were extracted	uncontrolled ion release	Ag ions; cumulative release in ppm [μg/ml] - 3.6 (2h), 4 (4h), 5.6 (24h), 6.0 (72->168h)	https://doi.org/10.1016/j.msec.2015.05.050				53
poly(allylamine hydrochloride)-modified mica sheets with deposited Ag nanoparticle monolayer. Three coatings with different nanoparticles sizes - S1 (15 nm), S2 (28 nm), S3 (54 nm)	Silver monolayers immersed in the electrolyte solutions of controlled pH (3.5, 5.5, 7.4, and 9.0) and ionic strength of 0.01 M at 25°C up to 167h	uncontrolled nanoparticle release	Ag nanoparticles; the desorption rate is the fastest for the lowest pH (3.5). For pH 3.5, the residue coverage of the monolayers after 167 h is 80 % of the initial value for nanoparticles S3 (54 nm), whereas for the sampleS1 (15 nm) the coverage for the same time of desorption decreases to 50 %. S2 - remaining coverage ~80%	https://doi.org/10.1007/s11051-015-3035-0				54
glass microscopic slides (9x25mm) coated with amine‐modified xerogels containing N‐diazeniumdiolate underlayer and AgNO3‐loaded sol. Ag content in gels (mol%): 1 (AG-1), 2.5 (AG-2.5), and 5 (AG-5). AG-1 synthesized with alkyl‐functionalized silane barrier layers between N-diaz. and AgNO3: 0, 20, 40 or 60 μL.	1) Ag release - 10 mL PBS (37°C) for 4 days 2) NO release - 30 mL deoxygenated PBS (37°C) for 60 h	uncontrolled ion release	Ag ions, NO; cumulative Ag release - AG-1 with barriers: 0 μL - 10 ppb (24->96h), 20 μL - 60 ppb (24h), 75 ppb (96h), 40 μL - 140 ppb (24h), 150 ppb (96h), 60 μL - 175 ppb (24h), 18 ppb (96h), without amine underlayer - 260 ppb (24->96h). Cumulative release for different mol% with 40 μL barriers: AG-1 - 140-150 ppb( 24->96h), AG-2.5 - 750 ppb (24h), 800 ppb (96h), AG-5 - 1150 ppb (24h), 1700 (96h…	https://doi.org/10.1002/jbm.a.35331				55
glass slides (10x10mm) coated with poly(N-isopropylacrylamide)(PNIPA) and poly(methyl methacrylate) (PMMA) with Ag nanoparticles. Three coatings with different PMMA/PNIPA ratios: 1:1, 2:1, 5:1. Ag content not specified	samples immersed in distilled water at 25 °C for 72h	uncontrolled ion release	Ag ions; cumulative release in mg/L -> 1:1 - 22 (12h), 24 (24h), 27 (72h). 2:1 - 16 (12h), 17 (24h), 18 (72h). 5:1 - 12 (12h), 13 (24h), 15 (72h)	https://doi.org/10.1016/j.reactfunctpolym.2015.06.010				56
Double sided massive silver coupons (elemental Ag), approximately sized 2.5 × 1.0 × 0.05 cm	0.15 M NaNO3and 0.15 M NaNO3with 1 g L−1 BSA in miliQ water up to 24 h (pH 7, 25 °C)	uncontrolled ion release	Ag ions; Cumulative Ag release: NaNO3 without BSA - 0.2μg cm−2 (2-24h), NaNO3 with BSA - 0.5 μg cm−2 (2h), 0.8 μg cm−2 (8h), 2.5 μg cm−2 (24h). Release rate: 0.016 μg cm−2 h−1 in non-protein containing NaNO3 and 0.11 μg cm−2 h−1 in NaNO3 with BSA after 24 h	https://doi.org/10.1039/C5CP02306H				57
titanium coated with nanocomposite TiCaPCON films containing Ag nanoparticles. Four samples: F1 and F2 coated composite sputtering and Ag ion implantation, F3 and F4 by co-sputtering of composite and Ag. F2 and F4 - thin surface layer with high Ag content removed. Surface Ag content: F1 - 15%, F2 - 4%, F3 - 10%, F4 - 1%	samples immersed in 40 mL of normal saline (0.9% NaCl solution). 1 ml of the solution was collected after 1, 3, 5 and 7 days	uncontrolled ion release	Ag ions; cumulative release in ppb -> F1: 30 (d1), 33 (d3), 40 (d5), 44 (d7). F2: 10 (d1), 29 (d3->d7). F3: 100 (d1), 150 (d3), 300 (d5->d7). F4: 175 (d1), 220 (d3), 300 (d5->d7). Data estimated from graph	https://doi.org/10.1016/j.colsurfb.2015.06.059				58
titanium foils coated with TiO2 nanotubes doped with Ag ions. 4 doses of ions implanted: 1×10^17 (S1), 5×10^17 (S2), 1×10^18 (S3) and 2×10^18 (S4) ions/cm2	coated samples were immersed in 6 ml of PBS for 1 day in dark, taken out, and then immersed again in 6 ml of fresh PBS. This process was repeated for a total of 10 days	uncontrolled ion release	Ag ions; release by day - S1: 0.31 ppm (d1), steadily declining to 0.29 ppm (d10). S2: 0.32 ppm (d1) declining to 0.3 ppm (d10). S3: 0.36 ppm (d1), 0.33 ppm (d3->d10). S4: 0.39 ppm (d1), 0.34 ppm (d3), 0.32 (d5->d10).	https://doi.org/10.1016/j.matlet.2015.08.125				59
aluminum sheet (6.0 cm × 7.5 cm) coated with polyester resin powder containing modified natural chabazites and Ag and Cu ions	1) Coated surface were immersed in DI water for 8 weeks in closed container with occasional mild oscillation 2) coated surface was immersed into 0.01 M NaNO3 solution for 7 days to check the leaching of silver ions in presence of counter ions	uncontrolled ion release	Ag ions; 1) no trace of silver found in DI water after 8 weeks (no ions were available for ion exchange). 2) cumulative Ag release -> 0.003 ppm (d1), 0.009 (d2), 0.011 (d5), 0.018 (d7).	https://doi.org/10.1039/C6RA14295H				60
13 mm cover slips substrates coated with Allylamine plasma polymer containing Mercaptosuccinic acid (MSA)-modified Ag nanoparticles. Total silver density on the glass substrate was 0.946 ± 0.064 μg cm−2.	samples were immersed in 6 mL of phosphate buffered saline (PBS, Coring, USA) at 37 °C in the dark. The solution was refreshed every day. The PBS containing the released Ag was collected at time points of 1, 4, 7, 14, 21, and 28 days	uncontrolled ion release	Ag ions; release rate by days: 5.00 ± 0.63 ppb on day 1, 2.02 ± 0.04 ppb on day 4, 1.5 ppb on day 7, 0.8 on day 14, 1.00 ± 0.55 ppb on days 21 and 28 (plateau)	https://doi.org/10.1039/C5TB02482J				61
porous Surlyn (Poly(ethylene-co-methacrylic acid) zinc salt) membranes coated with Ag nanoparticles. Coatings with different Ag wt/vol used with measured Ag content: 1) 0.01 - 3.5 μg mm−2, 2) 0.10 - 7.2 μg mm−2, 3) 0.25 - 10.5 μg mm−2, 4) 0.50 - 34.5 μg mm−2, 5) 0.75 - 46.8 μg mm−2, 6) 1 - 135.1 μg mm−2, 7) 5 - 219.5 μg mm−2, 8) 10 - 270.4 μg mm−2	Ag release was studied by dipping the membranes in water for 30 min	uncontrolled ion release	Ag ions; release after 30 min: 1) not detected 2) 0.01 ppm 3) 0.03 ppm 4) 0.05 ppm 5) 0.08 ppm 6) 0.10 ppm 7) 0.18 ppm 8) 0.22 ppm	https://doi.org/10.1039/C6RA18043D				62
Ag ions and Cu ions incorporated diamond-like carbon coatings on polyethylene (d=10mm). Three coatings with different Ag ion content: 1) 1 × 10^17, 2) 5 × 10^16 and 3) 1 × 10^16 cm−2	samples immersed in 10 ml phosphate buffered saline (PBS) and sealed for 10 days at 37 °C. Every 24 h PBS was harvested and replaced	uncontrolled ion release	Ag ions; release by days in μg cm−2: 1) 1.1 (d1), 0.85 (d2), 0.55 (d3), 0.4 (d4), 0.3 (d5), 0.25 (d6->d10). 2) 0.95 (d1), 0.7 (d2), 0.35 (d3), 0.25 (d4), 0.15 (d5->d10). 3) 0.15 (d1), 0.05 (d2->d10)	https://doi.org/10.1186/s40824-016-0062-6				63
Mg alloy plates coated with polycationic copolymer of dopamine and 2-(methacryloxy)ethyl trimethylammonium chloride with embedded dextran sulfate-stabilized Ag nanoparticles	coated samples (1 × 1 cm2) were immersed in 100 ml water and the temperature was kept at 37 °C in a shaking incubator. At 3, 4, 5, 6 nd 7 days the release solution was collected	uncontrolled ion release	Ag ions; cummulative release: 5 ppb (d3), 21 ppb (d4), 48 ppb (d5), 55 ppb (d6), 60 ppb (d7). In total, less than 10% of loaded silver was released in 7 days.	https://doi.org/10.1016/j.surfcoat.2015.12.018				64
titanium coated with porous TiO2 containing Ag nanoparticles. total Ag content was 8.57 ± 1.01 μg/cm2	immersed in 6 mL of PBS at 37 °C in darkness for 4 weeks. The entire volume was collected at predetermined time points, and fresh PBS was refilled accordingly	uncontrolled ion release	Ag ions; In the initial 6 h, ∼2.65 μg/cm2(a fraction of 30.9%) of Ag+was leached into PBS, at an average rate of 0.44 μg/cm2/h. The value then neared 4.75 μg/cm2(55.4% of total) upon 1-d immersion, and kept gaining slowly over an extended period of time. After 28 d, there was 5.1% Ag remaining	https://doi.org/10.1016/j.biomaterials.2015.10.035				65
poly(2-methyl-acrylic acid 3-acetylsulfanyl-2-hydroxy-propyl ester-co-N-isopropylacrylamide) (PNIPAM-ATE) and PNIPAM-SH (polymer with thiol groups) hydrogels containing Ag nanoparticles. Thiols chelate AgNPs	coated samples were immersed in 10.0 mL deionized water and vibrated in thermostatic water bath oscillators at 25° C. At intervals, 2.0 mL solution was extracted	uncontrolled ion release	Ag ions; Cummulative Ag release: PNIPAM-ATE - 0.024 mg (10min), 0.038 mg (30min), 0.04 mg (2h->12h). PNIPAM-SH - 0.007 mg (10min), 0.009 mg (30min), 0.011 mg (2h), 0.013 mg (4h->12)	https://doi.org/10.1039/C6NJ02246D				66
polydimethylsiloxane (PDMS) coated with pentafluorophenyl methacrylate (PFM) and glucosamine with Ag nanoparticles. total amount of silver in coated samples about 0.45 ± 0.15 μg/mm2	coated samples were immersed in 5 mL of tryptic soy broth (TSB) and in 5 mL of Milli-Q water at 37 °C. After the desired time, 4 mL of each solution was collected for analysis and replaced with 4 mL of fresh solution. The solutions were replenished and analyzed each day for 20 days. For the anoxic silver release, experiments were carried out in an argon atmosphere and used degassed Milli-Q water …	uncontrolled ion release	Ag ions; 0.6 and 1.1 ppm (from TSB media and Milli-Q water, respectively) in the first 24 h. During the following 10 days of immersion, a concentration decay and a subsequent stabilization of silver ion release of about 0.1 ppm can be observed. Anoxic conditions: 0.3 and 0.5 ppm for TSB and water, respectively, in the first 24 hours (desorption release). Minimum cited conc. for antibacterial acti…	https://doi.org/10.1021/acsami.5b07115				67
Ag nanoparticle/poly(ethylenimine)‐coated cotton fabric (Ag content not given)	immersed in 10 mL culture media for 12 h at 37 ºC (culture media unspecified)	uncontrolled ion release	Ag ions; final concentration - 0.48 μg mL−1.	https://doi.org/10.1002/adfm.201504197				68
Mg discs coated with fluoridated hydroxyapatite containing elemental Ag deposited by immersion (iAg-FHA) or coelectrodeposition (eAg-FHA). iAg-FHA coating - 55.1 of Ag in weight percentage	Ag incorporated samples were immersed in modified simulated body fluid (aqueous solution of 142 mM Na+, 5 mM K+, 1.5 mM Mg2+, 2.5 mM Ca2+, 103 mM Cl-, 10 mM HCO3-, 1 mM HPO42-, 0.5 mM SO42-, buffered at pH 7.40 at 36.5°C with HEPES) at a ratio of 5 mL cm–2at 37 °C. The interval Ag+ ion release concentration at 1, 4, 7, 10, and 14 days was evaluated	uncontrolled ion release	Ag ions; A burst release of Ag+ ions was observed for both coatings in the first 24h of immersion, which were 0.70 ± 0.01 ppm (iAg-FHA) and 0.25 ± 0.01 ppm (eAg-FHA). After 4 days - 0.7 ppm (iAg-FHA), 0.06 (eAg-FHA). Ater 7 days - 0.5 ppm (iAg-FHA), below 20 ppb (eAg-FHA). The Ag+ ions concentration decreased to 0.058 ppm at 14 days for the iAg-FHA/Mg, whereas the Ag+ release has been below 20 pp…	https://doi.org/10.1021/acsami.5b10825				69
Glass coverslips (22 × 22 mm) coated with Ag nanoparticles. Particle number density was 3.0 ± 0.43 × 10^5 particles/mm2	coated samples immersed in 15 mL sterile minimal Davis media (0.7 g/L K2HPO4, 0.2 g/L KH2PO4, 1 g/L (NH4)2SO4, 0.5 g/L sodium citrate, 0.1 g/L MgSO4·7H2O, and 1 g/L glucose, pH 7.2) at RT in dark, incubated for up to 72 h	uncontrolled ion release	Ag ions; cumulative release: 2.5 ppb (initial), 3.5 ppb (1h), 7 ppb (45h), 14.5 ppb (72h)	https://doi.org/10.1016/j.jcis.2015.12.049				70
Ti plates coated with Ag nanoparticles and vancomycin incorporated in titania (TiO2) nanotubes. Two tested coatings - without vancomycin (NT-Ag) and with vancomycin (NT-Ag-V)	Ag release: The NT-Ag and NT-Ag-V specimens were soaked in 10 mL of phosphate buffered saline (PBS) or trypticase soy broth (TSB) for 1, 4, 7, 14, 21, and 28 days at 37 °C without agitation. Vancomycin release: NT-V and NT-Ag-V samples were individually immersed in 1 mL of PBS on a 24-well plate at room temperature and agitated at 70 rpm. After the specific time intervals, a 500 μL of the sample …	uncontrolled ion and drug release	Ag ions, vancomycin; Ag - NT-Ag and NT-Ag-V are immersed in PBS or TSB for one month but no detectable silver ion (Ag+) release is observed. Vancomycin - In the first half an hour, over 50% of vancomycin is released from NT-V and NT-Ag-V. NT-V release: 800 μg/ml (30min), 360 μg/ml (1h), 120 μg/ml (2h). NT-Ag-V release: 850 μg/ml (30 min), 370 μg/ml (1h), 120 μg/ml (2h). Concentrations of vancomyc…	https://doi.org/10.1021/acsami.6b02803				71
TiO2 substrates coated with polydopamine (pDA) and Sulfobetaine acrylamide (SBAA) with embedded Ag nanoparticles	coated samples were placed into 15 mL centrifuge tubes, containing 5 mL of 0.85% NaCl solution, and incubated in a water bath at 37 °C without agitation. Samples were removed daily and placed into new tubes containing 5 mL of fresh saline solution, for up to 9 days	uncontrolled ion release	Ag ions; cumulative Ag release - pDA-Ag: 300 ppb (d1), 550 ppb (d2), 800 ppb (d3), 1150 ppb (d5), 1500 ppb (d7), 1900 ppb (d9). pDA-Ag-SBAA: 100 ppb (d1), 180 ppb (d2), 220 ppb (d3), 300 ppb (d5), 500 ppb (d7), 580 ppb (d9) (Data estimated from graphs). Ag+release rate for pDA-18-Ag (195.7 ± 6.1 ppb/day). pDA-18-Ag-SBAA (83.3 ± 1.6 ppb/day). Plateau not reached for either coating	https://doi.org/10.1021/acs.langmuir.6b00990				72
glass slides coated with pure hexamethyldisiloxane (pMHDSO) or silica (SiOx) containing Ag nanoparticles. 4 coatings: pMHDSO/AgNP, SiOx/AgNP, and coatings with added 10 nm overlayer (pMHDSO/Ag/pMHDSO and SiOx/AgNP/SiOx). size of samples (1.13 cm2)	samples were immersed into 10 ml distilled water in small bottles made of high density polyethylene (HDPE) at room temperature for different time intervals (2 h, 1 day, 3 and 7 days)	uncontrolled ion release	Ag ions; 1) cumulative Ag release in μg/cm2 - pMHDSO/Ag/pMHDSO: 0.001 (d1), 0.003 (d3), 0.012 (d7); release rate - 0.002 μg·cm− 2·day− 1. SiOx/Ag/SiOx: 0.5 (d1), 0.7 (d3->d7); release rate 0.05 μg·cm− 2·day− 1 . pMHDSO/Ag and SiOx/Ag: 1.25 μg/cm2 (d1->d7). 2) SiOx/Ag/SiOx with 1, 2 and 5 layers of AgNPs: 1 layer - 0.5 (d1), (d1), 0.7 (d3->d7), 2 layers - 0.9 (d1), (d1), 1.0 (d3->d7), 5 layers - 1…	https://doi.org/10.1016/j.surfcoat.2016.03.097				73
porous titanium covered with nanotubular titanium oxide immersed in AgNO3 (0.02, 0.1, and 0.5 M). Ag wt%: NT-0.02Ag - 3.86, NT-0.1Ag - 9.74, NT-0.5Ag - 14.88	samples were immersed in 25 mL of daily refreshed ultrapure water that was kept at 37 ± 0.5 °C. The water was sampled at specific time points (i.e., 1, 3, 5, 7, and 15 days)	uncontrolled ion release	Ag ions; cumulative Ag release - NT-0.02Ag: 1 ppm (d1), 2 ppm (d3->d15). NT-0.1Ag: 2.5 ppm (d1), 4.5 ppm (d3), 6 ppm (d5), 6.5 ppm (d7), 7 ppm (d15). NT-0.5Ag: 8.5 ppm (d1), 11.5 ppm (d3), 14 ppm (d5), 15 ppm (d7), 17 ppm (d15).	https://doi.org/10.1021/acsami.6b03152				74
stainless steel (20 mm × 20 mm) coated with elemental silver (Ag) or Ag nanoparticle/amorphous carbon nanocomposite (Ag/a-C, 20 at.% Ag). Total deposited Ag mass equal for both coatings	Samples were immersed into a vessel containing 50 ml of 0.9% NaCl at room temperature. 2 ml of the solution were taken out after 0, 2, 6, 12 and 24 h	uncontrolled ion release	Ag ions; cumulative Ag release in ppb cm−2: Ag coating - 15 (2h), 16 (6h), 20 (12h), 35 (24h). Ag/a-C - 8 (2h), 20 (6h), 38 (12h), 59(24h)	https://doi.org/10.1016/j.apsusc.2016.03.113				75
multiple types of hydroxyl-rich cationic polymers from a star-like poly(glycidyl methacrylate) with ethylenediamine (ED), N,N-dimethylethylenediamine (DED) containing elemental Ag. The Ag contents of QPGDED-C6H13-Ag, QPGDED-CH3-Ag, PGED-Ag, QPGED-DED-C6H13-Ag and QPGED-DED-CH3-Ag are 9.3%, 9.4%, 9.6%, 9.1% and 10.2%, respectively	40 mL of aqueous solution containing 1 mg mL−1of the Ag-loaded polymer was dialyzed against deionized water, and the deionized water was changed every 24 h. After a period of time (5, 10, and 15 days), 10 mL of the polymer solution was taken from the dialysis bag, and lyophilized for 72 h to completely remove water. The released Ag was determined by subtracting the amount of remnant Ag from the i…	uncontrolled ion release	Ag ions; release of Ag in water - nearly at a constant rate of 3.3% of coated Ag per day within 15 days for all of the tested samples, from initial ~9.5% avg to ~5.5% avg Ag content	https://doi.org/10.1039/C6PY01242F				76
UV-curable polyethyleneimine (QUV-PEI) hydrogels containing AgNO3. Ag content: QUV-PEI Gel 7- 0.05 g AgNO3, QUV-PEI Gel 6 - 0.01 g AgNO3	hydrogels were immersed in deionized water for different time periods, 24 h or 48 h	uncontrolled ion release	Ag ions; The leaching of (Ag/Ag+) contents from QUV-PEI Gel 7 was the highest among the other QUV-PEI Gels and indicated the 0.497 ppm. QUV-PEI Gel 6 with five times less equivalent AgNO3 in the gel formulation showed 0.108 ppm. No further info given	https://doi.org/10.1016/j.msec.2016.06.005				77
titanium denal implants coated with electrodeposited elemental Ag (surface atomic % 3.2 ± 1.0)(Ti-Ag) or 3-(triethoxysilyl)propyl succinic anhydride (TESPSA) silane (Ti-TSP)	Blood and lymph fluid samples were extracted before implant insertion and after euthanasia. Five samples of 0.2 ml were analyzed for each animal. Additionally, about 0.2 g of soft tissue was extracted from the vicinity of each dental implant	uncontrolled ion release	Ag ions, Ti; no significant systemic release of silver or titanium (< 50 ng/g for Ti and < 10 ng/g for Ag) in blood or lymph fluid for any of the samples extracted before implant insertion or extracted after euthanasia. Tissue samples - silver detected in the tissues around dental implants treated with silver (2392.3 ng/g). Titanium detected in tissue samples of animals with Ti-TSP implants (1827…	https://doi.org/10.1016/j.msec.2016.07.020				78
glass slides coated with titania–silica bilayer mesoporous thin film (MTF) loaded with Ag ions (25% Ag content) or Ag nanoparticles (34%)	successive 24 h-exposure of films to a fresh 350 μL-aliquot of water for 10 days	uncontrolled ion release	Ag ions; cumulative Ag release in μg after a number of cycles (approximated from graphs): AgNP - 0.8 (c1), 1.8 (c2), 2.9 (c3), 3.5 (c4), 4.5 (c5), 5.1 (c6), 5.5 (c7), 6.1 (c8), 6.7 (c9), 7.2 (c10). Ag - 1 (c1), 2.2 (c2), 3.2 (c3), 4 (c4), 4.5 (c5), 5.1 (c6), 5.2 (c7), 5.8 (c8), 6.1 (c9), 6.5 (c10). Ag release in μg by cycle: AgNP - 0.75 (c1), 1.1 (c2), 1.05 (c3), 0.8 (c4), 0.8 (c5), 0.6 (c6), 0.6…	https://doi.org/10.1016/j.micromeso.2016.08.034				79
Cross-linked poly-N-isopropyl acrylamide (NIPAM) and 2,3-Bis((2,3-bis(ethylthio)-propyl)thio)propyl methacrylate (BTM) hydrogels containing embedded Ag nanoparticles. 5 polymers based on NIPAM:BTM - H0 (100:0, Ag - 5.80 mg/g), H1 (100:1.25, Ag - 25 mg/g), H2 (100:2.5, Ag - 55 mg/g), H3 (100:5, Ag - 70 mg/g), H4 (100:10, Ag - 77.18 mg/g).	sample disks were immersed into 10.0 mL physiological saline solution in sample vials at 22 ± 0.5 °C. The vials were placed on an oscillator at 22 °C. The release media were replaced periodically with an equal volume of fresh solution after 1, 3, 5, 15, and 28 days	uncontrolled ion release	Ag ions; cumulative Ag release in mg/g: H0 - 0.25 (d1), 0.4 (d5), 0.75 (d15), 0.75 (d28). H1 - 0.3 (d1), 0.75 (d5), 1.2 (d15), 1.4 (d28). H2 - 0.55 (d1), 1.1 (d5), 1.5 (d15), 1.7 (d28). H3 - 0.35 (d1), 0.8 (d5), 1.5 (d15), 1.7 (d28). H4 - 1.25 (d1), 2.25 (d5), 3.1 (d15), 3.75 (d28). Plateau not reached, some Ag remains in the coating. Release kinetics: T1/2 = half loading Ag released from the hyd…	https://doi.org/10.1007/s00396-016-3967-7				80
Thin films of polystyrene-block-poly-4-vinylpyridine (PS-P4VP) containing Ag nanoparticles and fullerene (C70). AgNPs prepared by UVC or NaBH4 reduction	Films were positioned at the bottom of well plates (2 cm2/well) and were covered with 400 μL of DI water for up to 4 days. Films were agitated by orbital shaking at 75 rpm and were kept in the dark	uncontrolled ion release	Ag ions; cumulative Ag release: UVC-reduced Ag C70/PS-P4VP initial release - 2.77 ± 0.87 μg/cm2, after 24h - ~5 μg/cm2, after 4 days - 5.66 ± 0.97 μg/cm2. NaBH4-reduced initial release - 0.75 ± 0.12 μg/cm2,after 24h - 2.5 μg/cm2, after 4 days - 3.51 ± 0.33 μg/cm2.	https://doi.org/10.1021/acsami.6b10674				81
polyethylene endotracheal tubes coated with tetraethyl orthosilicate/methacryloxypropyl trimethoxy silane/methyltriethoxysilane/Ag‐SiO2	coated tubes were dipped into tepid (40° C) and hot (80° C) water for 24 h	uncontrolled ion release	Ag ions; release at 40°C - 0.005 µg/L, release at 80° C - 0.009 µg/L	https://doi.org/10.1002/jbm.b.33530				82
glass samples coated with PEI-Silane Self-Assembled Monolayers containing Ag nanoparticles	coated samples (21 × 26 mm coated on both sides, total coated surface 10.92 cm2) immersed in 3 mL of ultrapure water for 48 h	uncontrolled ion release	Ag ions; total release - 0.075 (0.030) μg/cm2 of silver, about 4% of total grafted silver	https://doi.org/10.3390/nano7010007				83
3D-printed antibacterial impland coated with polymer consisting of polyvinyl alcohol (PVA) and polyacrylic acid (PAA) in different ratios with embedded Ag nanoparticles	water	uncontrolled nanoparticle release	Ag nanoparticles; cumulative release in mg/L in different PVA:PAA ratios: 2:1 - 5 (10min), 10 (30min), 25 (70->100min). 1:1 - 10 (10min), 20 (30 min), 40 (70->100min). 1:2 - 15 (10min), 27 (30min), 70 (70->100min). 1:3 - 25 (10 min), 35 (30min), 75 (70min), 80 (100min) - data estimated from graphs. Complete AgNP release time: 1:4 - 1.9h, 1:3 - 2.32h, 1:2 - 3.5h, 1:1 - 5.4h, 2:1 - 12.8h, 5:1 - 128…	https://doi.org/10.1039/C7TB00478H				84
Poly(ether ether ketone) discs coated with polydopamine containing Ag nanoparticles	10 mL of PBS solution at 37 °C for 20 days under agitation (100 r min−1) and periodic replacements of PBS	uncontrolled ion release	Ag ions; cumulative Ag release in μg mL−1: 5 (1d), 8 (5d), 8.8 (10d), 9.8 μg mL−1(20d)	https://doi.org/10.1039/C7TB02436C				85
silica (SiO2) nanorattles containing Ag nanoparticles. Material not tested as surface coating. Silver content - 3.3% for Ag@SiO2-1, 3.4% for Ag@SiO2-2 to 22.8% and Ag@SiO2-3	10 mg of Ag@SiO2nanorattles were resuspended in 5 mL water by vortexing and sonication (30 min). After dilution to a concentration of 0.2 mg mL−1the suspension was split into samples of 1 mL. Those were shaken at 37 °C (200 rpm) in the dark for the required time periods.	uncontrolled ion release	Ag ions; cumulative Ag release 3 to 4 μg mL−1 for all three Ag@SiO2, reached after 2-4h. This release corresponds to 50% of total silver content for Ag@SiO2-1, 10% for Ag@SiO2-2 and 8% for Ag@SiO2-3	https://doi.org/10.1016/j.nano.2016.08.002				86
thin film composite nanofiltration membrane Filmtec NF 90 coated with polyvinyl alcohol (PVA) containing nanozeolite particles with Ag ions or Ag nanoparticles. PVA-H - zeolite surface coverage (22%), silver loading (37.5 mg/m2). PVA-L - zeolite surface coverage of 13%, silver loading of 18.6 mg/m2L+ and H+ samples - loaded with Ag+, L0 and H0 - loaded with AgNP	membrane sample (2 cm×1 cm) was immersed in 1.5 mL 154 mM (0.9% w/w) NaCl solution in a plastic centrifuge tube. The centrifuge tubes were shaken at ~90 rpm for 24 h on the orbital shaker, up to 7 days	uncontrolled ion release	Ag ions; cumulative Ag release after 7 days: PVA-L0 - 5 mg/m2 (34.70% of Ag content), PVA-L+ - 9 mg/m2 (52.76%), PVA-H0 - 12 mg/m2 (34.20%), PVA-H+ - 17 mg/m2 (45.71%). Release rate: PVA-L0 - 0.6 mg/m2/day, PVA-L+ - 1.7 mg/m2/day, PVA-H0 - 2.3 mg/m2/day, PVA-H+ - 3.8 mg/m2/day. Faster initial rate, slower rate afte 4-5 days.	https://doi.org/10.1016/j.memsci.2017.02.047				87
multi-walled carbon nanotubes (MWCNT)–Ag nanoparticles, glucosamine–AgNPs and MWCNT–glucosamine–AgNPs composites	samples were immersed in PBS (0.1 M, pH 7.4) solution and were shaken at 37 °C for 35 days	uncontrolled ion release	Ag ions; cumulative Ag release in ppm: MWCNT-AgNP - 5 (1d), 7 (3d), 12.5 (5d), 18 (d7), 23 (d14), 27 (d21), 33.64 ppm (35). Glucosamine-Ag-NP - 1 (1d), 2 (3d), 3 (5d), 12 (7d), 16 (d14), 25 (d21), 29 (d35). CNT-glucosamine-Ag-NP - no release detected	https://doi.org/10.1039/C7NJ01199G				88
glass beads coated with silicone nanofilaments with embedded Ag nanoparticles, and glass beads coated with AgNPs. Ag content: SNF-AgNP - 516 ± 11 μg per gram of glass beads, AgNP 17 ± 1 μg per gram	coated glass beads were incubated in 0.9% NaCl solution for 24 h	uncontrolled ion release	Ag ions; release in 24h: AgNP‐SNF‐coated glass beads - 0.13 ± 0.01 μg mL−1per gram of glass beads, AgNP‐modified glass beads - 0.07 ± 0.01 μg mL−1per gram	https://doi.org/10.1002/smll.201601072				89
stainless steel coated with Ag nanoparticle/silica composites	coated samples were incubated in 1) 3 vol-% acetic acid (0.5 cm2/mL) for 2 h, 4 h, 24 h and 10 days at 40 °C, 2) artificial milk (1.58 g/L KH2PO4, 0.975 g/L K3C6H8O3·H2O, 1.42 g/L Na3C6H8O3·3H2O, 0.179 g/L K2SO4, 0.300 g/L K2CO3, 0.600 g/L KCl, 1.32 g/L CaCl2·2H2O, 0.653 g/L MgCl2·6H2O, 0.1 cm2/mL) at 25 °C, pH 6.5, for 2, 4, 24, and 168 h96, 288, and 432 h	uncontrolled ion release	Ag ions; Ag release: 1) Most silver (>90%) remained in the coating even after 10 days of continuous exposure. Cumulative release in μg/cm2: 0.1 (2h), 0.75 (24h), 2.1 (10d). 2) total release: less than 0.3 μg/cm2 in 168 hours (large variations between replicates and possible underestimation of release because of salt precipitation)	https://doi.org/10.1016/j.apsusc.2016.11.207				90
polyvinylidene fluoride membranes coated with dopamine grafted sulfonated heparin-like polymer (DASHP) and dopamine grafted chitosan (DACS) containing Ag nanoparticle-loaded oxidized carbon nanotubes (oCNT). DASHP/AgNPs@oCNT (Ag content 3.72% at), DACS/AgNPs@oCNT (Ag content 3.66% at)	samples were soaked in PBS (pH 7.4) at 37 °C	uncontrolled ion release	Ag ions; cumulative Ag release in wt% of AgNPs: bare AgNPs - 0.5 (6h), 1.1 (12h), 1.6 (24h), 2.9 (48h), 4 (72h). AgNPs@oCNT - 0.6 (6h), 1.2 (12h), 2 (24h), 3.7 (48h), 4.2 (72h). DACS/AgNPs@oCNT - 0.1 (6h), 0.2 (12h), 0.3 (24h), 0.5 (48h), 0.6 (72h). DASHP/AgNPs@oCNT - 0.1 (6h), 0.1 (12h), 0.2 (24h), 0.3 (48h), 0.5 (72h).	https://doi.org/10.1016/j.actbio.2017.01.027				91
touchscreen panels coated with thermoresponsive polymer (TRP)-incorporated Ag-nanoparticles with silica nanoparticles (SNPs) or carbon nanotubes (CNTs). Ag-SNP mass fraction = 0.51, Ag-CNT mass fraction = 0.46	water at 27 and 37° C (time not specified)	uncontrolled ion release	Ag ions; Ag release per day: Ag-SNP@TRP - 21 μgL−1 (27°C), 31 μg mL−1 (37° C). Ag-CNT@TRP - 21 μgL−1 (27° C), 37 μg mL−1 (37° C).	https://doi.org/10.1021/acsami.7b05167				92
Ag nanoparticle/titanium oxide nanocomposite coatings deposited on 0.25 cm2Si substrates. 15 vol% Ag nanocomposites were produced with different total pressure of 0.15, 0.45 and 1.17 Pa	10 ml air saturated deionized water (pH 7, σ = 0.06 μS/cm at 13 °C) in small bottles made of high density polyethylene (HDPE) at room temperature for 40 min, 2 h, 1 day, 3 days, 7 days	uncontrolled ion release	Ag ions; Ag release in μgL−1 and % of total deposited Ag: 0.15Pa - 3/3% (40min), 4/4% (2h), 12/9% (1d), 18/13% (3d), 27/22% (7d). 0.45Pa - 9/8% (40min), 12/10% (2h), 21/17% (1d), 29/24% (5d), 38/32% (7d). 1.17Pa - 18/16% (40min), 32/28% (2h), 56/47% (1d), 60/51% (3d), 67/56% (7d).	https://doi.org/10.1007/s00339-017-1088-x				93
elemental Ag dots (20 μm diameter and 450 nm height) on Ti substrate. Deposited Ag mass - 18.3 μg	samples were immersed into 1 mL of Ampuwa water at 37 °C for 7 days	uncontrolled ion release	Ag ions; 0.7 μg (i. e. approx. 4 %) of the Ag content in the coating were released during the 7 d water treatment	https://doi.org/10.1002/celc.201700247				94
three-layer system of nanocrystalline hydroxyapatite (first layer; 1000 nm thick), Ag nanoparticles (second layer; 1.5 μg Ag cm−2) and calcium phosphate (third layer, either 150 or 1000 nm thick) on titanium	samples were incubated in PBS (5 mL, pH 7.4) for 3 days at 37 ± 2 °C	uncontrolled ion release	Ag ions; release after 3 days: 1000 nm uper layer - 0.45 μg mL−1 Ag per cm2 (30% of the original silver content). 150 nm upper layer - 0.85 μg mL−1 Ag per cm2 (48% of the original silver content)	https://doi.org/10.1016/j.colsurfb.2017.05.016				95
tanned leather and polyurethane leatherette with deposited Ag nanoparticles. Total Ag content - "tens–hundreds of ppb", 0.5 ± 0.2 at%	samples immersed in PBS for 24h	uncontrolled ion release	Ag ions; cumulative release: leather - 90 ppb (4h), 130 ppb (9h), 150 ppb (24h). Leatherette - 120 ppb (4h), 130 ppb (9h), 160 ppb (24h).	https://doi.org/10.3390/nano7080203				96
highly porous titanium implants coated with chitosan (Ch) and gelatin (Gel) with embedded Ag ions (Ag) and vancomycin (Van). Initial content for Ag and Van not specified	Ag release: samples were immersed in 500 μL of Milli-Q water at 37 ± 0.5 °C. The measurements were performed for time points 6 h, and 1, 3, 7, 14, and 21 days. The medium was refreshed completely after each time point. Vancomycin release: samples were immersed in PBS 37 ± 0.5 °C for 6 h, and 1, 3, 7, 14, and 21 days	uncontrolled ion release	Ag ions, vancomycin; Ag release - Ch/Gel/Ag: 20 ppm (6h), 9 ppm (d1), 5 ppm (d3), 4 ppm (d21). Ch/Gel/Ag/Van: 5 ppm (6h), 4 ppm (d1), 2 ppm (d21). Vancomycin release - Ch/Gel/Van: 140 μg/mL (6h), 90 μg/mL (1d), 15 μg/mL (d3), 4 μg/mL (d7), 2 μg/mL (d14), 1 μg/mL (d21). Ch/Gel/Ag/Van: 20 μg/mL (6h), 15 μg/mL (d1), 9 μg/mL (d3), 3 μg/mL (d7), 0.7 μg/mL (d21). The MIC values of vancomycin and silver…	https://doi.org/10.1021/acsami.7b04950				97
glass discs coated with (dopamine-Poly(acrylic acid)PAA/ poly(ethyleneimine)PEI-Ag nanoparticle)n multilayers. total amount of Ag in the multilayer films were 43 ± 5.6 μg/cm2; (3 bilayers) and 388 ± 35.8 μg/cm2; (12 bilayers)	samples (1 det2) were immersed in deionized water at 37 °C. 500 μL of the solution was removed and replaced at 0h, 0.25h, 0.5h, 1h, 2h, 4h, 8h, 12h, 24h, 48h, 72h, 96h, 120h, 144h	uncontrolled ion release	Ag ions; cumulative Ag release in μg/mL: (dopa-PAA/PEI-Ag NPs)12 - 180 (24h), 185 (48h), 215 (120h), 220 (144h). (dopa-PAA/PEI-Ag NPs)3 - 95 (24h), 100 (48h), ~110 (144h). Initial concentration - 0, sharp increase in 24 h and sustained release for 120 h.	https://doi.org/10.1016/j.polymertesting.2017.06.023				98
Ag nanocomposites (AgNCs), AgNO3, Ag nanoparticles (10 and 60nm diameter - AgNP10 and AgNP60) embedded in zein (protein) films	films were immersed in 20 mL water in dark for 3 days, and every half day 1 mL of surrounding solution was collected	uncontrolled ion release	Ag ions; cumulative Ag release as percentage of total Ag content: AgNO3 - 6% (1d), 7.5% (2d), 10% (3d). AgNC - 4% (1d), 9% (2d), 15% (3d). AgNP10 - ~1% (1->3d). AgNP60 - 1% (1d), 2% (2d), 3% (3d). The MICs of silver for AgNCs, AgNO3, AgNP10, and AgNP60 were 1.05, 0.525, 134.4, and 201.6 μg/cm2, respectively.	https://doi.org/10.1021/acsami.7b08152				99
polyethylene terephthalate coated with poly(hydroxymethyl 3,4‐ethylenedioxythiophene):polystyrene sulfonate (PEDOT‐MeOH:PSS) and (3‐aminopropyl)triethoxysilane with Ag nanoparticles covalently surface-bound by aminosilane linker	the AgNP composite device was electrically addressed with a 5 Hz, 4 Vpp square wave in sodium nitrate (1% w/v) for 24 h at 37 °C (square wave anodic stripping voltammetry (SWASV) method)	ion release stimulated by electrical current	Ag ions; concentration in electrolyte after 24h: 12.8 × 10−9± 6.3 × 10−9M; below the minimum inhibitory concentration (MIC, 100 × 10−9 M) and the minimum bactericidal concentration (250 × 10−9 M) reported for the tested S. aureus strain ATCC 25923	https://doi.org/10.1002/adhm.201700435				100
Ag nanoparticles immobilized on polyethyleneterephthalate foil	samples were immersed in 10 ml of distilled water and sonicated at 24 °C for 24 h	uncontrolled ion release	Ag ions; practically no Ag was detected in the leachates even after vigorous sample sonication. Concentration of Ag detected by ICP-MS was 9.0 ng l−1, which is practically the same value as the Ag background in the distilled water itself (2.0 ng l−1).	https://doi.org/10.1016/j.apsusc.2017.05.151				101
polyester filament fabric with acrylate coating containing Cu and Ag pigments. Ag applied in four different concentrations (5, 10, 20 and 30%)	textile disks were placed into 200 μl of Luria–Bertani (LB) or Trypticase Soy Yeast Extract (TYSE) culture media in 96 well plates and incubated for 3h at 37°C, rotating at 250 rpm	uncontrolled ion release	Ag ions; release after 3h in LB/TYSE: 5% Ag - ~25 μM, 10% Ag - ~35 μM, 20% Ag - ~45 μM, 30% Ag - ~50 μM	https://doi.org/10.1371/journal.pone.0188304				102
glass slides coated with a monolayer of silica-coated gold nanostars (GNS) decorated by Ag nanoparticles. Total Ag content 0.9 μg/cm2	samples (21x26 mm coated on both sides, total coated surface 10.92 cm2) were immersed in 3 mL of bidistilled water. Slides were taken out of water after 0.5, 5, 24 h, 48, 72 and 96h	uncontrolled ion release	Ag ions; cumulative release: 0.04 μg/cm2 (30min), 0.18 μg/cm2, 30% total silver (5h), 0.21 μg/cm2, 35% total silver (24h->96h)	https://doi.org/10.1038/s41598-017-05693-3				103
Titanium sheets (2 cm2) coated with poly(acrylic acid) containing chitosan and elemental Ag. Total Ag content - 5 ± 0.5 μg/cm2	coated sheets were incubated in 2 mL ultrapure water (Milli-Q resistivity 18.2 MΩ·cm at 25 °C) at 37 ± 2 °C for 1, 2, 7, 14, and 21 days	uncontrolled ion release	Ag ions; concentration of silver released in water reached a plateau of 0.08 ± 0.02 μg/cm2(corresponding to 83 ± 20 ppb) after 7 days of contact. More than 99% of Ag remained in the coating after 21 days 83 ppb released during 21 days).	https://doi.org/10.1007/s00216-017-0685-z				104
dopamine-functionalized poly(ether sulfone) membrane coated with N-isopropylacrylamide (NIPAAm) and sodium acrylate (AANa) copolymer containing Ag nanoparticles. Copolymers synthesized with varying NIPAAm-AANa mol ratios - 90-10, 85-15, 80-20, 75-25. AgNPs loading amounts of PES-90-10, PES-85-15, PES-80-20, and PES-75-25 were 5.1, 8.8, 13.5, and 18.3 μg/cm2, respectively	samples (1x1cm) were immersed in 2 mL of deionized water for up to 7 days	uncontrolled ion release	Ag ions, cumulative Ag release in μg/cm2: 90-10 - 2 (1d), 3.5 (2d), 4.5 (3->7d). 85-15 - 3 (1d), 4.5 (2d), 6 (3d), 7 (4d), 7.5 (5d), 8 (6->8d). 80-20 - 4 (1d), 6 (2d), 7 (3d), 8 (4d), 9 (5d), 11 (6d), 12 (7d), 13 (8d). 75-25 - 5.5 (1d), 9 (2d), 11 (3d), 12 (4d), 13 (5d), 14.5 (6d), 16 (7d), 17 (8d)	https://doi.org/10.1021/acsami.7b13238				105
quaternary Mg-3Sr-6Ca alloys coated with silver-doped hydroxyapatite (HA) in different amounts (0, 1 and 10 g/l)	samples immersed in simulated body fluid (aqueous solution of 142 mM Na+, 5 mM K+, 1.5 mM Mg2+, 2.5 mM Ca2+, 125 mM Cl-, 27 mM HCO3-, 1 mM HPO42-, 0.5 mM SO42-, buffered at pH 7.40 at 36.5°C with HEPES) at 37.0 °C ± 0.5 °C for 5 days, 10 days and 15 days. The solution was refreshed every 2 days.	coating degradation	Ag ions? Coefficient of degradation (mm/year): AgH0 - 0.45 (5d), 0.75 (10d), 0.9 (15d). AgH1 - 0.5 (5d), 1 (10d), 1.3 (15d). AgH10 - 0.5 (5d), 1.5 (10d), 2.2 (15d)	https://doi.org/10.1016/j.tsf.2017.10.033				106
poly(3-(dimethyl(4-vinylbenzyl)ammonio)propyl sulfonate)-g-poly(N-(2-Hydroxyethyl)acrylamide) hydrogel containing Ag nanoparticles	A hydrogel piece (0.5 cm × 0.5 cm × 2.05 mm) was added into a 50 mL beaker, then water was gradually added to the 10 mL scale of the beaker. The device was stirred at room temperature; after about 1 day the solution was removed and water was added to the 10 mL scale of the beaker. The 1 and 4 day immersed solutions were analyzed for silver content.	uncontrolled ion release	Ag ions; the initial concentration of released Ag+at day 1 was as high as ∼ 30 mg L−1, but Ag+concentration continuously decreased with time, finally reaching a very low level (<0.1 μg L−1) at day 5, confirming that almost all AgNPs were consumed	https://doi.org/10.1039/C7TB03018E				107
Poly(lactic-co-glycolic acid) polymer containing Ag nanoplates	no info	uncontrolled ion release	Ag ions; number of silver ions released from the PLGA-AgNPL film was below the limit of detection (0.01 ppm)	https://doi.org/10.1246/cl.171022				108
Polyurethane coated with elemental Ag and Cu. Different coatings: pure Ag, Ag(high)/Cu(low) - 78/22 wt%, Ag(medium)/Cu(medium) - 53/47 wt%, Ag(low)/Cu(high) - 30/70 wt%	coated samples (1x1cm) were incubated for 24 h in synthetic sweat (DIN EN ISO 105-E04:2013-08) at pH 5.5 at 37 °C.	uncontrolled ion release	Ag ions; released Ag: pure Ag - 100 μg/L, Ag(high)/Cu(low) - 90 μg/L, Ag(medium)/Cu(medium) - 200 μg/L, Ag(low)/Cu(high) - 380 μg/L	https://doi.org/10.1016/j.surfcoat.2017.09.036				109
stainless steel coated with 1) a base epoxy-silica hybrid sol synthesized by condensation of tetraethoxysilane and glycidoxypropil-trimetoxysilane, and enriched with Ag ions [TGAg], and 2) sols with the same composition and loaded with clay nanoparticles (1.5 wt%, TGAg-L1.5%)	samples immersed in deionized water at constant temperature (30 °C) setting the initial content of AgNO3at [Ag+]0 = 3% and a fixed area/volume ratio of approximately 0.2 cm2 mL−1with samples of 6 cm2,for 24h	uncontrolled ion release	Ag ions; TGAg coating - the silver releasing process starts fast at a rate of 13.5 ± 1.25%/h. At the 24 h of immersion, the 27 ± 1.3% of the silver initially available was released. 80% of silver in solution was released in the firsts 3 h of the test. TGAg-L1.5% - the starting rate of silver releasing was of 7.5 ± 1.25%/h and saturation was reached after approx. 6 h. Only a 20 ± 1.3% of the initi…	https://doi.org/10.1007/s10971-018-4600-7				110
titanium discs (Ti) and Anodized titanium dioxide nanotubes (NT) coated with polydopamine and Ag nanoparticles. Ag content not specified.	samples immersed in 15 mL phosphate buffered saline (PBS) at 37°C for 14 days. At each time interval (1, 3, 5, 7, and 14 days), the solution was collected and replaced with fresh PBS	uncontrolled ion release	Ag ions; cumulative Ag release in mg/L: Ag/PDA/NT - 0.2 (d1), 0.6 (d3), 1.1 (d5), 1.5 (d7), 1.7 (d14). Ag/PDA/Ti - 0.2 (d1), 0.5 (d3), 0.55 (d5->d14). Compared with the Ag/PDA/Ti’s burst release of Ag+ for three days, the Ag/PDA/NT’s release of Ag+ maintained stable during first 7 days soaking in PBS solution, and slowed down during the next 7 days.	https://doi.org/10.1177/0885328218755538				111
silicone rubber sheets coated with chitosan (CS), Polyvinylpyrrolidone (PVP), or (3-mercaptopropyl) trimethoxysilane (MPTS), and embedded with Ag ions	samples were immersed into PBS solution in a shaking incubator at 37 °C. The solution was collected from the incubation medium every day	uncontrolled ion release	Ag ions; cumulative Ag release: Ag/PVP - 0.60 mg/L (30 days), 0.71 mg/L (45 days). Ag/CS 0.49 mg/L (30 days), 0.56 mg/L (45 days). Ag/MPTS 0.37 mg/L (30 days), 0.45 mg/L (45 days). The Ag+concentration increased steadily with the extension of immersion period into PBS solution, exhibiting sustained-release kinetics without burst release. Plateau not reached.	https://doi.org/10.1007/s10853-017-1939-z				112
Phosphotungstate Ormosil (organically modified silicate) doped with core-shell (SiO2@TiO2) and Ag nanoparticles (POrs-CS-Ag). Different volumes of 0.1 % SiO2@TiO2 suspension (µL) added during synthesis: 0 (POrs-Ag), 20 (POrs-CS20-Ag), 100 (POrs-CS100-Ag), and 1000 (POrs-CS1000-Ag)	samples were immersed for 2h in sterile nutrient broth	uncontrolled ion release	Ag ions; Ag concentration in w/w% before/after immersion: POrs-Ag - 4.2/2.6, POrs-CS20-Ag - 3.7/3.4, POrs-CS100-Ag - 3.1/2.1, POrs-CS1000-Ag - 3.3/2.4	https://doi.org/10.1016/j.colsurfb.2017.12.016				113
Stainless steel coupons (10 × 20 × 1 mm) coated with electroplated copper-silver alloy containing elemental Ag. The composition of the copper-silver coating was 59 ± 2 wt% of copper and 39 ± 2 wt% of silver	Coated surfaces and uncoated stainless steel controls were incubated in PBS or Brain Heart Infusion (BHI) Broth, sterile or with different initial S.aureus concentrations (in Log CFU/mL), for 30min, 4 and 24h.	uncontrolled ion release	Cu and Ag ions; Ag ion release in μg·l−1: after 30 min - 9 (6.3 ± 0.5 Log CFU/mL), 29 (8.1 ± 0.3 Log CFU/mL), 7 (6.6 ± 0.1 Log CFU/mL), <5 (stain.steel ctrl), undetected (sterile PBS). After 4h - 15 (6.3 ± 0.5 Log CFU/mL), 70 (8.1 ± 0.3 Log CFU/mL), 13 (6.6 ± 0.1 Log CFU/mL), <5 (stain.steel ctrl), undetected (sterile PBS). After 24h - 11 (6.3 ± 0.5 Log CFU/mL), 31 (8.1 ± 0.3 Log CFU/mL), 26 (6.6…	https://doi.org/10.1016/j.surfcoat.2018.04.007				114

## Sheet: Chitosan and not silver
Search phrase:	( ( ( TITLE-ABS-KEY ( "antimicrob* coat*" ) OR TITLE-ABS-KEY ( "antibact* coat*" ) OR TITLE-ABS-KEY ( "antimicrob* surface*" ) OR TITLE-ABS-KEY ( "antibact* surface*" ) OR TITLE-ABS-KEY ( "biocid* surface*" ) OR TITLE-ABS-KEY ( "biocid* coat*" ) OR TITLE-ABS-KEY ( "antibiof* surface*" ) OR TITLE-ABS-KEY ( "antibiof* coat*" ) OR TITLE-ABS-KEY ( "antivir* surface*" ) OR TITLE-ABS-KEY ( "antivir* co…			62 hits			Comments
Material	Release medium and conditions (solution, dry abrasion, cleaning product etc)	Dissolution or shedding of particles; triggered/intentional or unconrolled continuous release/shedding	What was released and in which amount	DOI
Berberine releasing chitosan coating on Nano-hydroxyapatite/Polyamide66 Porous Bone Scaffold. Surface coatings prepared with 1, 3 and 5% chitosan in acetic acid.	PBS, pH 7.4, shaked 100rpm at 37C (10×5×5mm sample in 6 ml of PBS)	Berberine release in time (3h to 10 days); chitosan degradation in time (2,4,7,60 days)	Berberine was released with initial burst during first 48 h (0.02; 0.07; 0.09 mg/ml) followed by plateau reaching 0.03; 0.16; 0.22 mg/ml from coatings prepared with different chitosan concentrations (1, 3, 5% accordingly) after 10 days. Chitosan was degraded at a steady rate for the first 7 days (<2 mg/ml carbohydrates) reaching 2.30; 5.47; 8.09 mg/ml carbohydrates after 60 days for the same chit…	https://doi.org/10.1163/092050610X496576
Vancomycin releasing chitosan coating on titanium implants. Dfferent titanium surface morphologies coated with 1% chitosan and about 0.07 mg/ml vancomycin in acetic acid.	PBS, shaked 100 rpm at 37C (5 cm, 3.2‐mm diameter Ti6Al4V rods in 2 ml of PBS)	Vancomycin release in time (6, 12, 18 h)	Vancomycin was released with initial burst of about 1 mg/ml after 6 h dropping to 65 μg/mL after 12h and 8 μg/mL after 18 h. In total 2.2-2.46 mg vancomycin was released during 18 h from titanium surfaces with different surface morphologies coated with vancomycin releasing chitosan	https://doi.org/10.1002/jbm.a.33043
Minocycline releasing chitosan/alginate multilayer coating on titanium substrates (anti-biofilm).	PBS, pH 7.4, oscillator 100 rpm, at 37C (10 mm diameter Ti disks, 1 mm thick +coating, in 5 ml of PBS)	Minocycline release in time (1 h, 12 h and 1, 3, 5, 7, 14 days).	Minocycline was released with initial burst within 24h (starting from about 350 μg/ml at 1h) and stabilized by day 7 at < 50 μg/ml. The average concentration of minocycline at day 14 was 25.13 ± 4.1 μg/ml	https://doi.org/10.1016/j.jdent.2014.06.003
Ciprofloxacin (CFC) releasing chitosan coating on polypropylene (PP) hernia-repair prosthetic devices with higher (MB) or lower (MA) chitosan/CFC ratio. 2 wt% chitosan deposition solution with 0.18 wt% CFC (MA or 0.09 wt% CFC (MB)	5x5 cm coated mesh piece n 10 ml physiological solution (0.9 wt% NaCl and 0.1 wt% Tween 80) at 35C, no shaking	Ciprofloxacin and chitosan release in time (1, 2, 7, 14 days).	Chitosan has stabile low release during selected timepoints after initial burst during day one. 37% is released after 14 days (MA) or 57% for MB.Ciprofloxacin release reaches 4% (MA) or 0.4% (MB) after 14 days. The higher the chitosan/CFC ratio in the mesh coating, the lower is the release of CFC in physiological solution.Chitosan release was measured colorimetrically, ciprofloxacin by HPLC	https://doi.org/10.1039/C4TB00236A
Ciprofloxacin(CFC) releasing chitosan nanocoating on titanium implants.	0.25mm thick titanium foils in 3,5 ml 0.9 w/v% NaCl at 37C, no shaking	Ciprofloxacin and chitosan release in time (up to 7 days).	Ciprofloxacin was released with an inital burst of 60% released during first 6 h followed by further slow release with concentration reaching 11 μg/mL by 24 h and 13 μg/mL by 7 days	https://doi.org/10.1016/j.carbpol.2014.03.097
Gentamicin releasing poly-β-cyclodextrin–chitosan multilayer covered titanium	Gentamicin or TBO release: 1.49 cm titanium disc in 2 ml PBS at 37C and 80 rpm. Degradation (15 bilayer coating): 1.49 cm titanium disc in 10 ml PBS pH=7.4 or water, at 37C, no shaking for 28 days	Cyclodextrin-chitosan mutilayer degradation in time (up to 28 days). Toluidine Blue Ortho (TBO) imitation of antibiotic release (28 days)	Multilayer coating was less degraded in water then in PBS after 10 days. Cyclodextrin, but not chitosan in the multilayer completely degrades after 28 days in PBS. Antibiotic release (TBO model release) is dependent on the number of bilayers - more bilayers, more sustained release and prolonged inital burst. Release approached control after 7 days for all bilayer numbers. Extended antibiotic rele…	http://doi.org/10.1021/acsami.5b02402			https://www.semanticscholar.org/paper/Bioinspired-Titanium-Drug-Eluting-Platforms-Based-a-P%C3%A9rez-Anes-Gargouri/5e8c03e7488d9850a19fb6b35dd204f83b984b5f
Doxorubicin (DOX) or gentamycin sulfate (GS) loaded chitosan and dopamine-grafted heparin-like/-mimetic polymer (DA-g-HepLP) multilayer hydrogel thin films on homemade poly(ether sulfone) (PES) membranes	Drug release in pH=5.3 or pH=7.4 buffered solutions. Degradation: immersed in PBS for varied periods (from 0 to 32 days) or either 0.1 M NaOH, 0.1 M HCl or 5 M NaCl for 2 h.	Drug release in time (up to 48 h), degradation in acid, base or concentrated salt after 2h, degradation in PBS during 32 days.	Release of DOX (anticancer drug) and GS (antimicrobial drug) 8.2 and 10.1 μg/cm2, respectively and depended on pH - in PBS. The release of both DOX and GS showed two distinct stages: a relatively rapid release over the first 10 h, followed by a sustained long-term release. Release kinetics of proteins (BSA) was similar. Degradation: after 32 days soaking in PBS, the un-cross-linked multilayer sho…	https://doi.org/10.1021/acsami.5b09634
Cefepime releasing silica/chitosan/poly(ethylene oxide)(PEO) nanofibers electrospinned coating for implants. Glutaraldegyde cross-linked and not cross linked fibers with different chitosan content.	Cefepime release: 5 × 5 cm segments of chitosan/PEO/TEOS/cefepime nanofiber in 5 mL of SBF buffer at 37 °C. Stability of nanofibers evaluated by SEM after 24 h incubation in SBF buffers at pH 5.5, 7.4, 8.5 and 37 °C , stirred.	Cefepime release in time(16 days), nanofiber stability after 24 h	Most of the loaded cefepime in the nanofibers was released in the first hours. After a few hours, the release was much slower and reached a plateau after 23 h (UV-vis). The drug wasn’t released suddenly and the delivery happened moderately during the 16 days (no data shown).Stability/degradation: cross linked nanofibers were unstable and lose their structures in the buffer solutions, whereas the …	https://doi.org/10.1039/C6RA00071A
Tetracycline releasing chitosan–gelatin nanosphere coating on titanium, two Tc concentrations	Tc release: coated Ti disks in 15 mL PBS, without agitation,37 °C for up to 24 hours in dark. TEM analysis of surfaces.	Tc release in time (24 h), nanoparticle release from surface. Surface characteization by TEM	Tc was almost completely released after 3 hours of incubation, reaching a plateu. Accumulative release amounts were dependent on Tc content in the preparation. In addition, since the nanosphere could also be released from the coatings in TEM analysis, the function mode of the nanosphere coating could be: direct release of Tc, release of CSG–Tc nanosphere, or a combination of both.	https://doi.org/10.1039/C5RA17109A
Antifungal β-peptide loaded chitosan/hyaluronic acid PEM or poly-l-lysine/poly-l-glutamic acid PEM ( polyelectrolyte multilayer) coatings on polyethylene venous catheters	β-peptide release in PBS in 2 cm sealed end catheter piece at 37C	β-peptide release in time (ca 100 days)	β-peptide was released gradually into solution from both film systems. PGA/PLL films released β-peptide over a period of ∼100 days, release from tubes coated with HA/CH films plateaued after ∼50 days. Tubes coated with HA/CH films also released ∼1.6-fold more β-peptide than films coated with PGA/PLL films (∼4.3 μg versus ∼2.7 μg), consistent with the greater thicknesses of the HA/CH films	http://dx.doi.org/10.1021/acsbiomaterials.5b00427			"SLOW BURST" multilayer
cellulose nanofibers grafted with aminosilane, biomimetic "non-leaching" surfaces	zone of inhibition of nanofibers grafted with APMS in water or acetone		Cellulose grafted with 3-aminopropyl trimethoxysilane (APMS) can leach APMS due to possibility for the reversible bonding between the NH2 group and minority COOH groups on CNF fibers - for some preparations zone of inhibition appears in antibacterial testing. The grafting was much more efficient when using 100 % aqueous solution compared to acetone-based reaction as acetone favors more nanopartic…	https://doi.org/10.1007/s10570-015-0854-1
Quaternized Chitosan on Poly(vinyl fluoride) or stainless steel	coating degradation (XPS [N+]:[C] ratio) after 30 DI water or 70% ethanol wipe cycles (2x2 cm samples)	Coating degradation during cleaning	Stability of coating was dependent on compound used to crosslink quaternized chitosan. Surfaces crosslinked with sodium tripolyphosphate (TPP) where stable whereas [N+]:[C] ratio in case of sodium hexametaphosphate (HMP) or sodium pyrophosphate (PP) was changed after cleaning.	https://dx.doi.org/10.1021/acs.iecr.6b02201
(Triclosan(TCA)/methoxy poly(ethylene glycol)-poly(ε-caprolactone)-chitosan (MPEG-PCL-CS))/poly(acrylic acid) (PAA) multilayer films, TCA 255 μg cm−2	ca. 1 × 2 cm2 samples in 5 mL releasing medium (pH 7.4 PBS buffer, pH 5.5 MES buffer, S. aureus culture in 1 g mL−1 Trypticase soy broth) for 168 h	Bacteria (pH) triggered release of TCA	92% of the total amount of the loaded TCA was released at 8 h from micelles used for coating preparation. Bacterial adhesion caused a local acidic environment and altered the permeability of the multilayer films, promoting drug release. 30% of the total drug was released from the films in pH=7.4 PBSafter 8 h and the sustained release of TCA was prolonged for 168 h. Even at very low concentrations…	https://doi.org/10.1039/C6TB02614A
Chitosan-zinc oxide nanocomposite coatings for the prevention of marine biofouling	25 mm × 75 mm coated and uncoated glass slides, dried, weighed, immersed in 50 ml DI water, 48 h, 30C, constant agitation, dried, weighed	Coating degradation in time	ZnO stabilized chitosan coating. Chitosan coating solubility at 48h was 0.96±0.26% while chitosan/ZnO coating solubility was 0.37±0.01%	https://doi.org/10.1016/j.chemosphere.2016.10.033
Chitosan-Decorated Copper Nanoparticles in polyurethane clear, polyurethane white or acrylic emulsion paint	samples incubated with F/2 algal medium and Amphora culture for 30 days	Cu dissolution in time	There was no change in medium Cu2+ ion concentration during 30 days.	https://dx.doi.org/10.1021/acs.iecr.6b04692
Gentamicin releasing (poly(acrylic acid)/(polyvinylpyrrolidone/chitosan))n ((PAA/(PVP/CHI))n) multilayer films on Silicon wafers or PDMS for implant use, EDC/NHSS and thermal cross-linking	1 × 2 cm2 samples were dipped in 0.1 M PBS, which simulated the conditions of body fluid environment.	Gentamicin release in time (48 h)	Untreated films and cross-linked films by EDC/NHSS completed 53% and 71% of its release of gentamicin within 0.5 h, cross-linked films by thermal treatment displayed more prolonged release of drug (25%). Furthermore, untreated films and cross-linked films by EDC/NHSS completed 100% release within 12 h. Meanwhile the thermal cross-linked films only released 81% of the total dosage of GS at 12 h an…	https://doi.org/10.1016/j.carbpol.2016.12.054
Liquid smoke loaded electrospun chitosan nanofibers (LSCN)on fish fillets	Dialysis bag method, used on LSCN, not LSCN covered fish		Liquid smoke release has initail burst profile with ca 75% LS is released during first 2 days reaching 85–95% after 7 days.	https://doi.org/10.1016/j.lwt.2017.01.062
Copper-loaded acrylated quaternized chitosan/silica on poly(vinyl fluoride) (PVF) films (silica nanoparticles were grown over a layer of acrylated quaternized chitosan (AQCS) covalently immobilized on commercially available transparent PVF films and then loadad with Cu in salt solution); A-Cu (PVF/AQCH/Cu), S1-Cu (PVF/AQCH/SiO2/Cu), Q1-Cu (PVF/AQCH/SiO2/QCH/Cu), S1-S5 different times for SiO2 NP …	1 × 1 cm2 films in 1 mL DI water at 25C for 6-96h; wiping with DI water moistened paper 30, 60 or 100 times	Cu and Si release in time 6-96h; Surface durability to wiping	WIPING: A-Cu subjected to 60 and 100 wipes, the Cu content reduced by ∼67% and ∼89%. For S1–Cu, no significant decrease in the Cu content after 60 wipes but Cu content decreased by ∼68% (from 1.9 μg/cm2 for the as-prepared film to 0.6 μg/cm2) after 100 wipes. Cu content of film S3–Cu decreased by ∼61 and ∼90% after 60 and 100 wipes. No significant decrease in Si content of films S1, S2 after wipi…	https://dx.doi.org/10.1021/acsami.7b07700
Chitosan/gelatin/zinc (CH/G/Zn) coating on titanium	TEM for surface characteization (in PBS) and 15 mm diameter, 1mm thick coated disks in 5 ml PBS; pH 7.4 for 4 weeks	Zn release in time (4 weeks)	Via TEM, release of ZnO nanoparticles was observed. Released Zn amount increased continuously throughout 4 weeks, indicating a sustained-release mode. It was worth noting that only 10 ∼ 20% of total loaded zinc was released at the end of 4 weekss. Surfaces with higher Zn content released more Zn	https://doi.org/10.1016/j.colsurfb.2017.10.012			Slow release Zn
From Ag
Ag–chitosan monolayer coating (prepared from 0.5 g/L chitosan-1 mM AgNO3 solution) and hydroxyapatite-chitosan/Ag-chitosan bilayer coating (prepared from 1 g/L HA, 0.5 g/L chitosan-1 mM AgNO3 solution) on stainless steel (3 × 6 cm2)	20 mL of high purity water	uncontrolled ion release	Ag ions; Ag-chitosan monolayer coating release - final Ag+ concentration in high purity water = 30 ppm after 300 h (plateau reached at 12 h); HA-Ag-chitosan coating final concentration - 1 ppm afer 300 h	https://doi.org/10.1016/j.surfcoat.2008.01.022				2
Bisphenol A glycidylmethacrylate (BisGMA)/triethyleneglycol dimethacrylate (TEGDMA) surface coated with lactose-modified chitosan containing Ag nanoparticles	coated sample rinsed in 1 mL of deionized water for 1 h with constant stirring (no info on temp.)	uncontrolled ion release	Ag ions; concentration below ICP-AES detection limit (<0.01 ppm)	https://doi.org/10.1016/j.actbio.2010.07.024				15
Biomedical NiTi alloy plates (10 mm × 10 mm × 2 mm) coated with Ag or Chitosan/Ag complex (2.1% Ag atomic concentration)	25 mL of deionized water at 37 °C, samples incubated for 5 days	uncontrolled ion release	Ag ions; cumulative release: Ag coating - 0.01 μg/mL after 5 days; Ag/chitosan coating - 1 μg/mL after 24 h, unchanged concentration after 5 days	https://doi.org/10.1016/j.surfcoat.2013.05.037				30
polyvinylidene fluoride membranes coated with dopamine grafted sulfonated heparin-like polymer (DASHP) and dopamine grafted chitosan (DACS) containing Ag nanoparticle-loaded oxidized carbon nanotubes (oCNT). DASHP/AgNPs@oCNT (Ag content 3.72% at), DACS/AgNPs@oCNT (Ag content 3.66% at)	samples were soaked in PBS (pH 7.4) at 37 °C	uncontrolled ion release	Ag ions; cumulative Ag release in wt% of AgNPs: bare AgNPs - 0.5 (6h), 1.1 (12h), 1.6 (24h), 2.9 (48h), 4 (72h). AgNPs@oCNT - 0.6 (6h), 1.2 (12h), 2 (24h), 3.7 (48h), 4.2 (72h). DACS/AgNPs@oCNT - 0.1 (6h), 0.2 (12h), 0.3 (24h), 0.5 (48h), 0.6 (72h). DASHP/AgNPs@oCNT - 0.1 (6h), 0.1 (12h), 0.2 (24h), 0.3 (48h), 0.5 (72h).	https://doi.org/10.1016/j.actbio.2017.01.027				91
highly porous titanium implants coated with chitosan (Ch) and gelatin (Gel) with embedded Ag ions (Ag) and vancomycin (Van). Initial content for Ag and Van not specified	Ag release: samples were immersed in 500 μL of Milli-Q water at 37 ± 0.5 °C. The measurements were performed for time points 6 h, and 1, 3, 7, 14, and 21 days. The medium was refreshed completely after each time point. Vancomycin release: samples were immersed in PBS 37 ± 0.5 °C for 6 h, and 1, 3, 7, 14, and 21 days	uncontrolled ion release	Ag ions, vancomycin; Ag release - Ch/Gel/Ag: 20 ppm (6h), 9 ppm (d1), 5 ppm (d3), 4 ppm (d21). Ch/Gel/Ag/Van: 5 ppm (6h), 4 ppm (d1), 2 ppm (d21). Vancomycin release - Ch/Gel/Van: 140 μg/mL (6h), 90 μg/mL (1d), 15 μg/mL (d3), 4 μg/mL (d7), 2 μg/mL (d14), 1 μg/mL (d21). Ch/Gel/Ag/Van: 20 μg/mL (6h), 15 μg/mL (d1), 9 μg/mL (d3), 3 μg/mL (d7), 0.7 μg/mL (d21). The MIC values of vancomycin and silver…	https://doi.org/10.1021/acsami.7b04950				97
Titanium sheets (2 cm2) coated with poly(acrylic acid) containing chitosan and elemental Ag. Total Ag content - 5 ± 0.5 μg/cm2	coated sheets were incubated in 2 mL ultrapure water (Milli-Q resistivity 18.2 MΩ·cm at 25 °C) at 37 ± 2 °C for 1, 2, 7, 14, and 21 days	uncontrolled ion release	Ag ions; concentration of silver released in water reached a plateau of 0.08 ± 0.02 μg/cm2(corresponding to 83 ± 20 ppb) after 7 days of contact. More than 99% of Ag remained in the coating after 21 days 83 ppb released during 21 days).	https://doi.org/10.1007/s00216-017-0685-z				104
silicone rubber sheets coated with chitosan (CS), Polyvinylpyrrolidone (PVP), or (3-mercaptopropyl) trimethoxysilane (MPTS), and embedded with Ag ions	samples were immersed into PBS solution in a shaking incubator at 37 °C. The solution was collected from the incubation medium every day	uncontrolled ion release	Ag ions; cumulative Ag release: Ag/PVP - 0.60 mg/L (30 days), 0.71 mg/L (45 days). Ag/CS 0.49 mg/L (30 days), 0.56 mg/L (45 days). Ag/MPTS 0.37 mg/L (30 days), 0.45 mg/L (45 days). The Ag+concentration increased steadily with the extension of immersion period into PBS solution, exhibiting sustained-release kinetics without burst release. Plateau not reached.	https://doi.org/10.1007/s10853-017-1939-z				112

## Sheet: Zinc and not Chitosan or Ag
		( ( ( TITLE-ABS-KEY ( "antimicrob* coat*" ) OR TITLE-ABS-KEY ( "antibact* coat*" ) OR TITLE-ABS-KEY ( "antimicrob* surface*" ) OR TITLE-ABS-KEY ( "antibact* surface*" ) OR TITLE-ABS-KEY ( "biocid* surface*" ) OR TITLE-ABS-KEY ( "biocid* coat*" ) OR TITLE-ABS-KEY ( "antibiof* surface*" ) OR TITLE-ABS-KEY ( "antibiof* coat*" ) OR TITLE-ABS-KEY ( "antivir* surface*" ) OR TITLE-ABS-KEY ( "antivir* co…			53 papers (12.04.18)		53 screened
	Material	Release medium and conditions (solution, dry abrasion, cleaning product etc)	Dissolution or shedding of particles; triggered/intentional or unconrolled continuous release/shedding	What was released and in which amount	DOI
marine	Biocide-free antifouling paints and coatings used in unterwater applications (silicones, fibre coatings, epoxy coatings, vinyl coatings, rosing-based coatings)	painted microslides in 100 ml artificial sea water (35 g/L salt) for 48 h	Unintentional release into environment	Measurable amounts of alkylphenols and bisphenol A leached from epoxy, vinyl end eroding coatings. Nonylphenol leached up to 178 ng/cm2/d after 24 h and up to 136 ng/cm2/d after 48 h, and bisphenol A with values of up to 7 ng/cm2/d after 24 h and up to 0.85 ng/cm2/d after 48 h. Silicones leached organotin compounds (mono-, di-, tri-, tetrabutyltin; mono-, dioctyltin, di-, tricyclohexyltin; di-, t…	https://doi.org/10.1016/j.chemosphere.2005.02.066			And some other studies for example https://www.sciencedirect.com/science/article/pii/S0301479708002600?via%3Dihub - about underwater applications - A LOT of Cu, Zn leached intentionally and unintentionally, also some environmental evaluations - maybe someting to compare to. For underwater applications "polishing rate"(μm/month) is used for degradation.
marine	Inorganic peroxides (CaO2, ZnO2, MgO2, SrO2, CuO2) or Cu2O or ZnO with binder (water soluble zinc resinate and zinc oxide; acrylate retarder - methyl methacrylate/n-butyl methacrylate/methacrylic acid terpolymer; plasticizers Lutonal M40 and diisodecyl phthalate) with different release kinetics (fast, intermediate and slow polishing antifouling surfaces)	Painted 6 cm diameter Petri dishes incubated in artificial seawater for 20-21 days, release measured in artificial seawater or DI water	Hydrogen peroxide release in time	Hydrogen peroxide release: The potency of the peroxides generally follows the trend: Zn < Mg < Ca < Sr. Only the intermediate-polishing strontium-peroxide coating had a hydrogen peroxide accumulation that was continuously increasing. Release rate in artificial seawater (μg/cm2 d): intermediate polishing SrO2 (20 ± 3), intermediate polishing CaO2 (1.7 ± 0.2), intermediate polishing MgO2 (0.7 ± 0.1…	https://doi.org/10.1007/s11998-008-9143-3			Zn/Cu is in the marine antifouling paint pigments in huge amounts without calling it biocidal conponent.
general surface	Polymer (active triblock copolymers of polyoxyethylene−polyoxypropylene (i.e., Pluronic P123 and F127)) encapsulated ClO2, added ZnCl2	The release of gaseous ClO2 from coating on glasses was monitored for 7 days at room and body temperatures. The coated glasses were placed in constant temperature ovens at 60−80% RH, and the ClO2 content of the coating was measured at fixed time intervals by titration	ClO2 gas release in time, contact triggered release?	Steady, declinig release of ClO2 during 7 days (35C) or 28 days (ambient temperature), temperature enhances release (8 times higher release at body temperature then at ambient conditions). Approximately 1500 μg of gaseous ClO2 was released per gram of coating material each day at 25C (for 7 days). The addition of 30 ppm ZnCl2 did not affect the release of the encapsulated ClO2, and a comparable C…	https://doi.org/10.1021/la901974d
marine	Ensymatic (hexose oxidase, glucoamylase, starch) hydrogen peroxide releasing marine coatings (rosin, PVME, coloured pigments and filler)	136-day static immersion in artificial seawater	Hydrogen peroxide release in time	Hydrogen peroxide release rate exceeded minimal biofouling threshold 36 nmol cm−2 d−1 for approximately 100 days. HOX enzyme retained 55% activity after 12 week period.	https://doi.org/10.1039/B913772F
medical	Zinc Oxide Nanoparticles Embedded in Poly(N‐isopropylacrylamide) Hydrogel Surface Layers on silanized glass substrates	Sample surfaces in PBS (0.01 M) in a teflon flow cell, 24 h, room temperature.	Zn loss in time (dissolution or particle shedding)	Total loss (UV-vis absorption signal) of Zn from 7 to 15 h depending on coating thickness.	https://doi.org/10.1002/adfm.201102980
marine	Zinc “tannate” (Tata tannine and zinc) loaded marine coating (WW rosin as film forming material, styrene-acrylate copolymer (SAC) as optional co-binder. The plasticizer was chlorinated paraffin or oleic acid. )	8 cm × 8 cm sandblasted and painted acrylic panels in artificial seawater for 28 days, antifouling tests in natural seawater.	Polyphenols and zinc ions release in time	Low zinc release: At the beginning of the assay, coatings 1 and 2b leached an amount of zinc three times lower than paint 2a, this difference decreased to the end of the experiment. The level of zinc leached from the coating ranged between 1 and 2 μg cm−2 day−1 at the end of the assay, probably below antifouling threshold. The total amount of polyphenols leached by coatings formulated with rosin–…	https://doi.org/10.1016/j.porgcoat.2011.11.014
medical	Plasma Polymerized Zinc Acetylacetonate Thin Films on silicon wafers	cover slips, area 1.3 cm2 in 1 ml of ultrapure water during 24 h	Zn release in time	For a given immersion time in DI‐H2O the quantity of zinc released increased with film thickness. Zinc release reaches a maximum after about 6 hours for films of thickness less than 120 nm. For films of thickness 141 nm there appeared to be no further release after 12 hours. A linear relation between the amount of zinc released and the film thickness is observed suggesting that the release is not…	https://doi.org/10.1002/ppap.201200106
paint	Zinc salicylate, zinc benzoate, calcium benzoate or potassium sorbate loaded latex paints in food processing applications	8x8 cm painted acrylik panels in 230 ml distilled water up to 1100 h	Biocide release in time	The amount of zinc cation in the supernatant could not be measured because of its very low concentration, just under the detection limit of the method (0.4 ppm). The total amount of salicylate and benzoate leached was 51 ppm and 46 ppm respectively.	https://doi.org/10.1016/j.colsurfb.2012.11.037
medical	Nano-ZnO-coated cotton bandage	Dissolution:1 × 1 cm2 piece of the ZnO-coated fabric in10 mL of 0.9% NaCl overnight at 25 and 37 °C. Washing: water overnight for several cycles	Zn release in time	Dissolution: Zn2+ in the solution as determined by ICP-OES was 12.72 and 31.69 μM at 25 and 37 °C, respectively. However, because the minimum inhibitory concentration of Zn(II) is 4–8 mM,(54) the leached Zn2+ in our case can not account for the observed antibacterial activity. Washing: Millipore water at pH 7, overnight in the first cycle, the amount of Zn2+ in the washed water was 0.26 μM, which…	https://doi.org/10.1021/am400933n			Reference to Zn dissolution not explaining antimicrobial effect...
marine	zinc salicylate in rosin/oleic acid or rosin/styrene-acrylate copolymer binders (marine antifouling coatings)	8 × 8 cm sandblasted painted acrylic panels in 150 ml artificial seawater	Zn and salicylate release in time	Burst-drop-burst release of salicylate during first 14 days followed by stable low release measured up to 60 days. At the end of the trial, both coatings showed a leaching rate close to 1.0 μg.cm–2.day–1 of salicylate. Zn release: by ca 22 days both surfaces release values approached to 0.4–0.5 μg cm–2 day–1. . According to bibliographic data, Zn2+ ions leaching rate from biocide-free commercial …	https://doi.org/10.1021/ie5015734
marine	chlorhexidine, zinc peroxide and Tween 85 containing biodegradable polymer (poly(ɛ-caprolactone-co-δ-valerolactone) 80/20 ) erodable marine paints	45 days in artificial seawater	Zinc peroxide and chlorhexidine release in time	Chlorhexidine is released faster and in greater amounts than zinc peroxide. The cumulative amount release after 14 days was found to be 178 μg/cm2 and 212 μg/cm2, which correspond to 10% and 27% of release for zinc peroxide and chlorhexidine respectively. After 21 days of immersion, a lower leaching of chlorhexidine is observed, whereas a progressive leaching is obtained for zinc peroxide. Betwee…	https://doi.org/10.1016/j.porgcoat.2013.11.012
medical/general	crystal violet‐coated zinc oxide nanoparticle‐encapsulated silicone polymers	1.1 × 1.1 × 0.1 cm samples in distilled water	Zn release in time, crystal violet photodegradation	Trace amounts of zinc leached into solution (up to 0.0025 mg of zinc per sample) over the 3 weeks experimental duration, plateau after 7 days. The crystal violet‐coated samples demonstrated strong photostability under ambient lighting conditions and even under the intense lighting conditions used in this study ‐ 31 x more intense that that typical of hospital wards and corridors (ca. 200 lx).29 T…	https://doi.org/10.1002/adfm.201402980
windows	VO2/ZnO bilayer film on quartz glass ( antireflective, antioxidative, antibacterial window application)	In 10 ml in PBS, agar-free Luria-Bertani (LB) medium and physiological saline (0.9 wt% NaCl) at 37 °C for 1, 4, 7 and 14 days in static condition	Vanadium and zinc release in time	ZnO layer can effectively reduce the amount of released V ions. Dissolution of Zn was dependent on medium, less in near-neutral PBS and saline (ca (2-5 μg cm–3 after 14 days, reaching a plateau), more in LB (30-45 μg cm–3 after 14 days, not reaching plateau). V release is less dependent on medium (4-7 μg cm–3 after 14 days)	https://doi.org/10.1016/j.apsusc.2015.12.045
marine	Paeonolsilate (PAS) intercalated into Zn2Al Layered Double hydroxides (LDH) - Zn2Al-PAS-LDH composite - and then dispersed in the mixture of acrylic resin and colophony with weight ratio of 2:1 - for marine applications.	Coatings immersed in 1000 ml of NaCl solution (3.5%) stirred with a speed of 200 r/min at 20C	Paeonolsilate release in time, passive controlled release	Steady (no burst) release of paeonolsilate for 28 days (compared to pristine PAS caoting plateauing after ca 14 days). Average release rate 0.54 ppm/d (half of the release rate of pristine coating).	https://doi.org/10.1016/j.matlet.2016.02.151
marine	Copper oxide (CuO) or cetyltrimethyl ammonium bromide (CTAB) capped CuO (CuO-CTAB) or zinc oxide (ZnO) nanoparticles in poly methyl methacrylate (PMMA)	2x2 cm samples immersed in 50 ml of sterile ultrapure water under light and dark conditions for 30 days at 28C.	Metal release in time (ionic+NP)	Under light/dark conditions release follows pattern of 6-7 days low release gradually increasing followed by short burst until day 15-30. Under dark conditions low release period is longer (10 days for Cu from PMMA-CuO ans Zn from PMMA-ZnO, 7 days for Cu from PMMA-CuO-CTAB ) but cumulative release approaches light/dark release by 30 days. The cumulative copper release for a 30 day period was 4.09…	https://doi.org/10.1016/j.ibiod.2016.05.026			late burst
marine	Zn-releasing PVA-based biomimetic polymers (polyvinyl alcohol;3,4-dihydroxybenzaldehyde; butaldehyde abbr. PVA-g-DBA/BA)	90x15x0.3 mm cuopons, coated, immersed in 400 ml artificial seawater, shaked 30 rpm, 35 days at 5, 20, 25C and at pH 7.8-8.5	Zn release in time	PVA-g-DBA + Zn2+ coatings: Burst release of Zn during first 5 days (over 450 μg (cm2 day)−1) after which release gradually declined and stabilized after 20 days at about 100 μg (cm2 day)−1. The release rate of Zn2+ decreases with the increase of pH values. The release rate of Zn2+ increases with the increase of temperature. The release half time of the PVA-g-DBA-based coating with 100 μm thicknes…	https://doi.org/10.1039/C6TB03176E
marine	Zn and Cu containing antifouling commercial marine paints on PMMA panels	Immersion into sea, measurinc Cu and Zn content in surfaces before and after immersion test (150 days at different salinity locations in Sweden).	Cu and Zn release in time.	Cu release was lowest at lowest salinity test site. Cu cumulative release from commercial paints was ca 200-1800 μg/cm2, 3 of the 5 paints tested below 600 μg/cm2. For Zn, no statistical salinity effect was observed. Zn release was measured about 200-1200 μg/cm2. With the exception of Cruiser One, no statistically significant correlation between the leached amount of copper and the leached amount…	https://doi.org/10.1016/j.envpol.2017.03.014
medical	Fast corroding Mg-based coatings on titanium surfaces for implants (Ti6Al4V discs, Ti6Al4V discs coated with pure Mg, and Ti6Al4V discs coated with Mg45Zn5Ca)	11 mm (diameter) × 3.5 mm (height) Ti6Al4V disks, samples taken from cell and bacterial culture media during medium renewal after pre-incubation and two, four and seven days after incubation	Mg release in time	Mg showed burst release profile. The amount of Mg in the coating was 0.825 mg disc−1. The highest measured amount of Mg2+ ions was 24 mmol l−1 d−1 equalling 0.25 mg or ~ 30% of the entire mass of the coatings. Mg2+ ions at a concentration of 8, 7 and 3 mmol l−1 d−1 were detected in the medium on days 2, 4 and 7, respectively. No significant difference in ion release from the surfaces was observed…	https://doi.org/10.1080/08927014.2017.1303832
marine	Butenolide-loaded rosin-based antifouling paint (butenolide concentrations (5%, 10% and 15%), pigment choices (TiO2, Fe2O3, Cu2O and ZnO) and binder compositions (acrylic copolymer to rosin at 1: 2.5, 1.5: 2 and 2.5: 1))	200 mm × 150 mm painted or control PVC panels in 7 L artificial seawater for 30 days, occasional stirring	Butenolide release in time	For the coatings with different butenolide concentrations, the leaching rate and leaching amount demonstrated a concentration-dependent manner (1.3% initial loading for 5% paint, 2.3% initial loading for 10% paint and 2.6% initial loading for 15% paint) with abrupt leaching right after the immersion and, after 5-days monitoring, the leaching kinetics reached the plateau when butenolide began leac…	https://doi.org/10.1016/j.porgcoat.2017.04.014
marine	Sodium paenosilate intercalated into MgAl and ZnAl layered double hydroxide (LDH) on iron plates; (Mg2Al-PAS-LDH, LDH and pristine PAS coatings comparison)	60 × 50 × 0.5 mm coated iron plates in 1000 ml of NaCl solution (3.5%), stirring with a speed of 200 r/min for different periods at different temperatures	Paeonolsilate release in time, passive controlled release	The MgAl-PAS-LDH composites exhibit the self-adaptive controlled release properties with temperature superior to the ZnAl-PAS-LDH composites. Changes in release rate of the Mg2Al-PAS-LDH coating are positively associated with temperature. Release rate is faster in the first 2 h from the initial time of the experiment, thereafter a slower release was observed for the PAS-LDH composites, and equili…	https://doi.org/10.1016/j.apsusc.2017.07.207
medical/general	ZnO nanoparticles and crystal violet in poly(dimethylsiloxane) - bactericidal polymer–nanocomposite on glass substrate, variable ZnO concentrations	10 mL of phosphate-buffered saline (PBS) solution at 37 °C	Crystal violet and ZnO nanoparticle release in time	Crystal violet release reaches a plateau after ca 170h, burst release during ca 24 h. Over a period of more than 300 h, the CV concentration of all of the samples plateaus at below 8.5 × 10–7 M and, overall, no further leaching was observed, indicating stability of the dye in the polymers. Amount of CV leaching was correlated with increasing the nanoparticle weight. No measurable release of ZnO n…	https://doi.org/10.1021/acsomega.7b01473
food/general	Aluminum-doped zinc oxide (AZO) coatings sputtered onto polylactic acid (PLA) for food packaging	In order to assess the particles release from the films, each sample (coated and uncoated films) was immersed in 25 mL of physiological saline solution (NaCl 0.90% w/v) in closed plastic containers kept in dim light. 3 months	Material degradation	Transmittance below 300 nm decreases of about 3% after one month and about 5% after three months, indicating the occurrence of degradation processes of the polymer, or the release of impurities present in the starting material or embedded in the PLA film during the material processing.	https://doi.org/10.1016/j.tsf.2017.10.038
	From Ag and Chitosan
medical	Ti6Al4V discs coated with glass polyalkenoate cement (GPC) containing Ag2O (0.33 mol. percentage) and ZnO (33 mol. percentage)	immersed in up to 65 mL of purified water	uncontrolled ion release	Ion release measured after 1, 7 and 30 days; Ag ions - 0.2 ppm released within 24 h, additional 0.1 ppm released over 30 days (below biocidal concentration of 3.25 ppm); Zn ions - 1.5 ppm released in 24 h, another 1 ppm after 7 days, final 1 ppm released in 30 days (biocidal conc. - >6.53 × 10−4 ppm	https://doi.org/10.1007/s10856-008-3519-x				4
medical/general	Glass substrate (2 × 2.3 cm2) coated with Ag nanoparticles immobilized on ZnO nanorods by arginine (Ag content 59.0 ± 5 μg, 12.83 μg cm−2; Zn content 1016 ± 91 μg)	Coated samples were immersed in deionized water for up to 90 minutes. The same samples were used 11 times alternately, such that each nthand n + 1thstudy denotes a disinfection study and a silver/zinc release study, respectively	uncontrolled ion release	Ag and Zn ions; Ag release after 90 minutes duration for the 2nd, 4th, 6th, 8th, and 10thuse was 103.8 ± 4.6, 94.7 ± 2.5, 65.2 ± 2.8, 44.7 ± 2.5, and 40 ± 1.1 ppb, respectively. Zn release after 90 minutes was progressively reduced from 91.6 ± 2.4 ppb in the 2nd use to 18.5 ± 0.2 ppb after the 8th reuse (as low as ∼26 ppb (11th use, 30 min) of silver release was sufficient to elicit 100% killing …	https://doi.org/10.1039/C4NR06913G				47
water filter membranes	porous Surlyn (Poly(ethylene-co-methacrylic acid) zinc salt) membranes coated with Ag nanoparticles. Coatings with different Ag wt/vol used with measured Ag content: 1) 0.01 - 3.5 μg mm−2, 2) 0.10 - 7.2 μg mm−2, 3) 0.25 - 10.5 μg mm−2, 4) 0.50 - 34.5 μg mm−2, 5) 0.75 - 46.8 μg mm−2, 6) 1 - 135.1 μg mm−2, 7) 5 - 219.5 μg mm−2, 8) 10 - 270.4 μg mm−2	Ag release was studied by dipping the membranes in water for 30 min	uncontrolled ion release	Ag ions; release after 30 min: 1) not detected 2) 0.01 ppm 3) 0.03 ppm 4) 0.05 ppm 5) 0.08 ppm 6) 0.10 ppm 7) 0.18 ppm 8) 0.22 ppm	https://doi.org/10.1039/C6RA18043D				62
marine	Chitosan-zinc oxide nanocomposite coatings for the prevention of marine biofouling	25 mm × 75 mm coated and uncoated glass slides, dried, weighed, immersed in 50 ml DI water, 48 h, 30C, constant agitation, dried, weighed	Coating degradation in time	ZnO stabilized chitosan coating. Chitosan coating solubility at 48h was 0.96±0.26% while chitosan/ZnO coating solubility was 0.37±0.01%	https://doi.org/10.1016/j.chemosphere.2016.10.033
medical	Chitosan/gelatin/zinc (CH/G/Zn) coating on titanium	TEM for surface characteization (in PBS) and 15 mm diameter, 1mm thick coated disks in 5 ml PBS; pH 7.4 for 4 weeks	Zn release in time (4 weeks)	Via TEM, release of ZnO nanoparticles was observed. Released Zn amount increased continuously throughout 4 weeks, indicating a sustained-release mode. It was worth noting that only 10 ∼ 20% of total loaded zinc was released at the end of 4 weeks. Surfaces with higher Zn content released more Zn	https://doi.org/10.1016/j.colsurfb.2017.10.012			Slow release Zn

## Sheet: Copper and not Chitosan, Zn or 
		( ( ( TITLE-ABS-KEY ( "antimicrob* coat*" ) OR TITLE-ABS-KEY ( "antibact* coat*" ) OR TITLE-ABS-KEY ( "antimicrob* surface*" ) OR TITLE-ABS-KEY ( "antibact* surface*" ) OR TITLE-ABS-KEY ( "biocid* surface*" ) OR TITLE-ABS-KEY ( "biocid* coat*" ) OR TITLE-ABS-KEY ( "antibiof* surface*" ) OR TITLE-ABS-KEY ( "antibiof* coat*" ) OR TITLE-ABS-KEY ( "antivir* surface*" ) OR TITLE-ABS-KEY ( "antivir* co…			79 papers (12.04.18)
	Material	Release medium and conditions (solution, dry abrasion, cleaning product etc)	Dissolution or shedding of particles; triggered/intentional or unconrolled continuous release/shedding	What was released and in which amount	DOI
marine	Copper-nickel 90/10	50mm x 50mm x 2mm samples in 2 L sterilized seawater at 20C, medium changed after every 14 days, duration 196 days	Copper loss in time	Initial copper losses from all samples were in excess of 30 μg cm -2 day -1. During the first 12 weeks of incubation these losses gradually decreased to a constant value of approximately 2 μg cm -2 day -1 suggesting that protective corrosion films had then formed. Initial copper losses were greater from samples in aerated media than in the unaerated media but the rate soon diminished and equilibr…	https://doi.org/10.1007/BF00585756
marine	ordinary copper, arsenical copper, copper-nickel 90/10, coppe~nickel 70/30, aluminium brass and aluminium bronze	50mm x 50mm x 1.3mm) sample, deburring and abrading pretreatment, covered with "Lacomit" lacquer, seawater preincubation. Samples were immersed in 6 L sterilized seawater, medium changed after every 14 days. Duration 18 weeks.	Copper release in time	Copper loss after 2 and 18 weeks - ordinary copper (160 μg cm -2 day -1; 72 μg cm -2 day -1); arsenical copper (133 μg cm -2 day -1; 26μg cm -2 day -1); copper-nickel 90/10 (16 μg cm -2 day -1; 4 μg cm -2 day -1); copper-nickel 70/30 (8 μg cm -2 day -1; 1 μg cm -2 day -1); aluminium brass (3 μg cm -2 day -1; 1 μg cm -2 day -1); aluminium bronze, prepared (3 μg cm -2 day -1; 1 μg cm -2 day -1); al…	https://doi.org/10.1007/BF00553258
marine	cuprous oxide and tributyltin (TBT) leaching from self-polishing antifouling paint	Painted samples in filtered seawater, 25 °C; pH 8.2; salinity 35%%; flow rate 1 knot (2.6 m s-1 in flume tank or 0.5–5.1 m s-1 in rotary tank) , up to 17 days	Copper and TBT release in time	Usingthe ﬂume tank method described above, copper and TBT leach rates were calculated as 18.6 +/- 6.5 and1.6 mg cm-2 day-1 respectively, whilst the rotary system produced leach rates of 21.6 and1.7 mg cm-2day-1 respectively. These values are lower than those obtained by the laboratorystandard ASTM method for the same paint (25–40 mg cm-2day -1 for copper and 1.5–4 mg cm-2 day -1 for TBT) and conﬁ…	https://doi.org/10.1002/(SICI)1099-0739(199906)13:6%3C453::AID-AOC864%3E3.0.CO;2-O
marine	Tin-free copper-based antifouling marine paints (commercial cuprous oxide containing paints with or without organic biocide)	Painted steel panels immersed in seawater at San Diego Bay, laboratory measurements (17.6 °C) under dynamic or static conditions or in situ vessel measurements for up to 780 days.	Copper release in time	Copper release rates in static matine setting measured from 25 cm × 30 cm panels exposed in San Diego Bay demonstrated high values (25–65 μg cm−2 day−1) during the first few days of exposure, dropping to 5–20 μg cm−2 day−1 after the first three months of testing with little variation out to 800 days of exposure. All of the coatings tested were releasing Cu at approximately 7–9 μg cm−2 day−1 at da…	https://doi.org/10.1016/S0025-326X(03)00044-4
marine	Commercial cuprous oxide containing antifouling paints (antifouling coatings had cuprous oxide (Cu2O) as the primary biocide within an insoluble matrix of modified epoxy or hard vinyl enhanced with Teflon™. The matrix for the biocide free coating was a two-part epoxy with Teflon™.)	Painted panels in seawater. Closed recirculating "dome" system por passive leaching and two different protocols for abrasive cleaning were evaluated.	Copper release in time	Mean passive leaching rates for copper-based antifouling coatings varied from 3.7 to 4.3 μg/cm2/day. Mean passive leach rates for modified epoxy and hard vinyl coatings one day following cleaning activities were 18 and 15 μg/cm2/day, respectively. These rates decreased three-fold within three days following cleaning activities, dropping to between 4 and 5 μg/cm2/day. Passive leach rates decreased…	https://doi.org/10.1016/j.marpolbul.2003.08.016
general/medical	Polymer-based copper nanocomposites (CuNPs in polyvinylmethylketone (PVMK), polyvinylchloride (PVC), and polyvinylidenefluoride (PVDF) spin coated on glass)	Culture broth, 4 h	Cu release after 4h	Less than 1.1 ppm copper in growth broth after 4h. Copper release increases with the metal loading in the films	https://doi.org/10.1063/1.1794381
marine	Commercial tin-free, self-polishing, hydrolysing AF coating (Cu2O as the main biocide, and 4,5-dichloro-2-n-octyl-3(2H)-isothiazolone (Sea Nine®[Rohm Haas]) as the organic co-biocide)	Two hundred cm2 of the AF coating was applied using airless spray onto steel cylinders (178 mm long and 64 mm in diameter according to ASTM method D 6442-03); immersed static and rotary set-up (2 speeds) in artificial seawater; 63 days	Cu and biocide release in time	The static cylinder had high initial Cu2+ release rates which settled at around 3 μg cm−2 d−1. The Cu2+ release rates for both rotating cylinders showed an initial peak at Day 1 (16 μg cm−2 d−1). This peak was followed by a steady increase in release rates until Day 28 when they stabilised at around 30 μg cm−2 d−1. The organic biocide release rates were not statistically different across all thre…	https://doi.org/10.1080/08927010600924304
marine	Hydrogen peroxide releasing marine coating (30 vol% starch ( plus glucoamylase (50 AU) and hexose oxidase), 36 vol% zinc resinate, 18 vol% methyl methacrylate/n-butyl methacrylate/methacrylic acid terpolymer, 6 vol% poly(vinyl methyl ether), 10 vol% red iron oxide pigment)	Coated 6-well microtiter plates with artificial seawater , 4 to 35 °C, 21 days	hydrogen peroxide release in time	Half-life of hydrogen peroxide release is temperature dependent with values of 22 days at 4 °C, 5.7 days at 10 °C, 3.5 days at 20 °C and 2 days at 35 °C. After 1 day, release rates were 20 μg/(cm2 day) at 4 °C to 37 μg/(cm2 day) at 35 °C. Release rate decreased to below 1 μg/(cm2 day) within the initial 11 days of immersion at 35°C. After 8 weeks, a release rate of 10^−7 μg/(cm2 day) is expected.	https://doi.org/10.1016/j.porgcoat.2010.01.003			Copper in reference paint
medical	Copper‐Containing Titanium Surfaces (Plasma Immersion Ion Implantation of Cu on Titanium)	11 mm in diameter Ti-6Al-4V discs in 700 μl of different media (double-distilled water; AB-human serum; DMEM cell culture medium) at 37 °C and 5% CO2 atmosphere for 24 h. Medium was replaced and incubated another 24 h. A medium volume of 700 ml was selected to simulate a fluid-filled gap between implant and bone tissue.	Cu release in time	Copper release concentration in media after first 24h/ second 24 h is as follows. For Cu-PIII implanted Cu in water 0.02/0.24mM, in serum 1.29/0.55 mM, in DMEM 1.88/0.06 mM. For Dual HiPIMS Ti-Cu-film in water 0.19/0.20 mM, in serum 4.95/1.32 mM, in DMEM 5.47/0.09 mM	https://doi.org/10.1002/adem.201180054
medical	Hydrogenated Cu-incorporated diamond-like carbon (a-C:H/Cu) film on glass substrate	diameter of 1 cm and a thickness of 2 mm sample, 37 °C, 24 h in growth medium	Cu release during 24 h	Ca 90-170 ppb Cu in growth medium after 24 h. The greater the Cu content of the sample the higher the concentration of Cu which diffused into both S. aureus and E. coli suspensions	https://doi.org/10.1080/08927014.2013.769967
medical	Ti6Al4V–Ti/Cu and Ti6Al4V–Ti/Cu–PPEDA (-plasma-polymerized ethylenediamine) implants	5 × 5 mm and a thickness of 1 mm Ti6Al4V coated samples in 700 microlitres of DMEM with 10% FCS and 1 % Gentamicin, incubated at 37 °C and 5 % CO2 atmosphere for up to 240 h.	Cu release in time	Within the first 24 h, the Cu concentration reached 6.47 ± 0.79 mmol/l for the Ti6Al4V–Ti/Cu samples and 6.01 ± 1.34 mmol/l for the Ti6Al4V–Ti/Cu–PPEDA samples. After 48 h, the Cu release amounted to 0.47 ± 0.22 mmol/l for the Ti6Al4V–Ti/Cu samples and 0.37 ± 0.05 mmol/l for the Ti6Al4V–Ti/Cu–PPEDA samples. Only residual amounts were measured after 96 h (Ti6Al4V–Ti/Cu: 0.13 ± 0.18 mmol/l; Ti6Al4V…	https://doi.org/10.1007/s10856-012-4839-4
medical	Plasma immersion ion deposited Cu on titanium	Cu coated titanium samples (Ti–6Al–4V, 11 mm diameter, 1 mm thickness) were incubated in 700 μl solution consisting of Dulbecco's modified eagle’s medium (DMEM), 10% fetal calf serum and 1% gentamicin at 37 °C for 12 h to 7 days	Cu release in time	Ion current strenght and duration influenced release. Higher current and longer treatment granted higher initeial Cu release into DMEM. 120-600 s deposition at 48mM gave a combination with high initial release (needed for antibacterial action) and substantial long-time release without becoming cytotoxic. Maximum initial releasable Cu concentration within the present experimental parameter range w…	https://doi.org/10.1016/j.surfcoat.2014.01.027
medical/general	Cu-containing epoxy resin sprayed or brushed on different substrates, 2.5 and 5 wt% Cu, of copper and copper salts	1-8 h in cell suspension	Cu release in time	The concentrations of Cu ion released from polymer-CuCl2 coatings were higher than those from polymer-Cu coatings. Cu ion-releasing rate on the polymer-Cu salts is also faster than on the polymer-Cu coatings. Concentration in small volume cell suspension from polymer-Cu surfaces after 8h was less than 1.5 ppm, from polymer-CuCl2 after 1h less than 250 and from polymer-CuSO4 after 5h up to about 1…	https://doi.org/10.1007/s00253-014-5670-2
marine	Rosin-based marine antifouling paint (Coatings were prepared using methyl ethyl ketone as the solvent, TiO2 and chalk as pigments, disperbyk-2070 as the dispersing agent, BYK-410 as a rheological additive, mono-component epoxy resin solution Araldite GZ 488N40 BR-1 and WW rosin; added copper dodecanoate)	Painted polyvinyl chloride tubes with a diameter and delimited area of 6 cm and 157 cm2, respectively, immersed in 1l artificial seawater and rotated at 60 rpm for 5-20 days.	Rosin and Cu dissolution in time	Dissolution rate of rosin was about 180 µg.cm–2.day–1 after one day of immersion, reaching a value of approximately 50 μg.cm–2.day–1 in four days. After 20 days, the total copper concentration leached from the developed coating was only 0.053 mg L–1; this was considerably higher at 0.213 mg L–1 for the commercial coating. Antifouling paint developed in this work by combining the epoxy resin with …	http://dx.doi.org/10.1590/S1516-14392014005000032
reverse osmosis membrane	Thin-Film Composite Membranes with Copper NPs ( thin-film composite (TFC) polyamide RO membranes functionalized with CuNPs)	3.8 cm2 coupons in 10 mL of 5 mM NaHCO3 solution (pH 8.25), agitated	Cu release in time	Cu burst release reaching 30% dissolution by day 1 and ca 40% plateau by days 3-6	https://dx.doi.org/10.1021/es404232s
general outdoor	CuNPs and TiO2NPs in epoxy resin sprayed or brushed onto various substrates	JIST0304 standard (Japanese Industrial Standard for Implant application, in testing method for metal release from metallic biomaterials)	Cu release in time	The release rate of Cu ion showed burst release profile gradually reaching plateau after 5 h to the level of <0.4 ppm	https://doi.org/10.1016/j.apsusc.2013.11.067
medical/general	Cu/TiO2 NPs in commercial styrene-acrylic latex paint (SALP)		Cu release in time	0.52% of total copper released in 48h from Cu/TiO2/SALP and <1% from CuCl2/SALP with the same Cu content.	https://doi.org/10.1016/j.cej.2014.07.006
marine	Cu nanowires in elastomeric polydimethylsiloxane (PDMS), Cu 250 µg cm −2	2x2 cm samples in 8 ml seawater during 1, 5, 10, 20 and 50 days	Cu release in time	Fast Cu release during day 1, linear long-time release after 10, 20, 50 days. Stable release of about ≈35 ng cm −2 per day after 10 days. Less than 2 wt% of total Cu on the surface was released during 50 days	https://doi.org/10.1002/admi.201400483
medical	TiCuO films deposited on Ti6Al4V in a closed-field unbalanced magnetron sputtering for prosthetic application	Uncoated and coated Ti6Al4V discs (12.5 mm diameter × 1.23 mm thick), in 2 mL Osteoblast Growth Medium, at 37°C in a humidified atmosphere with 5% CO2. Days 1, 2, 3, and 7 for control discs and Days 1, 2, 3, 4, 7, 14, and 28 days for experimental discs. Medium was changed every 24 hours to simulate physiologic fluid turnover.	Cu release in time	All experimental discs had a peak concentration of copper ions at 24 hours with a subsequent curvilinear decrease over time. Mean (SD) copper ion concentration at 24 hours for discs coated with TiO, TiCuO 20%, 40%, and 80% copper was 1.3 (± 0.9), 11.2 µmol/L (± 2.8), 50.8 µmol/L (± 12.9), and 269.4 µmol/L (± 25.2 µmol/L), respectively. Mean copper ion concentration at Day 28 for discs coated with…	https://doi.org/10.1007/s11999-016-4713-7
medical	Agarose/Cu-Bioglass (agarose mixed with Cu-containing glass powder) for medical application	Gel discs ("pellets") in 8 ml SBF or PBS solution, controlled stirring at 60 rpm at body tem-perature		In the SBF, after 2 hours of im- mersion, agarose/0.1Cu-45S5 and agarose/1Cu-45S5 Cu released respec- tively 0.11 ppm and 0.20 ppm. From 4 hours of immersion, a sig- nificant difference was observed. Indeed, the concentration of copper delivered by agarose/1Cu-45S5 is 5 times greater than that released by agarose/0.1Cu-45S5, respectively, 0.86 ppm and 0.16 ppm. After 4 hours of immersion, agarose…	https://doi.org/10.1007/s11814-017-0132-z
water filtration	Hybrid nanogel (mPEG coated CuO nanoparticles and butynyl phospholane (BYP) polymer) crosslinked onto PVDF/SMA membranes for water filtration systems	1 × 1 cm2 of the membranes was loaded in Luria-Bertani (LB) medium containing E. coli, 37 °C	passively controlled release	Release of copper ions from the permeate was 0.2% to 0.6% after 3 days and 30 days respectively.	https://doi.org/10.1039/C7NR02446K
marine	Polyimide-copper layers consisting of individual capsule-like splats (copper nanoparticles inside the polyimide capsule shells)	2 × 2 cm in artificial seawater	passively controlled release	Compared to the biocide-encapsulated coating, mixture of polyimide and Cu powder without encapsulated structure shows 11 times faster release rate. Almost linear increase up to 700 h. Final copper concentration less than 0.12 mg/L	https://doi.org/10.1016/j.matdes.2017.05.075
medical/general	Mussel-Inspired Funcional Coating of Dendritic Polyglycerol and in Situ-Formed Copper Nanoparticles (on glass)	1.0×1.0×0.1 cm3 samples in 500 μL MilliQ water at 37°C for up to 40 days		First, there was a sharp release of Cu ions on the first (502.9 ppb) and second day (39.1 ppb). Then, the leaching rate of ions became stable (linear) within 38 days, approximately 3–5 ppb per day.	https://doi.org/10.1021/acsami.7b10541
medical/general	Grafted monolayers of the neutral Cu(II) complex of a dioxo-2,3,2 ligand on glass	21x26 mm slides in 3 ml water at pH values of 3.0, 7.0 and 9.0 for 5 h.	Passive Cu release at 5 h	While at pH 9.0 the Cu2+ concentration in water was ∼0, we found almost complete Cu2+ release at both pH 3.0 and pH 7.0 at 5 h	https://doi.org/10.1039/C7NJ04601D
marine	Diuron, tolylfluanid or copper thiocyanate booster biocde containing varnishes (40% (w/w) of polyacrylic binder, 10% (w/w) of the biocide substance and 50% (w/w) of xylene)	Coupons (2 × 2 cm) were immersed in demineralized water (25 mL) during 21 days.	Passive biocide release	Tolylfluanid and copper thiocyanate were released at a very low concentration: the percentage of these biocides quantified in surrounding water after 22 days was lower than 0.5%: the maximal concentrations detected in the surrounding were inferior to 4 μg/mL and 0.4 μg/mL for tolylfluanid and copper thiocyanate respectively. Diuron showed a higher linear release: the rate of release was 20% and t…	https://doi.org/10.1016/j.porgcoat.2017.10.017
medical/general/textile	Polymer brushes-bridged-deposited Copper Nanoparticles on Cotton and Polymeric Materials	Not specified	Cu release in time	Burst release of copper during first 400 min, stable low increase up to 3500 min (seems to be intermittent plateau in release profile). Highest cu concentration 0.15 g/L	https://doi.org/10.1155/2018/6546193
medical/general/textile	Cu-containind Surface-Anchored Metal–Organic Framework (MOF)–Cotton (Layer-by-Layer Growth of Cu3(NH2BTC)2 on carboxymethylated cotton)	0.7 cm × 0.7 cm textile in 1 ml NBM at 37 °C	Controlled (poest synthetic modification) Cu release	At 24 h, the modified material released ∼90% of the total copper content, while the unmodified material released just ∼54% of the total copper content. The modified materials were found to release less copper into the solution within the first 6 h than the unmodified materials. The unmodified MOF–cotton initially releases Cu2+ ions into the solution most quickly over the first 6 h, after which ti…	https://doi.org/10.1021/acsami.7b19455
	From Ag, chitosan, Zn
medical/general	Stainless steel coupons (10 × 20 × 1 mm) coated with electroplated copper-silver alloy containing elemental Ag. The composition of the copper-silver coating was 59 ± 2 wt% of copper and 39 ± 2 wt% of silver	Coated surfaces and uncoated stainless steel controls were incubated in PBS or Brain Heart Infusion (BHI) Broth, sterile or with different initial S.aureus concentrations (in Log CFU/mL), for 30min, 4 and 24h.	uncontrolled ion release	Cu and Ag ions; Ag ion release in μg·l−1: after 30 min - 9 (6.3 ± 0.5 Log CFU/mL), 29 (8.1 ± 0.3 Log CFU/mL), 7 (6.6 ± 0.1 Log CFU/mL), <5 (stain.steel ctrl), undetected (sterile PBS). After 4h - 15 (6.3 ± 0.5 Log CFU/mL), 70 (8.1 ± 0.3 Log CFU/mL), 13 (6.6 ± 0.1 Log CFU/mL), <5 (stain.steel ctrl), undetected (sterile PBS). After 24h - 11 (6.3 ± 0.5 Log CFU/mL), 31 (8.1 ± 0.3 Log CFU/mL), 26 (6.6…	https://doi.org/10.1016/j.surfcoat.2018.04.007				114
general	aluminum sheet (6.0 cm × 7.5 cm) coated with polyester resin powder containing modified natural chabazites and Ag and Cu ions	1) Coated surface were immersed in DI water for 8 weeks in closed container with occasional mild oscillation 2) coated surface was immersed into 0.01 M NaNO3 solution for 7 days to check the leaching of silver ions in presence of counter ions	uncontrolled ion release	Ag ions; 1) no trace of silver found in DI water after 8 weeks (no ions were available for ion exchange). 2) cumulative Ag release -> 0.003 ppm (d1), 0.009 (d2), 0.011 (d5), 0.018 (d7).	https://doi.org/10.1039/C6RA14295H				60
medical	Ag ions and Cu ions incorporated diamond-like carbon coatings on polyethylene (d=10mm). Three coatings with different Ag ion content: 1) 1 × 10^17, 2) 5 × 10^16 and 3) 1 × 10^16 cm−2	samples immersed in 10 ml phosphate buffered saline (PBS) and sealed for 10 days at 37 °C. Every 24 h PBS was harvested and replaced	uncontrolled ion release	Ag ions; release by days in μg cm−2: 1) 1.1 (d1), 0.85 (d2), 0.55 (d3), 0.4 (d4), 0.3 (d5), 0.25 (d6->d10). 2) 0.95 (d1), 0.7 (d2), 0.35 (d3), 0.25 (d4), 0.15 (d5->d10). 3) 0.15 (d1), 0.05 (d2->d10)	https://doi.org/10.1186/s40824-016-0062-6				63
medical/general textile	polyester filament fabric with acrylate coating containing Cu and Ag pigments. Ag applied in four different concentrations (5, 10, 20 and 30%)	textile disks were placed into 200 μl of Luria–Bertani (LB) or Trypticase Soy Yeast Extract (TYSE) culture media in 96 well plates and incubated for 3h at 37°C, rotating at 250 rpm	uncontrolled ion release	Ag ions; release after 3h in LB/TYSE: 5% Ag - ~25 μM, 10% Ag - ~35 μM, 20% Ag - ~45 μM, 30% Ag - ~50 μM	https://doi.org/10.1371/journal.pone.0188304				102
marine	Chitosan-Decorated Copper Nanoparticles in polyurethane clear, polyurethane white or acrylic emulsion paint	samples incubated with F/2 algal medium and Amphora culture for 30 days	Cu dissolution in time	There was no change in medium Cu2+ ion concentration during 30 days.	https://dx.doi.org/10.1021/acs.iecr.6b04692
medical/general	Copper-loaded acrylated quaternized chitosan/silica on poly(vinyl fluoride) (PVF) films (silica nanoparticles were grown over a layer of acrylated quaternized chitosan (AQCS) covalently immobilized on commercially available transparent PVF films and then loadad with Cu in salt solution); A-Cu (PVF/AQCH/Cu), S1-Cu (PVF/AQCH/SiO2/Cu), Q1-Cu (PVF/AQCH/SiO2/QCH/Cu), S1-S5 different times for SiO2 NP …	1 × 1 cm2 films in 1 mL DI water at 25C for 6-96h; wiping with DI water moistened paper 30, 60 or 100 times	Cu and Si release in time 6-96h; Surface durability to wiping	WIPING: A-Cu subjected to 60 and 100 wipes, the Cu content reduced by ∼67% and ∼89%. For S1–Cu, no significant decrease in the Cu content after 60 wipes but Cu content decreased by ∼68% (from 1.9 μg/cm2 for the as-prepared film to 0.6 μg/cm2) after 100 wipes. Cu content of film S3–Cu decreased by ∼61 and ∼90% after 60 and 100 wipes. No significant decrease in Si content of films S1, S2 after wipi…	https://dx.doi.org/10.1021/acsami.7b07700
marine	Copper oxide (CuO) or cetyltrimethyl ammonium bromide (CTAB) capped CuO (CuO-CTAB) or zinc oxide (ZnO) nanoparticles in poly methyl methacrylate (PMMA)	2x2 cm samples immersed in 50 ml of sterile ultrapure water under light and dark conditions for 30 days at 28C.	Metal release in time (ionic+NP)	Under light/dark conditions release follows pattern of 6-7 days low release gradually increasing followed by short burst until day 15-30. Under dark conditions low release period is longer (10 days for Cu from PMMA-CuO ans Zn from PMMA-ZnO, 7 days for Cu from PMMA-CuO-CTAB ) but cumulative release approaches light/dark release by 30 days. The cumulative copper release for a 30 day period was 4.09…	https://doi.org/10.1016/j.ibiod.2016.05.026			late burst
marine	Zn and Cu containing antifouling commercial marine paints on PMMA panels	Immersion into sea, measurinc Cu and Zn content in surfaces before and after immersion test (150 days at different salinity locations in Sweden).	Cu and Zn release in time.	Cu release was lowest at lowest salinity test site. Cu cumulative release from commercial paints was ca 200-1800 μg/cm2, 3 of the 5 paints tested below 600 μg/cm2. For Zn, no statistical salinity effect was observed. Zn release was measured about 200-1200 μg/cm2. With the exception of Cruiser One, no statistically significant correlation between the leached amount of copper and the leached amount…	https://doi.org/10.1016/j.envpol.2017.03.014
marine	Biocide-free antifouling paints and coatings used in unterwater applications (silicones, fibre coatings, epoxy coatings, vinyl coatings, rosing-based coatings)	painted microslides in 100 ml artificial sea water (35 g/L salt) for 48 h	Unintentional release into environment	Measurable amounts of alkylphenols and bisphenol A leached from epoxy, vinyl end eroding coatings. Nonylphenol leached up to 178 ng/cm2/d after 24 h and up to 136 ng/cm2/d after 48 h, and bisphenol A with values of up to 7 ng/cm2/d after 24 h and up to 0.85 ng/cm2/d after 48 h. Silicones leached organotin compounds (mono-, di-, tri-, tetrabutyltin; mono-, dioctyltin, di-, tricyclohexyltin; di-, t…	https://doi.org/10.1016/j.chemosphere.2005.02.066			And some other studies for example https://www.sciencedirect.com/science/article/pii/S0301479708002600?via%3Dihub - about underwater applications - A LOT of Cu, Zn leached intentionally and unintentionally, also some environmental evaluations - maybe someting to compare to. For underwater applications "polishing rate"(μm/month) is used for degradation.

## Sheet: Quat. ammonium and not Chitosan
Search phrase:	( ( ( TITLE-ABS-KEY ( "antimicrob* coat*" ) OR TITLE-ABS-KEY ( "antibact* coat*" ) OR TITLE-ABS-KEY ( "antimicrob* surface*" ) OR TITLE-ABS-KEY ( "antibact* surface*" ) OR TITLE-ABS-KEY ( "biocid* surface*" ) OR TITLE-ABS-KEY ( "biocid* coat*" ) OR TITLE-ABS-KEY ( "antibiof* surface*" ) OR TITLE-ABS-KEY ( "antibiof* coat*" ) OR TITLE-ABS-KEY ( "antivir* surface*" ) OR TITLE-ABS-KEY ( "antivir* co…			56 papers (12.04.18)			no relevant data avalable
Material	Release medium and conditions (solution, dry abrasion, cleaning product etc)	Dissolution or shedding of particles; triggered/intentional or unconrolled continuous release/shedding	What was released and in which amount	DOI			data on QAC release can be read between the lines
Quaternized PEI (Mw= 70,000) attached to surface	No QAC release data	No QAC release data	No QAC release data	https://doi.org/10.1016/j.apsusc.2018.01.109.
Cationic comonomer 2‐methyl acryloyloxyethyl trimethyl ammonium chloride in hydrogel	No QAC release data	No QAC release data	No QAC release data	https://doi.org/10.1002/app.25645
Quaternized catechol reacted with PEI, deposited onto glass substrates, a series of antibacterial coatings with different molar ratio of QCat to primary amine groups of PEI (0.5:1, 1:1, 1.5:1, and 2:1) were prepared	No QAC release data: The coatings always keep its original form even if they were rushed under the faucet for 10 min	No QAC release data: The coatings always keep its original form even if they were rushed under the faucet for 10 min	No QAC release data: The coatings always keep its original form even if they were rushed under the faucet for 10 min	https://doi.org/10.1002/mame.201700430
Dimethyloctadecyl[3-(trimethoxysilyl)propyl]ammonium chloride and dimethyltetradecyl[3-(triethoxysilyl)propyl]ammonium chloride attached to the surface of mesoporous silica nanoparticles (400 nm), commercially available biocide (Parmetol S15, 4,5-dichloro-2-octyl-4-isothiazolin-3-one (DCOIT), a highly hydrophobic compound with good biodegradability and low water solubility) was added inside the n…	No QAC release data: The modified MCM-48 was mixed with coating formulations and painted on PVC panels, and its antifouling performance was assessed in a field test trial in northern Red Sea. All synthesized paints presented significant antifouling properties after 5 months of exposure in real seawater conditions, and the dual antifouling effect of the nanoparticles was confirmed	No QAC release data: The modified MCM-48 was mixed with coating formulations and painted on PVC panels, and its antifouling performance was assessed in a field test trial in northern Red Sea. All synthesized paints presented significant antifouling properties after 5 months of exposure in real seawater conditions, and the dual antifouling effect of the nanoparticles was confirmed	No QAC release data: The modified MCM-48 was mixed with coating formulations and painted on PVC panels, and its antifouling performance was assessed in a field test trial in northern Red Sea. All synthesized paints presented significant antifouling properties after 5 months of exposure in real seawater conditions, and the dual antifouling effect of the nanoparticles was confirmed	DOI: 10.1021/acsami.7b14642
Blending cationic amphiphilic block copolymers (4-(1-(2-(4-methylthiazol-5-yl)ethyl)-1H- 1,2,3-triazol-4-yl) butyl methacrylate units bearing a thiazole and a triazole) with commercial polystyrene, preparing surfaces on glass surfaces by spon coating. Quaternised copolymers wree bound covalently to styrene monomers.	No QAC release data: antimicrobial copolymers used in the blends are not water-soluble	No QAC release data: antimicrobial copolymers used in the blends are not water-soluble	No QAC release data: antimicrobial copolymers used in the blends are not water-soluble	10.1002/mabi.201700258
Quaternized N-halamine polysiloxane was impregnated into polypropylene (PP) in supercritical carbon dioxide, 61 nm thick coating layer was formed	Polypropylene 1x2 inches large pieces were washed with AATCC detergent solution (0.15W% in water) in canister at 49◦C for 45 min. Samples were rinsed, Cl content was measured.	Dissolution; uncontrolled continous release/shedding	With 1 washing cycle, from original 0.35wt% Cl 0.27 wt% was retained, wity 3 cycles 0.23 wt% was retained, with 5 cycles 0.2 wt% was retained, with 10 cycles, 0.15% retained. Cl content was used as proxy to assess the stability of quaternised ammonium compounds. So, after 1 wash 77% of QACs, after 3 washes 65% of QACs, after 5 washes 57% QACs and after 10 washes 42% of QACs retained on polypropyl…	http://dx.doi.org/10.1016/j.apsusc.2017.05.087
Surface-immobilised azobenzene groups and a biocidal β-cyclodextrin derivative conjugated with seven quaternary ammonium salt groups. On irradiation with UV light, the azobenzene groups switch to cis form, resulting in the dissociation of the azobenzene-quaternary ammonium salt complex and release of dead bacteria from the surface.	Release medium: water. UV 365 nm 10 mW/cm2 was used to trigger the release	Triggered/intentional	30 min exposure to UV, the release of azobenzene-quaternary ammonium salt complex was 89.6% . The azobenzene-quaternary ammonium salt complex binding-release cycles triggered by visible and UV light, respectively, could be repeated.	DOI: 10.1021/acsami.7b06483
Benzophenone based quaternary ammonium antimicrobial (BPAM) small molecule was spray coated on carbosil covered S-nitroso-N-acetylpenicillamine surface. S-nitroso-N-acetylpenicillamine surface was releasing nitric oxide (NO) while the quaternary ammonium coompound BPAM affected bacterial viability locally.	No release data for QAC. Release of NO which was due to S-nitroso-N-acetylpenicillamine surface was followed. QAC compound BPAM itself was claimed non-leached.	No release data for QAC. Release of NO which was due to S-nitroso-N-acetylpenicillamine surface was followed. QAC compound BPAM itself was claimed non-leached.	No release data for QAC. Release of NO which was due to S-nitroso-N-acetylpenicillamine surface was followed. QAC compound BPAM itself was claimed non-leached.	http://dx.doi.org/10.1016/j.actbio.2017.05.061
Silica nanoparticles photo-cross-linked with quaternary ammonium compounds which acted as coating on SiO2 nanoparticles. Th enanoparticles were applied on cherrywood and cured usng UV-a (120mW/cm2)	No QAC release data	No QAC release data	No QAC release data	http://dx.doi.org/10.1016/j.porgcoat.2017.02.012
Iodide quaternary ammonium methacryloxy silicate (IQAMS) immobilised to Transbond XT Light Cure Adhesive resin	No release data for QAC specifically. Solubility of the resin with and without QAC was analysed in water after leaching at 37 °C for 7 days. Addition of hydrophobic QAC decreased the solubility of resin.	No release data for QAC specifically. Solubility of the resin with and without QAC was analysed in water after leaching at 37 °C for 7 days. Addition of hydrophobic QAC decreased the solubility of resin.	No release data for QAC specifically. Solubility of the resin with and without QAC was analysed in water after leaching at 37 °C for 7 days. Addition of hydrophobic QAC decreased the solubility of resin.	http://dx.doi.org/10.1016/j.msec.2016.12.084
Recycled concrete aggregate was covered/coated with silica-quaternary ammonium compound (Fixed-Quat) in the form of gel or patricles	No release data on QAC provided. However, release of Fixed Quat from concrete surface was assessed by measuring the antibacterial activity of the wash water. Washings were conducted by submerging the concrete to DI water for 10 min followed by 20 min of undisturbed submersion. First 4 wash waters of both, gel and particle coated concrete killed a bacteria. FixedQuat nanoparticles leached out more…	No release data on QAC provided. However, release of Fixed Quat from concrete surface was assessed by measuring the antibacterial activity of the wash water. Washings were conducted by submerging the concrete to DI water for 10 min followed by 20 min of undisturbed submersion. First 4 wash waters of both, gel and particle coated concrete killed a bacteria. FixedQuat nanoparticles leached out more…	No release data on QAC provided. However, release of Fixed Quat from concrete surface was assessed by measuring the antibacterial activity of the wash water. Washings were conducted by submerging the concrete to DI water for 10 min followed by 20 min of undisturbed submersion. First 4 wash waters of both, gel and particle coated concrete killed a bacteria. FixedQuat nanoparticles leached out more…	10.1007/s13762-016-1168-z
Surface consisting of antifouling bottom layer composed of poly(ethylene glycol) (PEG) brushes and top layer of quaternary ammonium compound (QAC): PEGMA, or DMAEMA that were quaternized	No data on QAC release. Probably QACs on polymer brushes were considered stable structures.	No data on QAC release. Probably QACs on polymer brushes were considered stable structures.	No data on QAC release. Probably QACs on polymer brushes were considered stable structures.	https://doi.org/10.1016/j.colsurfb.2016.08.012
Combination of temperature-responsive N-vinylcaprolactam (VCL), hydrophilic 2-methacryloyloxyethyl phosphorylcholine (MPC) and a bactericidal quaternary ammonium salt (2-(dimethylamino)-ethyl methacrylate (DMAEMA+)) was covalently bound to glass, silicon or PDMS surfaces.	No QAC release data	No QAC release data	No QAC release data	DOI: 10.1039/c6bm00587j
Polymer N,N-dimethyl-N-benzyl-N-(2-methacryloyloxyethyl) ammonium bromide was loaded with chlorhexidine and added as coating to polypropylene surfaces	Release was measured in phosphate buffer saline (PBS) at 37 C over 72 h.	Dissolution of chlorhexidine, althoug the authors claim it was controlled release.	Chlorhexidine was released approx. 20% during 1st hour, ca 30% during 5 h, ca 40% during 24 h, ca 55% during 48 h and 100% during 72 h.	DOI 10.1007/s10029-016-1537-z
β-cyclodextrin (β- CD) derivatives modified with quaternary ammonium salt groups, attached to positively charged surface by electrostatic forces	Release was observed in SDS (sodium dodecyl sulfate) solution which was expected to remove all the unbound β-cyclodextrin (β- CD) attached to quaternary ammonium salt groups	Triggered/intentional release	Using SDS, most of β-cyclodextrin (β- CD) plus quaternary ammonium salt groups were removed (removal efficiency was assessed qualitatively using fluorescent dye as a proxy; also, bacterial removal with β-cyclodextrin (β- CD) plus quaternary ammonium salt groups was evaluated and could be used as a proxy to quantitatively assess the removal of QAC. The results showed that more than 99% of bacteria…	DOI: 10.1021/acsami.6b11187
Combined thermally responsive N-isopropylacrylamide (NIPAAm) and bactericidal quaternary ammonium salts (2-(dimethylamino)-ethyl methacrylate (DMAEMA+)). Attached to surface (PDMS) covalently.	No QAC release described. Described is only effective bacterial and protein release due to thermal swelling/shrinking of thermally responsive polymer	No QAC release described. Described is only effective bacterial and protein release due to thermal swelling/shrinking of thermally responsive polymer	No QAC release described. Described is only effective bacterial and protein release due to thermal swelling/shrinking of thermally responsive polymer	DOI: 10.1021/acsami.6b08893
Surfaces where soft segments composed of polyethylene glycol (PEG) formed antifouling sub-layer and gemini quaternary ammonium salt formed upper layer	No QAC release described. QACs were covalently bound to the surfaces but the amount of QACs on the surface was measured (based on the amount of N+ on the surface of the film). Potential of QACs to accumulate on the surface of the films was observed.	No QAC release described. QACs were covalently bound to the surfaces but the amount of QACs on the surface was measured (based on the amount of N+ on the surface of the film). Potential of QACs to accumulate on the surface of the films was observed.	No QAC release described. QACs were covalently bound to the surfaces but the amount of QACs on the surface was measured (based on the amount of N+ on the surface of the film). Potential of QACs to accumulate on the surface of the films was observed.	DOI: 10.1038/srep32140
3-(trimethoxysilyl)propyldimethyloctadecyl ammonium chloride (DMOAP) was covalently bound to glass surface	No QAC release data	No QAC release data	No QAC release data	DOI: 10.1002/anie.201510813
Novel QAS polymers crosslinked to silanol groups (siloxane linkage) on glass surfaces	No QAC release data	No QAC release data	No QAC release data	10.1039/c5bm00353a
QAC glycidyltrimethylammonium chloride (GTAC) immobilized to plasma polymerized allylamine, covalently bound to surface.	No QAC release data	No QAC release data	No QAC release data	http://dx.doi.org/10.1080/08927014.2015.1115977
Cellulose microfibrils were cationised with QAC: 2,3-epoxypropyl trimethylammonium chloride. Covalent bonding between QAC and cellulose microfibrils. Films were prepared from quaternised cellulose microfibrils.	Release studied in 1/500 diluted nutrient broth, surfaces were shaken for 24 h and subsequently filtered. The growth of bacteria in the filtrate was observed. No direct quantification of QAC was performed.	Uncontrolled shedding was assumed.	During the test time, no antibacterial action was seen i nthe filtrate. THus, it was assumed that no QAC was released.	http://dx.doi.org/10.1016/j.carbpol.2015.09.002
Gemini quaternary ammonium salt was used to modify waterborne polyurethane that was blended into a commercial poly(styrene-acrylate).	NO QAC release data. However, gemini quaternary ammonium salt was shown to be able to migrate to the surface of the polymer. No release of QAC from the surface was observed as no inhibition zones were observed (killing effect was observed only in contact mode)	NO QAC release data. However, gemini quaternary ammonium salt was shown to be able to migrate to the surface of the polymer. No release of QAC from the surface was observed as no inhibition zones were observed (killing effect was observed only in contact mode)	NO QAC release data. However, gemini quaternary ammonium salt was shown to be able to migrate to the surface of the polymer. No release of QAC from the surface was observed as no inhibition zones were observed (killing effect was observed only in contact mode)	DOI: 10.1039/c5ra16714k
Fluorosilicone multi-block copolymers tethering quaternaryammonium salt groups	No QAC release data. Bacterial killing was concluded due to the density of positive charges on the surface.	No QAC release data. Bacterial killing was concluded due to the density of positive charges on the surface.	No QAC release data. Bacterial killing was concluded due to the density of positive charges on the surface.	http://dx.doi.org/10.1016/j.apsusc.2015.04.079
Novel QAC, quaternary ammonium methacrylate compound, with perfluoroalkyl tail on one end and an acrylic moiety on the other.	NO QAC release data. However, the surface was tested with agar diffusion, zone inhibition test and no inhibition zone was observed. Thus, the killing was only due to surface-attached and non-leached QAC-s	NO QAC release data. However, the surface was tested with agar diffusion, zone inhibition test and no inhibition zone was observed. Thus, the killing was only due to surface-attached and non-leached QAC-s	NO QAC release data. However, the surface was tested with agar diffusion, zone inhibition test and no inhibition zone was observed. Thus, the killing was only due to surface-attached and non-leached QAC-s	DOI: 10.1021/acsami.5b04633
Bisunsaturated Gemini comonomer (i.e., α,ω-hexanediyl bis(dimethyl methacrylamidopropyl ammonium bromide) incorporated to antibacterial poly(styrene-co-butyl acrylate) (poly(St-co-BA)) nano-latex	No QAC release data	No QAC release data	No QAC release data	http://dx.doi.org/10.1016/j.msec.2014.12.085
Functional telechelic oligomers derived from the fragmentation of the polyisoprene chains of natural rubber. Not QAC	Not QAC	Not QAC	Not QAC	doi:10.3390/ijms16034392
Quaternary ammonium salts of PDMAEMA attached to PDMS	No QAC release data	No QAC release data	No QAC release data	http://dx.doi.org/10.1016/j.apsusc.2014.12.019
Quaternary ammonium compound bearing a 16-carbon alkyl chain and a terminal methacrylate crosslinked to soy-based matrix	No leaching of QAC from surfaces was measured. QACs assumed not leached as contact killing proven by zone of inhibition test	No leaching of QAC from surfaces was measured. QACs assumed not leached as contact killing proven by zone of inhibition test	No leaching of QAC from surfaces was measured. QACs assumed not leached as contact killing proven by zone of inhibition test	DOI: 10.1039/c5ra03881b
Finish for cotton fabric using quaternary ammonium-modified triethoxysilane. The QAC was covalently attached to cellulose surface through an ether linkage	Release of active ingredient was evaluated using ISO 105-C01:1989(E) standard method using 30 min and a solution of SDC standard detergent (5 g/L). After that the fabric was rinsed with water. Each wash in Atlas Launder-O-Meter corresponds to five home washings.	Release of QACs was not directly measured but it was assumed that no QACs was released - even after 15 cycles the fabrics retained their antimicrobial activity.	Likely no QACs was released.	http://dx.doi.org/10.1080/00405000.2014.952137
QAC dimethyloctadecyl [3-(trimethoxysilyl) propyl] ammonium chloride (C18-TSA) quaternary ammonium salt or its shorter analogue trimethyl [3-(trimethoxysilyl) propyl] ammonium chloride was covalently grafted to polyethylene and polystyrene	No QAC release data	No QAC release data	No QAC release data	http://dx.doi.org/10.1016/j.colsurfb.2014.07.003
Quaternary-ammonium-compounds tethered onto hyperbranched polyurea coatings	No leaching of QACs was quantified but no leaching was assumed due on the basis of zone inhibition test. On agar plate after 96 h at 37 °C ni inhibition xone was noted	No leaching of QACs was quantified but no leaching was assumed due on the basis of zone inhibition test. On agar plate after 96 h at 37 °C ni inhibition xone was noted	No leaching of QACs was quantified but no leaching was assumed due on the basis of zone inhibition test. On agar plate after 96 h at 37 °C ni inhibition xone was noted	DOI: 10.1002/adfm.201301686
Covalent linkage between quaternary ammonium salts, plyvinyl alcohol, cellulose and glass	QAS-PVP, QAS-glass and QAS-cellulose were incubated at 25, 50 and 90 C; per 50 mg material 1 mL of (a) distilled water at pH = 5.8, (b) acetic acid at pH = 3.6, (c) phosphoric acid at pH = 1.5 and (d) Et 3 N at pH = 10.1 was used and the sample was shaken 72 h. Liquid phase from each sample was filtrated via a cotton plug or centrifuged to get a clear solution and diluted 1:100 in LB to neutraliz…	Uncontrolled release of QACs	pHs 1.5-10.1 at 25 or 50 ◦C did not leach any QACs, at 90 ◦C the materials were stable between the pH values of 3.6 and 5.8, while the liquids collected from samples treated at extreme 1.5 and 10.1 pH values showed release of QAS. No quantitative values shown.	http://dx.doi.org/10.1016/j.colsurfb.2013.07.032
Photochemical crosslinking of photosensitive cis-1,4-oligoisoprenes, bearing a variable number of ammonium groups using radical (via acrylate groups) or cationic (via epoxy groups) processes.	No release of QACs was measured, However, algae were grown A. coffeaeformis were grown in leachate of the surfaces and no inhibition fo algal growth was observed. Conclusion: as the polymer chain is covalently corosslinked, detectable release of biocidal products in the marine ecosystem is prevented	No release of QACs was measured, However, algae were grown A. coffeaeformis were grown in leachate of the surfaces and no inhibition fo algal growth was observed. Conclusion: as the polymer chain is covalently corosslinked, detectable release of biocidal products in the marine ecosystem is prevented	No release of QACs was measured, However, algae were grown A. coffeaeformis were grown in leachate of the surfaces and no inhibition fo algal growth was observed. Conclusion: as the polymer chain is covalently corosslinked, detectable release of biocidal products in the marine ecosystem is prevented	http://dx.doi.org/10.1016/j.porgcoat.2013.03.028
Quaternary ammonium polyethylenimine nanoparticles 160-190 nm incorporated in dental restorative resin composites at 2% w/w	No QAC release data. It could be assumed that the material is not leaking from resin as antibacterial afficacy was still present after 1 month storage in water.	No QAC release data. It could be assumed that the material is not leaking from resin as antibacterial afficacy was still present after 1 month storage in water.	No QAC release data. It could be assumed that the material is not leaking from resin as antibacterial afficacy was still present after 1 month storage in water.	DOI: 10.1002/pat.3102
Quaternized poly[(2-dimethyl amino)ethyl methacrylate] grafted on wood	No QAC release data	No QAC release data	No QAC release data	DOI 10.1515/hf-2012-0077
PDMS with poly(sulfobetaine methacrylate) and poly(carboxybetaine methacrylate).	Not QAC	Not QAC	Not QAC	https://doi.org/10.1080/08927014.2013.777046
Quaternary ammonium salts (four different ones were used) attached to PDMS using a crosslinker	No QAC release data	No QAC release data	No QAC release data	dx.doi.org/10.1021/la304571u
Tannin and a quaternary ammonium salt (hexadecyltrimethylammonium bromide ([CH3(CH2)15N(CH3)3]Br) added to soluble matrix paints with two different binders: rosin/oleic acid and rosin/styrene−acrylate copolymer (rosin=brittle solid from pine trees) (some paint formulations contained also Zn)	Leaching of QAS (based on the leaching of polyphenols) was studied in artificial seawater over 1.5 months (40 days)	Dissolution or shedding of QAS, uncontrolled	From 1.5 g QAS/cm2, 3.5 ug/cm2 a day till 1 ug/cm2 a day was released (thus, 0.0001-0.0003% of the material was released in one day) The released amount depended on matrix - rosin/oleic acid matrix to which zinc oxide wsa added inhibited QAS from leaching. No difference was seen between rosin/oleic acid and rosin/styrene-acrylate	dx.doi.org/10.1021/ie301524r
Aliphatic polyesters based on citric acid, alkanediols, and quaternary ammonium salt (degradable antibacterial polymer)	Soaking in distilled water	Decomposition of QAS-polyester polymer (hydrolysis). Uncontrolled release	After 4 weeks 8-25% of QAS containing polymer was hydrolysed, after 16 weeks 10-35% of the polymer was hydolysed. Hydrolysis depended on the length of polymer chain.	DOI: 10.1039/c2ra21286b
Layer by layer click assembled (via alkyne−azide 1,3-dipolar cyclo) azido-functionalized poly(ethylene glycol) methyl ether methacrylate-based polymer chains (azido-poly- (PEGMA)) and alkynyl-functionalized 2-(methacryloyloxy)ethyl trimethyl ammonium chloride-based polymer chains (alkynyl-poly(META))	No QAS release montored. But surfaces were antibacterial after 30 days of immersion in sterile seawater and barnacles did not attach after 1 week storage in natural seawater.	No QAS release montored. But surfaces were antibacterial after 30 days of immersion in sterile seawater and barnacles did not attach after 1 week storage in natural seawater.	No QAS release montored. But surfaces were antibacterial after 30 days of immersion in sterile seawater and barnacles did not attach after 1 week storage in natural seawater.	dx.doi.org/10.1021/bm300757e
QACs (4 types)covalently bonded to the polyurethane network by addition of a polyisocyanate crosslinker - polyurethane coatings	No QAC release data. However, release of QAS was estimated using ZOI test on blood agar. No inhibition zone further than the edge of the coating was observed.	No QAC release data. However, release of QAS was estimated using ZOI test on blood agar. No inhibition zone further than the edge of the coating was observed.	No QAC release data. However, release of QAS was estimated using ZOI test on blood agar. No inhibition zone further than the edge of the coating was observed.	doi:10.1016/j.porgcoat.2011.04.021
Ionic liquids similar to QAS attached to hydroxyl end-capped liquid oligoester via triisocyanate crosslinker	No release data. However, release of QAS was estimated using ZOI test on blood agar. No inhibition zone further than the edge of the coating was observed.	No release data. However, release of QAS was estimated using ZOI test on blood agar. No inhibition zone further than the edge of the coating was observed.	No release data. However, release of QAS was estimated using ZOI test on blood agar. No inhibition zone further than the edge of the coating was observed.	doi:10.1016/j.porgcoat.2011.05.006
N-alkyl-N,N-dimethyldeoxyammonium celluloses to exhibit quaternary ammonium functions	No data on release. Biodegradation potential was studied instead in acetate buffer in the presence of cellulase enzyme. Surfaces with lower degrees of substitution for cellulose wrere degraded and antibacterial compnents were release (zone of inhibition appeared)	No data on release. Biodegradation potential was studied instead in acetate buffer in the presence of cellulase enzyme. Surfaces with lower degrees of substitution for cellulose wrere degraded and antibacterial compnents were release (zone of inhibition appeared)	No data on release. Biodegradation potential was studied instead in acetate buffer in the presence of cellulase enzyme. Surfaces with lower degrees of substitution for cellulose wrere degraded and antibacterial compnents were release (zone of inhibition appeared)	DOI: 10.1002/mabi.201000398
Mix of dodecyl quaternary ammonium, methoxyethyl, and catechol groups (catechol promote immobilization of polymers to films)	No QAC release data. However, after immersion to water and subsequent drying, the orientationof polymers on surface restored showing that polymers were not removed from surface. Also surfaces were immersed to PBS and the leachate was testd on E.coli. No activity towareds E.coli was observed.	No QAC release data. However, after immersion to water and subsequent drying, the orientationof polymers on surface restored showing that polymers were not removed from surface. Also surfaces were immersed to PBS and the leachate was testd on E.coli. No activity towareds E.coli was observed.	No QAC release data. However, after immersion to water and subsequent drying, the orientationof polymers on surface restored showing that polymers were not removed from surface. Also surfaces were immersed to PBS and the leachate was testd on E.coli. No activity towareds E.coli was observed.	dx.doi.org/10.1021/la1046904
Tethered Quaternary ammonium salts in a cross-linked poly(dimethylsiloxane) Matrix	No QAC release data	No QAC release data	No QAC release data	DOI: 10.1021/la1001539
Thiol and disulfide derivatives containing a quaternary ammonium group with variable perfluorinated carbon chains with future aim to be grafted on metal surfaces	No QAC release data	No QAC release data	No QAC release data	doi:10.1016/j.jfluchem.2010.01.007
Quaternary ammonium salt chemically bound to polysiloxane coatings (20 different variants were synthesized)	No QAC release data	No QAC release data	No QAC release data	10.1021/cc900114e
Cationic polycarboxybetaine esters to zwitterionic polycarboxybetaines	No release data	No release data	No release data	doi:10.1016/j.biomaterials.2008.08.030
Tethered quaternary ammonium salts in a crosslinked polydimethylsiloxane matrix	Artificial seawtere was used to collect toxic leachates	Uncontrolled shedding of QAS	Some coatings exhibites high leachate toxiicty suggesting that not all QAC was adequately crosslinked. Found that the stability of coating is dependent on QAS concentration but QAS at higher concentration inhibit biofilm growth.	DOI 10.1007/s11998-008-9098-4
Quaternary ammonium polyethylenimine crosslinked at 1 or 2% w/w to a resin composite	Aging was studied in PBS over 4 weeks (surface was leached over 4 weeks and antibacterial activity was then tested), leaching of material from surfaces was studied on Tryptic Soy Blood Agar with sheep blood (inhibition zones analysis)	Uncontrolled shedding of QA compounds	No quantification of leaching. No leaching was observed as the aged material exhibited antibacterial activity. In ZOI test, no inhibition zone around teh surface was seen	doi:10.1016/j.biomaterials.2008.07.003
Quaternary ammonium (QA) groups deposited on stainless steel and filter paper surfaces via plasma treatment	No release data	No release data	No release data	10.1021/la800405x
Polymer-surface modifier treated surfaces with alkylammonium	ZOI test on agar plates	Dissolution/shedding of particles	Iin ZOI assay no evidence on release of antibacterial components was observed	10.1021/la063718m
poly(4-vinyl-N-methylpyridinium iodide) in poly(styrene)	ZOI test on agar plates	Dissolution/shedding of particles	No ZOI was observed	Beating the bugs
				ONLY ABSTRACT
Quaternary ammonium salt siloxane copolymers	No QAC release data	No QAC release data	No QAC release data	doi:10.1016/j.biomaterials.2005.11.020
Quaternized tertiary amine 2-(dimethylamino)ethyl methacrylate was polymerized directly onto Whatman	ZOI test on agar plates; washing with water	Dissolution/shedding of particles	No ZOI was observed; dring washing some antimrcobials were released (as measured using bacterial growth assay on overlaying water) but the released compiubd was significantly larger than that of the antimicrobial compound	10.1021/bm034352k
No QAC	Not QAC	Not QAC	Not QAC	DOI: 10.1039/c3nr00007a

## Sheet: Ti and not Quat. amm., Chitosan
Search phrase:	( ( ( TITLE-ABS-KEY ( "antimicrob* coat*" ) OR TITLE-ABS-KEY ( "antibact* coat*" ) OR TITLE-ABS-KEY ( "antimicrob* surface*" ) OR TITLE-ABS-KEY ( "antibact* surface*" ) OR TITLE-ABS-KEY ( "biocid* surface*" ) OR TITLE-ABS-KEY ( "biocid* coat*" ) OR TITLE-ABS-KEY ( "antibiof* surface*" ) OR TITLE-ABS-KEY ( "antibiof* coat*" ) OR TITLE-ABS-KEY ( "antivir* surface*" ) OR TITLE-ABS-KEY ( "antivir* co…			70 papers (12.04.18)
Material	Release medium and conditions (solution, dry abrasion, cleaning product etc)	Dissolution or shedding of particles; triggered/intentional or unconrolled continuous release/shedding	What was released and in which amount	DOI
1			chlorhexidine diacetate (AB) released from various coatings The release kinetics varied from slow (over 200 h) to burst release: PDLLA (major 72 h, continued > 200 h) > PTF (major 6 h, continued > 200 h) > PU (burst release, continued for 72 h) > CaP/APC = PVP (burst release, major part released in 1 h)	https://doi.org/10.1002/jbm.a.30611	different coatings (poly(D,L‐lactide) (PDLLA), politerefate (PTF), calcium phosphate/anodic plasma‐chemical treatment (CaP/APC), polyurethane (PU), and polyvinylpyrollidone (PVP) on titanium surfaces with and without chlorhexidine diacetate (CHA)
2			(AB) 3% Rifampicin and 7% fusidic acid 60% released in the first 60 min; after 42 d, 20% had not been released (antiseptics) 2% Octenidin and 8% Irgasan 62% released in the first 60 min after 42 d, 15% had not been released In 42 d, Poly-L-Lactide (PLLA) coating degraded 13%, on avarage in 0.9% NaCl	https://doi.org/10.1002/jor.20193	poly-L-lactide ( PLLA) coated titanium plates with different antibiotics
3			(AB) 94% of minocycline and 95% of rifampin elute by six hours after immersion of the coated device in buffered saline solution.	DOI: 10.2106/JBJS.F.00414	titanium-alloy pin, either coated with minocycline and rifampin (thirteen rabbits) or uncoated (twelve rabbits)
4			poly(ε-caprolactone-co-l-lactide) (P(CL-LLA)) and poly(ε-caprolactone-co-δ-valerolactone) (P(CL-VL)) degradation products: In the case of P(CL–LLA), the amount of LA detected is 23% average after three months of immersion, lactic acid is released more rapidly than hydroxycaproic acid (2%). In the case of P(CL–VL), the degradation is very low: less than 1% of hydroxypentanoic acid and hydroxycapro…	https://doi.org/10.1016/j.eurpolymj.2007.07.045	Copolyesters containing ε-caprolactone and l-lactide or ε-caprolactone and δ-valerolactone at different compositions were synthesized by using tetrabutoxytitane Ti(OBu)4 at high temperature in bulk
5				https://doi.org/10.1016/j.porgcoat.2008.04.010	Not about titania at all! a model based on previous findings is developed and verified and then employed to obtain guidelines for the development of new TBT-free self-polishing coatings
6				10.3183/NPPRJ-2008-23-01-p108-119	Spreading and adhesion of lipophilic extractives on surfaces in paper machines/no access
7				https://doi.org/10.1007/s00776-008-1306-7	One of the inorganic antimicrobials Novaron (grade VZ 600) was applied to titanium alloy (Ti6Al4V) plates/no access
8				https://doi.org/10.1002/pat.1432	Composite nano-TiO2 with doping Fe3+ and Ag, and Fe3+-Ag; no release studies
9			(AB) gentamicin; The films (n = 3) released approximately two thirds of their total load within the first three days in modified simulated body fluid maintained at 37 °C the films continue to release drug in a relatively linear fashion until their expiration at 5.5 weeks The average total loading of these films exceeded 550 μg/cm2. From days 3–13, the films released over 11 μg/cm2/day, and during…	https://doi.org/10.1016/j.biomaterials.2010.04.011	Polyelectrolyte multilayers incorporating gentamicin coated on titanium implants
10				https://doi.org/10.1016/j.surfcoat.2010.07.013	TiO2 films on plasma-treated polymethyl methacrylate (PMMA); no release studies
11				https://doi.org/10.1002/adem.201080030	hexyl‐PVP or copolymers of vinyl‐N‐hexylpyridinium bromide and (4‐vinylbenzyl)phosphonic acid diethylester (poly((hexyl‐VP)‐co‐VBP)) as coating on titanium disks; no release studies
12				https://doi.org/10.1016/j.biomaterials.2010.08.035	Antimicrobial peptides (Tet213 (KRWWKWWRRC)) on calcium phosphate-coated titanium; peptide release studied only via antibacterial properties
13			antimicrobial peptide recombinant human b-defensin-2 (rHubD2) The titanium pins were coated with an excess of rHubD2 (80 μg). After two hours of incubation about 74 to 79 μg of rHubD2 was eluted from the different titanium pins into the medium. Different functionalized titanium pins exhibited a different elution profile in a defined time span.	https://doi.org/10.2106%2FJBJS.I.01738	titanium surfaces were functionalized by four different self-assembled monolayers (SAMs) forming methoxy silanes: (1) hexadecyltrimethoxysilane, (2) dimethoxymethyloctylsilane, (3) allyltrimethylsilane, and (4) 3-aminopropyltrimethoxysilane. In addition, calf skin type-I collagen was cross-linked to the SAM surface 3-aminopropyltrimethoxysilane; functionalized titanium surfaces were coated with r…
14				https://doi.org/10.1016/j.colsurfb.2011.02.041	Nafion/TiO2–GR composite film modified glassy carbon electrode (GCE) for paracetamol electrochemical sensing; no release studies
15				DOI: 10.1021/am2003944	Minireview about self-antimicrobial biomaterials with emphasis on plasma-based surface modification
16				https://doi.org/10.1371/journal.pone.0030321	TiO2 Nanoparticles (not coatings) effect on marine phytoplankton; no release studies
17			synthetic analog of a novel broad‐spectrum antimicrobial peptide Cationic Steroidal Antimicrobial‐13 (CSA‐13) elution rate for the 16% (w/w) CSA‐13 combination coating was 6.11 ± 1.80, 7.16 ± 1.88, and 12.22 ± 3.31 μg/mL for measurements at 4, 8, and 24 h, respectively 18% (w/w) combination coating elution rates recorded at 4, 8, and 24 h were 9.04 ± 2.11, 10.48 ± 1.56, and 14.84 ± 1.21 μg/mL, re…	https://doi.org/10.1002/jbm.a.34209	bare titanium plug, silicone polymer coating on the titanium plug, CSA‐13 doped silicone polymer coatings on titanium plugs
hetero-nanostructured multilayer films comprising negatively charged titania nanosheets (TNS) and positively charged natural antibacterial agent, lysozyme (LSZ), synthesized by the electrostatic layer-by-layer assembly technique on quartz slide substrates	Quartz slide substrates (4.0 cm × 1.0 cm) in 4 mL of PBS for 30 d	No release at all	No leaching of enzyme (lysozyme) or titanium ion was observed in the supernatant when the coating was stored in PBS and the antibacterial activity is retained for at least 30 days.	https://doi.org/10.1016/j.surfcoat.2012.08.066
19				https://doi.org/10.1007/s10529-012-1040-2	Nanostructured crystalline titanium dioxide coatings on titanium grade five medical implant substrates; no release studies
20			The initial burst release showed that 9.4% of the accumulated amount of (Z-)-4-bromo-5-(bromomethylene)-2(5H)-furanone (BBF) was slowly released from the antibacterial coating at the first sampling time of 4 hours. At the second stage of release, 80.8% of BBF was slowly released from the antibacterial coating during the next 60 days. Compared with the release curves for BBF from BBF-loaded PLLA n…	https://doi.org/10.2147/IJN.S37022	(Z-)-4-bromo-5-(bromomethylene)-2(5H)-furanone (BBF)-loaded poly(L-lactic acid) (PLLA) nanoparticles on microarc-oxidized titanium
21				No DOI	Hybrid polymer composite coatings based on photopolymerizable piperazine derivatives microfilled with TiO2; no release studies
22				https://doi.org/10.1016/j.colsurfb.2012.09.036	biocides-free siloxane antifouling coatings, containing low toxic additives, such as TiO2 nanoparticles, surfactants and antioxidants, intended to prevent biofilm formation (i.e. fouling-release); no material release studies
23			(AB) with a copolymer HA-g-PLA concentration of 6% (w/v) and for 1% (w/v) of vancomycin, the release can be prolonged up to 72 h, the amount of drug released in the intervals between next samplings is always more higher than the minimum inhibitory concentration (MIC) of vancomycin which is 1.56–3.12 mg/l. By increasing the amount of loaded vancomycin (from 1%, w/v to 2%, w/v), the rate of release…	https://doi.org/10.1016/j.ijpharm.2013.03.059	hydrogels based on hyaluronic acid (HA) grafted to polylactic acid (PLA) loaded with vancomycin and/or tobramycin on titanium disks
24				DOI: 10.1039/C3SM50584G	surface attachment of the model bacterium Escherichia coli was evaluated on a variety of medically relevant materials including glass, titanium, and silicone; no release studies
25				DOI: 10.1021/la4014575	short amphiphilic four-armed PEG-dopamine polymer polymers on titanium oxide surfaces; no release studies
26				https://doi.org/10.1016/j.colsurfb.2013.07.061	nti-adhesive coating on titanium surfaces by ulvans (algal polysaccharide) immobilization; no release studies
27				https://doi.org/10.1016/j.colsurfb.2014.02.022	TiO2 and stainless steel coated with our PEG-triscatecholate (non-peptidic trimeric catecholates ); no release studies for surfaces
28			antimicrobial peptide After 11 days of incubation in saliva, the covalently anchored coatings, cov-GL13K (derived from the human salivary protein Parotid Secretory Protein (BPIFA2)) showed a 2% peptide release from the surface. Peptides from control surfaces rose to around 9% release to saliva	https://doi.org/10.1371/journal.pone.0111579	peptide coatings on Ti surfaces
29				10.1039/C4FD00113C	UV-activated antimicrobial polymers by incorporating nano-TiO2 and nano-Au/TiO2 into medical grade silicone; no release studies
30			(AB) Chlorhexidine-poly(4-benzoyl-p-xylylene-co-p-xylylene)-modified Ti6Al4V substrates in 2 mL PBS at 37 °C for 30 days. No trace of detectable Chlorhexidine was found in the PBS, confirming the stable binding of CHX molecules	10.1039/C4TB00992D
31				10.1021/acsami.5b01210	Ti-surface grafted with poly(N-hydroxyethylacrylamide) (PHEAA) brush and further decorated with triclosan (TCS); no release studies
32				https://doi.org/10.1016/j.surfcoat.2014.12.021	visible-light responsive nitrogen-doped titanium dioxide (TiO2) layer that strongly adheres to Ti materials; no release studies
33				https://doi.org/10.14233/ajchem.2015.17187	silicon-modified acrylic resin modified with nano-TiO2; no relase studies
34				https://doi.org/10.1080/02772248.2015.1052204	Review
35				https://doi.org/10.1016/j.actbio.2015.05.037	polymer brush coating of poly(l-lysine)-graft-poly(ethylene glycol) (PLL-g-PEG) on titanium; no release studies
36			Gelatin cross-linked BBF-poly(L-lactic acid)(PLLA)-NPs on microarc oxidation (MAO)-treated commercially pure Ti specimens. The in vitro release profile of (Z-)-4-bromo-5-(bromomethylene)-2(5H)-furanone (BBF) from the antibacterial coating exhibited a biphasic release phenomenon. There was a burst release of small amounts of BBF (9.4%) into PBS in the first 4 hours. This rapid liberation was follo…	https://doi.org/10.2147/IJN.S75706
37				https://doi.org/10.3390/ijms16024327	copolymer coating of 4-vinyl-N-hexylpyridinium bromide and dimethyl(2-methacryloyloxyethyl) phosphonate (VP:DMMEP 30:70) on titanium; no release studies
38			Purified fraction from a tannin-rich extract of Terminalia chebula named as Fraction 7 on a titanium alloy surface ( 1 cm × 1.5 cm × 1.6 mm). Release in 6 ml of phosphate buffer solution (pH 7.4). After 2, 5, 20, 72, 96, 120, and 144 h at 37 °C on shaker. Typical initial burst release of the Fraction 7 followed by a steady and extended release. The coated films released only about 10–15 % of the …	https://doi.org/10.1007/s12010-015-1525-2
39				https://doi.org/10.1007/s11837-015-1350-7	Chimeric antimicrobial peptides on titanium alloy implants; no release studies
40			(AB) chlorhexidine (CHX) hexametaphosphate (HMP) NP-coated titanium specimens (10 × 10 × 1 mm). Immersed in 3 mL deionised water. Soluble CHX was released from CHX–HMP NP-coated titanium continually throughout the experimental period. Approximately 4× more CHX was released from specimens that were not coated with a salivary pellicle compared to pellicle-coated specimens.	https://doi.org/10.1007/s10856-015-5532-1
41				https://doi.org/10.1116/1.4913376	Polyethylene glycol-like coatings on titanium ; no release studies
42				10.3969/j.issn.2095-4344.2015.25.026	In Chinese
43				10.1039/C5TB00611B	Communication; no release studies
Nanopillared TiO2 surface with an ultrathin tannic acid/gentamicin (TA/G) LbL film	TiO2 foils 4 cm × 1 cm x 0.5 mm; immersed in 0.5 mL pH 5.0 and pH 7.5 PBS, respectively, and incubated on a rotating table at 60 rpm up to 2 h at room temperature	Controlled release of antibiotics	(AB) The coating is noneluting at pH 7.5, but starts releasing increased amounts of gentamicin when pH is lowered between 7.5 and 5.0. This new LbL coating preserves its antibacterial activity even after 35 days. On the basis of a calibration curve that relates the area of an inhibition zone with the amount of gentamicin, release from 3D-nanopillared samples at pH 5.0 corresponds to 3.5 μg/cm2	10.1021/acsami.5b05947
45				https://doi.org/10.1016/j.biomaterials.2015.07.030	UV-photofunctionalized titanium implant; no release studies
46			antimicrobial peptide Tet213 linked to collagen IV through sulfo-SMPB, renamed as AMPCol; multilayer AMPCol coatings on smooth titanium surfaces (LBL technique) AMPCol release increased as assembly layers increased and was released at a steady rate over time, through 28 days of measurement	https://doi.org/10.1038/srep16336
47				10.1039/C5RA19298F	photocatalytic Fe3O4@TiO2 core–shell nanoparticle/epoxy composites; no release studies
48				10.1021/acsami.5b10074	PDMA-co-APMA were grafted onto the initiator-modified NPs by SI-ATRP. Peptides E6 (sequence RRWRIVVIRVRRC) and Tet20 (sequence KRWRIRVRVIRKC) were conjugated to the polymer brushes using iodoacetic acid N-hydroxysuccinimide ester as a linker; on titanium surfaces; no release studies
49				10.1039/C5PY01234A	Catechol-containing poly(ethylene glycol) (CaPEG) was synthesized by epoxide–amine polymerization of poly(ethylene glycol) diglycidyl ether (PEGDGE) and dopamine; CaPEG can be converted into sulfobetaine groups in a simple post-polymerization step, leading to the formation of catechol and zwitterion-bifunctionalized PEG (SBCaPEG); On titanium surfaces; no release studies
50				10.1021/acsami.5b03697	Ti-surfaces coated with chimeric bifunctional antimicrobial peptide (TiBP1-GGG-AMP, and TiBP2-GGG-AMP); no release studies
51				https://doi.org/10.1002/chem.201505173	Communication; Graphitic C3N4‐Sensitized TiO2 Nanotube Layers; no release studies
52				https://doi.org/10.2147/IJN.S100763	halogenated furanone compound-loaded poly(L-lactic acid) nanoparticles on microarc-oxidized titanium implants; in vivo study; no release studies
53				https://doi.org/10.1002/jor.23238	antibacterial agent SPI031, a N‐alkylated 3, 6‐dihalogenocarbazol 1‐(sec‐butylamino)‐3‐(3,6‐dichloro‐9H‐carbazol‐9‐yl)propan‐2‐ol, was covalently linked to Ti substrates (SPI031‐Ti); indirect release study: no difference was found between the number of bacteria in the tissue surrounding the control‐Ti and SPI031‐Ti discs, indicating that SPI031 was not released from the implant
54				10.1039/C6TB03337G	Ti substrate treated with Tet213 or Anchor-AMP (antimicrobial peptides); no release studies
55				10.11622/smedj.2016021	titanium surgical screws coated with the polyvinylpyrrolidone-polyurethane interpolymer; in vivo study with rabbits; no release studies
56			(AB) vancomycin-coated (Eudragit RS and Eudragit RL, as sustained release control agents, copolymers derived from esters of acrylic and methacrylic acid + triethyl citrate as a liquid plasticizer + talc) titanium alloy; the antibiotics coating materials and polymer coating materials were coated onto the surface of the titanium alloy discs by a plurality of sets of spray. It sprayed a mixture of a…	https://doi.org/10.5582/bst.2017.01061
57				https://doi.org/10.2147/IJN.S116105	titanium with a nanophase TiO2 surface treatment; no release studies
58				10.1021/acsami.6b15859	cysteinylated battacin lipopeptide, covalently immobilized on titanium Surfaces were immersed in MHB medium for 24 h (soft cleaning), and then transferred to 1 mL of fresh MHB containing 10^6 CFU per mL of P. aeruginosa and E. coli which were then allowed to grow overnight. The surfaces were then rinsed and sonicated and a CFU determination of the detached bacteria carried out. Results from this …
59				https://doi.org/10.1016/j.jhazmat.2017.07.005	TiO2 nanoparticles consisting of 20% anatase with a primary particle size of about 5 nm were used to functionalize glass microfiber filters and glass slides; no release studies
60				10.22203/eCM.v033a11	(AB) chlorhexidine-releasing epoxy-based coating on titanium implants; release was studied only from aluminium sheets: > 80 % of the release, 19 and 41 µg/cm2 chlorhexidine, respectively, occurring in the first 24 h. After 4 d, 23 and 47 µg/cm2 chlorhexidine were released from the CHX5 - and CHX10-coated sheets, respectively
61				https://doi.org/10.1002/adma.201602869	Communication; NiTi/Hydrogels Nanocomposites, no release studies
62			(AB) silica-gentamycin (SG) nanoparticles incorporated within a gelatin matrix and cross-linked on microarc-oxidized titanium NB! release was studied in suspension!!! faster release of gentamycin in the first 12 hours in which ~29.40% of the drug was released. Overall, 88.22% of the accumulated drug release was achieved after 14 days. Decomposition of SG nanoparticles - A hollow feature appeared …	https://doi.org/10.2147/IJN.S123622
63				10.1021/acssuschemeng.6b02737	Tannic acid-functionalized Agr (AgrTA) deposited onto titanium. Stability studied on stainless steel (SS) surfaces There is no significant difference (p > 0.05) in inhibition of bacterial adhesion between the AgrTA-coated SS surfaces before and after aging in PBS for 30 days. Thus, the AgrTA coatings on the SS surfaces are stable. no release studies
64			fast corroding Mg-based coatings on titanium surfaces (11 mm (diameter) × 3.5 mm (height), amount of Mg in the coating was 0.825 mg disc−1) Magnesium ions in modified Eagle’s osteogenic cell culture medium Mg2+ ions at a concentration of 8, 7 and 3 mmol l−1 d−1 were detected in the medium on days 2, 4 and 7, respectively. In the pre-incubation phase, ~ 24 mmol l−1 d−1 (0.25 mg or ~ 30% of the ent…	https://doi.org/10.1080/08927014.2017.1303832
65			anthelmintic drug niclosamide-coated titanium substrates, theoretical surface concentrations ranging from 3.1 × 10−3 to 3.1 × 10−2 μg mm−2 the results from attachment inhibition studies indicate that the hydrophobic niclosamide is not completely released into solution from the surface of the coated substrates	https://doi.org/10.1088/1748-605X/aa7105
Nanoporous Gallium Titanate Layers for Titanium Implants Ti samples were soaked in 5 mL of 5 M NaOH, rinsed with ultrapure water, and subsequently soaked in 10 mL of a mixed solution of 100 mM CaCl2 and X mM GaCl3	surface dimensions 10 × 10 × 1 mm3 in 2 mL of phosphate-buffered saline (PBS) the pH adjusted to 7.4 at 36.5 °C. They were gently shaken at a speed of 50 strokes/min for predetermined periods of up to 7 days.	Intentional release	Ga and Ca ions released from the Ti subjected to 100Ca + 0.05Ga or 100Ga treatment metal sample subjected to 100Ga rapidly released 1.58 ppm of Ga ions within 1 h, and slowly released another 1.22 ppm up to 7 days in (a) proportion to the square root of the soaking time. Further release was not observed until 14 days. In total, 2.96 ppm of Ga ions was released. The Ga release increased up to 3.75…	https://doi.org/10.3390/nano7080229
67			lysozyme (embedded into a matrix of polyethylene glycol (PEG) and polycaprolactone (PCL)) coatings of Ti implants antibacterial activity of polymeric materials indicated that all tested samples have inhibited the growth of bacterial strains, demonstrating the release of the active substances from the coated Ti samples.	https://doi.org/10.1016/j.apsusc.2016.11.129
68			(AB) titanium (Ti) disks superficially modified with tetracycline (TCH)‐incorporated polymer (Poly(dl‐lactide) (PLA) + poly(ε‐caprolactone) (PCL) + Type‐B Gelatin (GEL) from bovine skin) nanofibers For the drug release analysis TCH‐incorporated mats (15 × 15 mm2) were incubated in 10 mL of PBS at 37°C. TCH was mostly released within the first 24 h, with the more concentrated groups releasing a gr…	https://doi.org/10.1002/jbm.b.33743
69				https://doi.org/10.1016/j.surfcoat.2017.07.072	photoreactive TiO2/HAp/polyacrylate hybrid thin films; polymer weight-loss (15%) was reported as a result of photooxidation; no release studies
70				10.1115/1.4038093	Superhydrophobic Titanium Alloy / no access
71				https://doi.org/10.1016/j.nanoen.2018.01.033	photocatalytic TiO2/barium titanate (BTO)/Au multilayered coaxial heterostructured nanorod array ; no release studies
72				https://doi.org/10.3390/ma11060889	UV-responsive photocatalyst, titanium dioxide (TiO2), on an orthodontic resin; no release studies
73				https://doi.org/10.1016/j.colsurfb.2018.03.019	superhydrophobic titania nanotube arrays; no release studies
74				https://doi.org/10.1016/j.colsurfa.2018.04.012	non-biocide-release based polyurea-crosslinked cationic acrylate copolymer using 3-(methacryloylamino) propyl trimethyl- ammonium chloride (MPAC) as antibacterial functional monomer with nano-TiO2 as additive; no release studies
75				https://doi.org/10.1016/j.apmt.2018.04.003	antimicrobial peptides Mel4 and caspofungin were covalenty immobilized on titanium surfaces, the water wash alone may not remove all physisorbed caspofungin; hence small amounts may still remain on the surface and leach into the solution; no release studies
76				https://doi.org/10.1016/j.colsurfb.2018.04.050	A cell adhesive (peptide RGD), bacteriostatic (Polyethylene glycol) and bactericidal (AMP LF1-11) coating for titanium implants; no release studies
Bioactive coatings were formed on alloy Ti6Al4V by plasma electrolytic oxidation (PEO) in two different electrolytes; a conventional Ca/P-based electrolyte and its modified version with added F and Si	Immersion tests were performed at (37 ± 0.5) °C using specimens with a total exposed area of 4 cm2 placed in tightly sealed containers with 25 mL of 0.9% NaCl solution.	uncontrolled release (minor)	The measured F− content in the liquid decayed with immersion time from 32.7 μg cm−2 to 18.6 μg cm−2 and from 13.2 μg cm−2 to 7.4 μg cm−2 in PEO-Si/F-600s and PEO-Si/F-180s treatments, respectively Large amounts of liberated Ca2+ and PO43− ions, as detected by ICP in solutions acidified in order to dissolve the colloid precipitates indicate that fluorapatite precipitation and consequent depletion …	https://doi.org/10.1016/j.apsusc.2018.04.267
78				https://doi.org/10.1016/j.apsusc.2018.06.016	(AB) biocompatible composite coatings based on polyaniline (PANI) embedded with magnetite (PANI-Fe3O4) and Lincomycin hydrochloride (PANI-Lincomycin) or Lincomycin-functionalized magnetite (PANI-Fe3O4@Lincomycin) on titanium disks; hypothetical mechanism triggered by release of antibiotic; in reality, no release studies
